# Supplementary material for: Prognostic Value and Genome Signature of m6A/m5C Regulated Genes in Early-Stage Lung Adenocarcinoma
Source: MDPI journal article supplement (doi:10.3390/ijms24076520), 2023-03-30
Supplement: s1 [file s1]

## Supplementary Figures

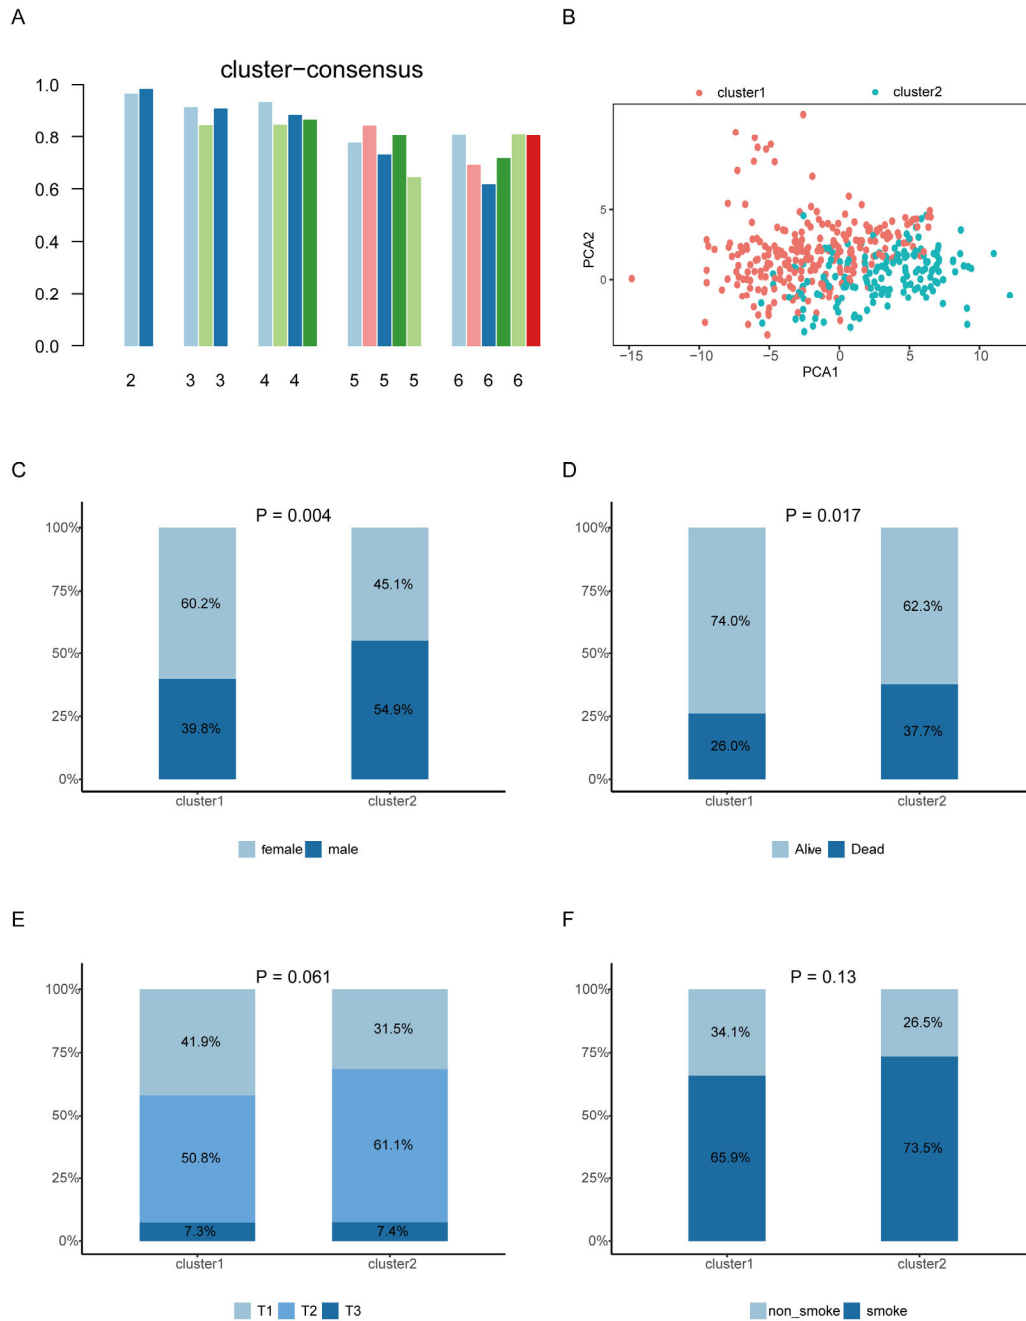

**Figure S1** Detail result of clustering, PCA and clinical features between molecular clusters. (A) The Cluster-Consensus Plot represented the chosen optimal cluster number ( $k=2$ ) for m6A/m5C genes. (B) PCA analysis of m6A/m5C clusters in TCGA cohort. (C-F) Comparison of the distribution of different clinical features between the two m6A/m5C clusters in TCGA dataset.

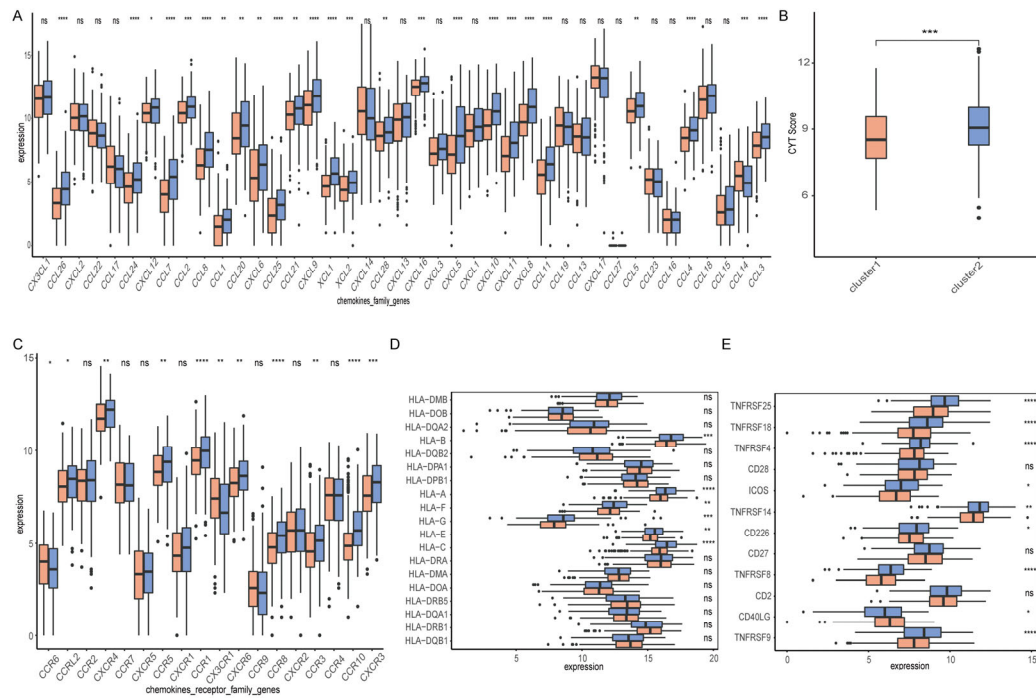

**Figure S2** Expression of chemokine and MHC in different m6A/m5C subtypes.(A) The expression of chemokine genes in m6A/m5C subtypes. (B) The score of Cytolytic activity in m6A/m5C subtypes. (C) The expression of chemokine receptors genes in m6A/m5C subtypes. (D) Gene expression of HLA gene sets between the m6A/m5C clusters. (E) Gene expression of MHC gene sets between the m6A/m5C clusters. Statistical significance at the level of ns  $\geq$  0.05, \*  $<$  0.05, \*\*  $<$  0.01, \*\*\*  $<$  0.001 and \*\*\*\*  $<$  0.0001.

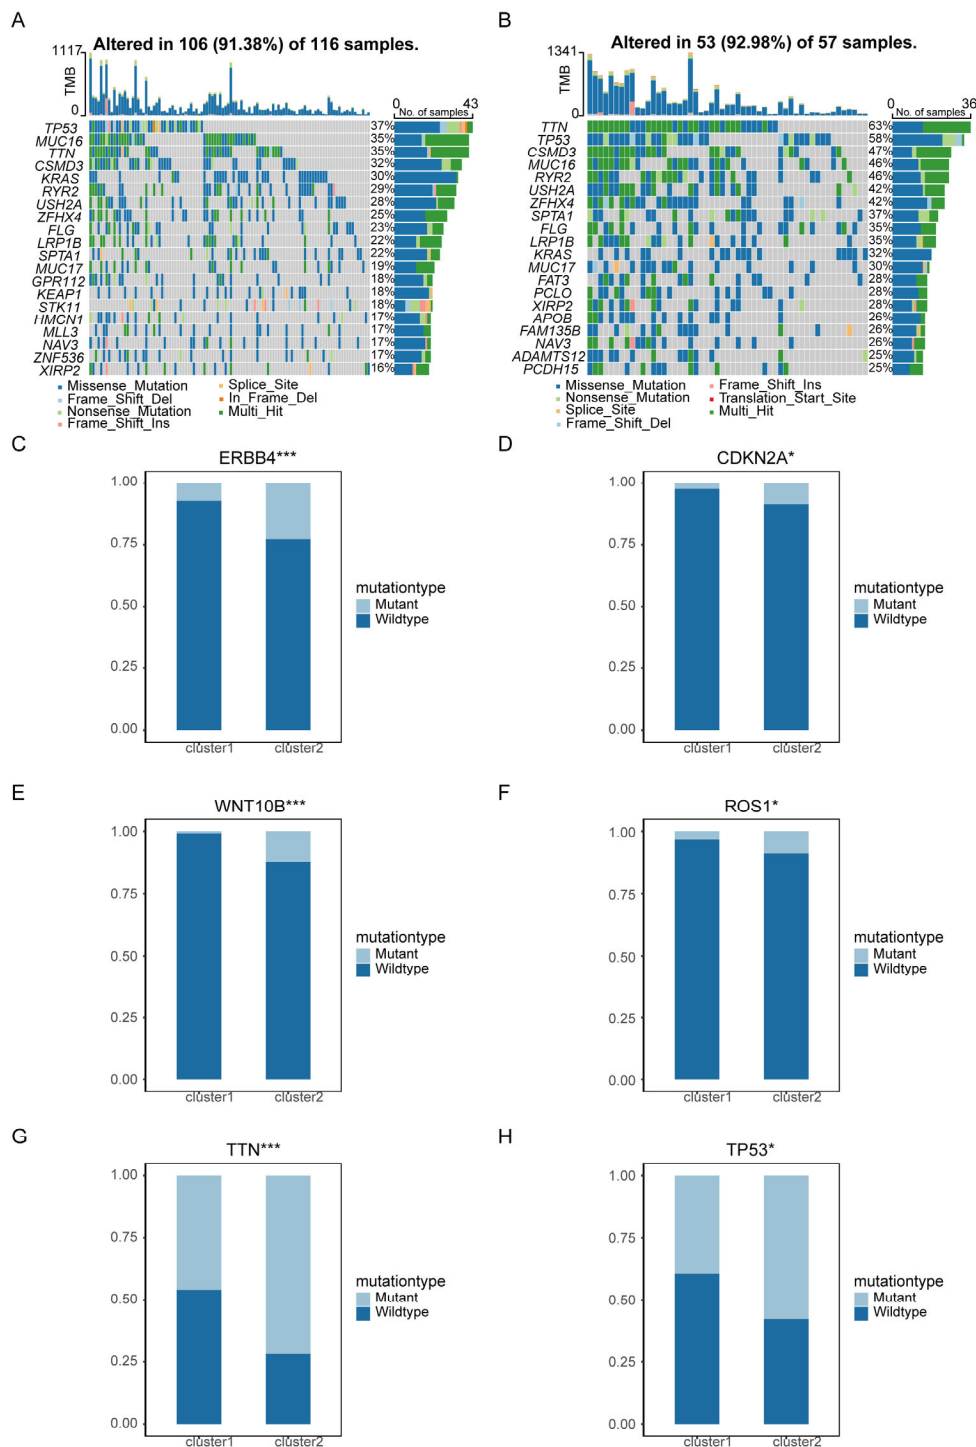

**Figure S3** Detailed results of mutation analysis between cluster1 and cluster2. The waterfall plots showing the top 20 mutated gene of cluster1(A)and cluster2(B). (C-H) Barplots showing the mutation frequency of 6 differently mutating genes in clusters.

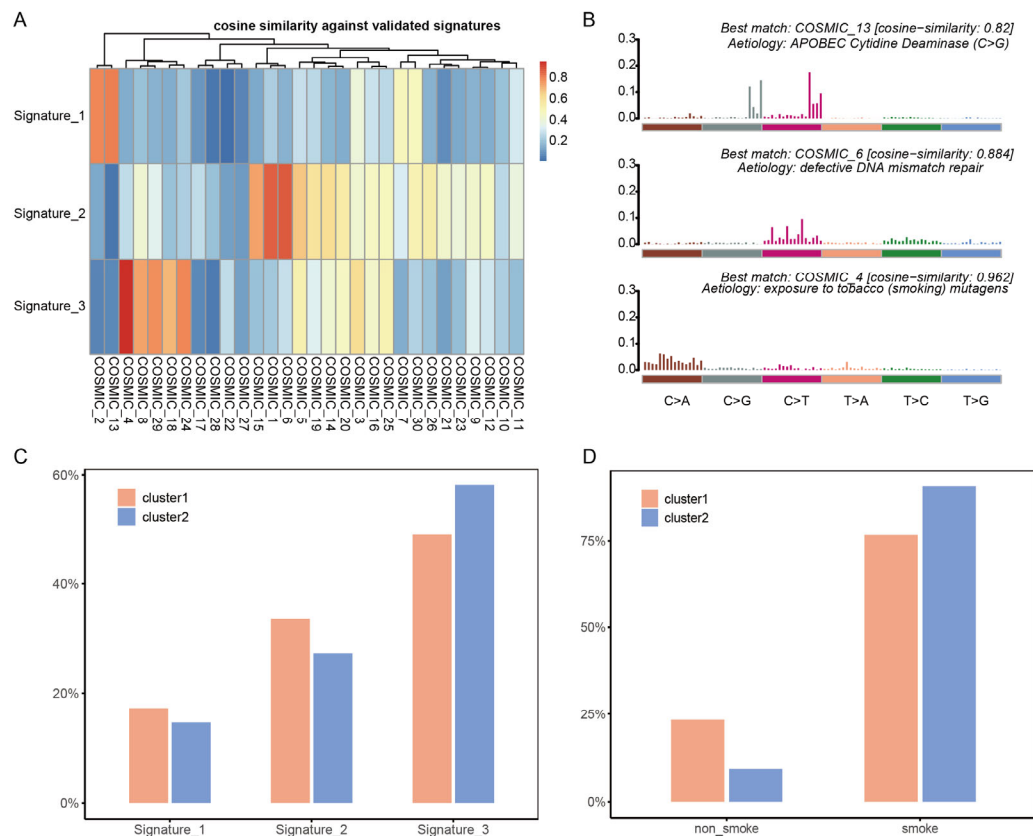

**Figure S4** Mutation signature analysis of the early-stage TCGA-LUAD.(A-B) Mutational signatures associated with the early-stage TCGA-LUAD. (C) Comparison of the distribution of m6A/m5C subtypes among the three mutational signatures. (D) Comparison of the distribution of m6A/m5C subtypes between different smoking status in signature 3.

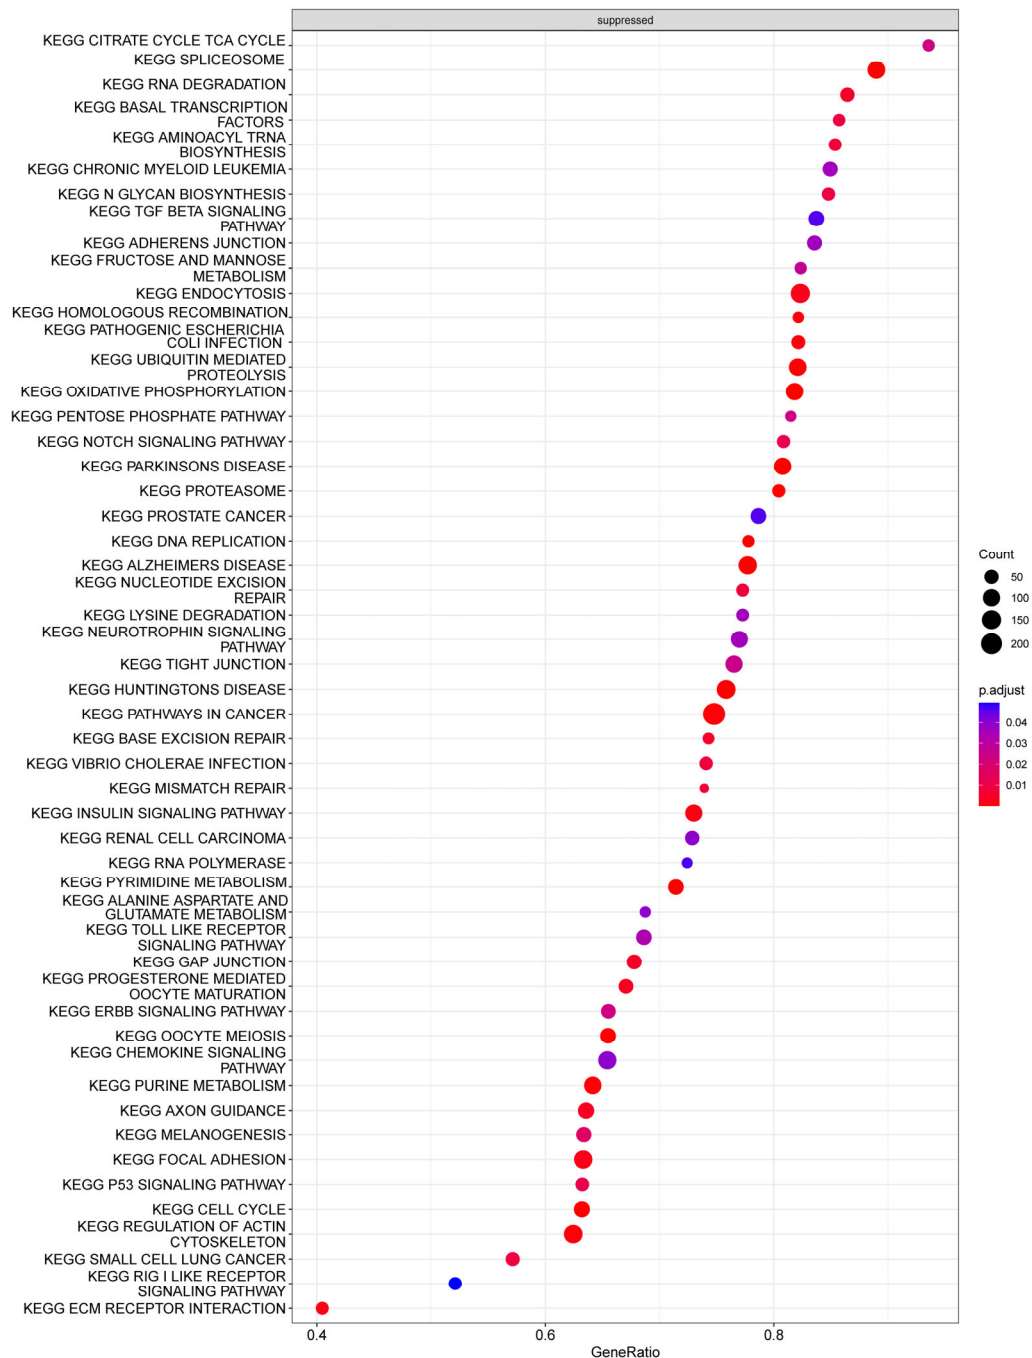

**Figure S5** The result of GSEA between the cluster1 and the cluster2.

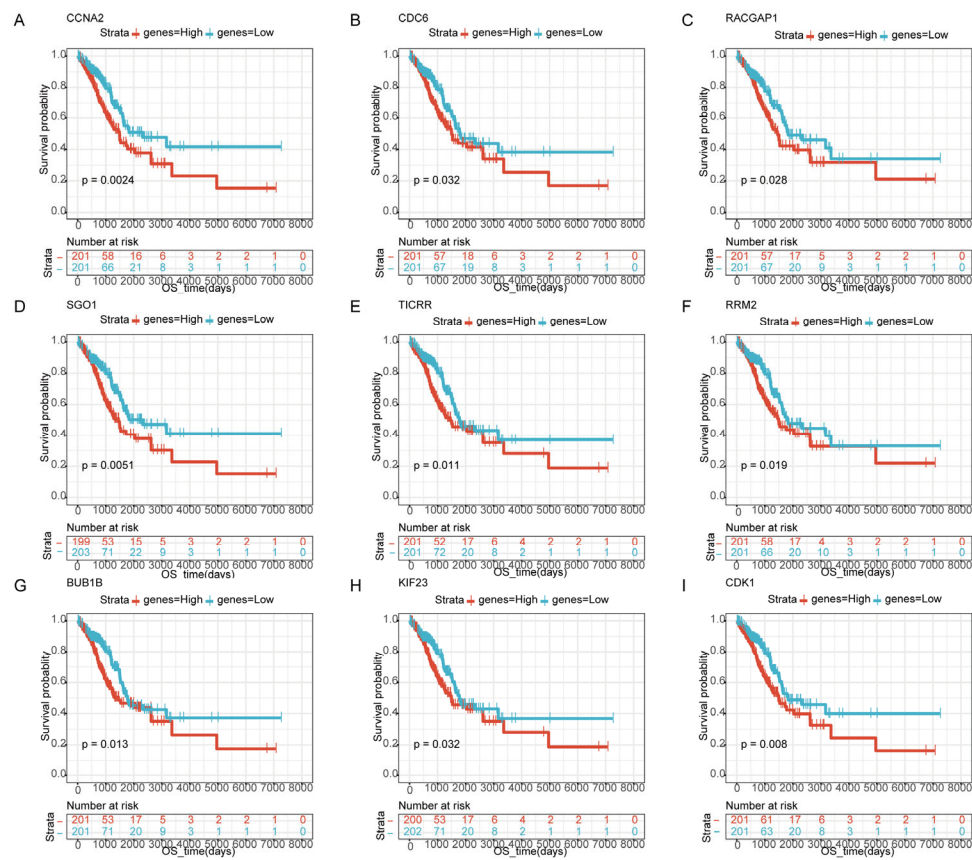

**Figure S6** Detailed results of survival analysis (Kaplan–Meier) for OS in early-stage TCGA-LUAD. (A-I) Kaplan–Meier analysis shows the association between the expression of the 9 hub gene and early-stage LUAD patient overall survival (OS) in TCGA cohort.

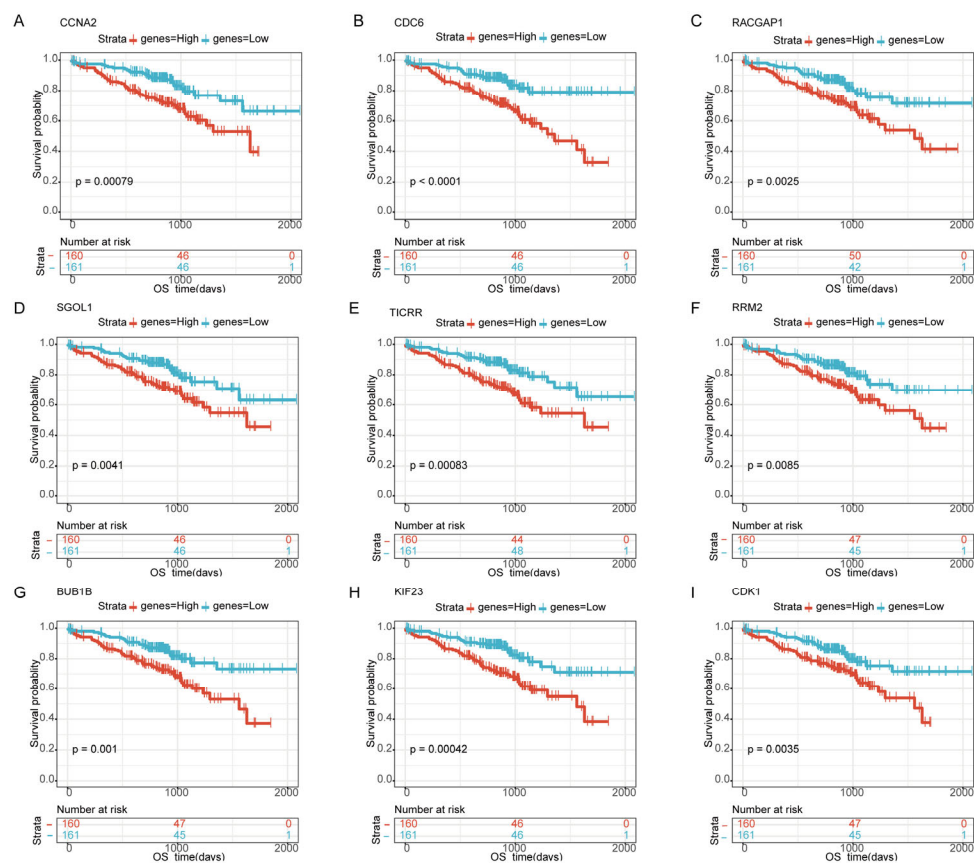

**Figure S7** Detailed results of survival analysis (Kaplan–Meier) for OS in GSE72094. (A–I) Kaplan–Meier analysis shows the association between the expression of the 9 hub gene and early-stage LUAD patient overall survival (OS) in GSE72094.

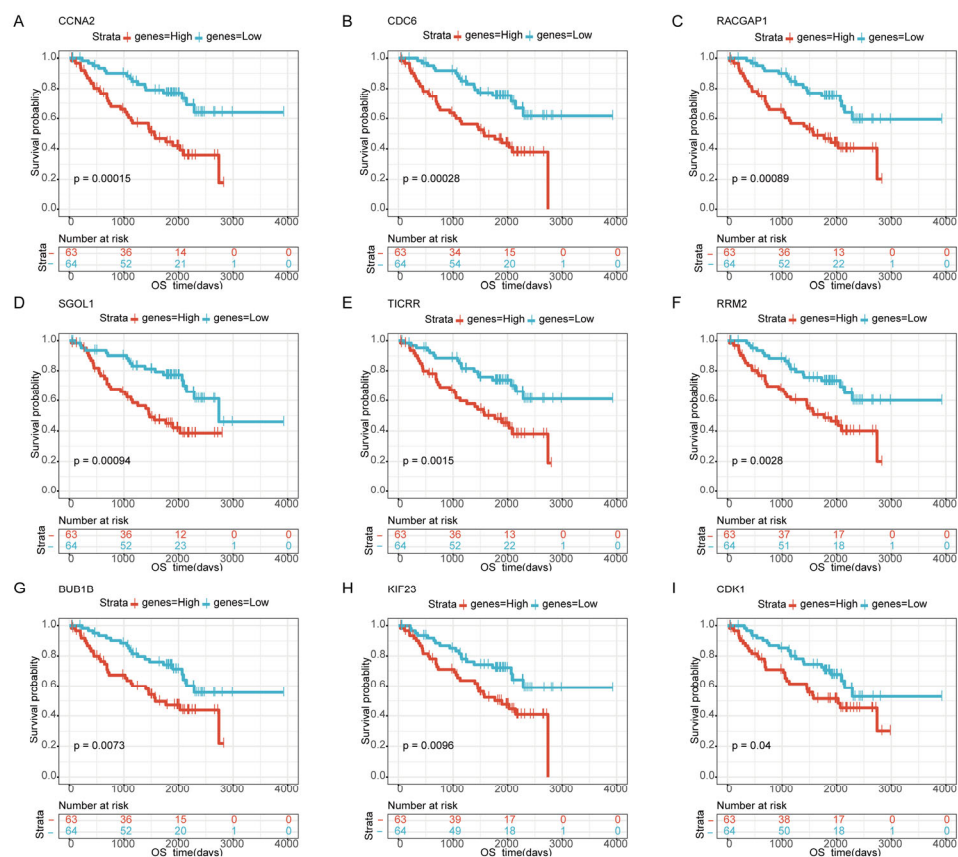

**Figure S8** Detailed results of survival analysis (Kaplan–Meier) for OS in GSE50081.(A-I) Kaplan–Meier analysis showing the association between the expression of 9 hub gene and early-stage LUAD patient overall survival (OS) in GSE50081.



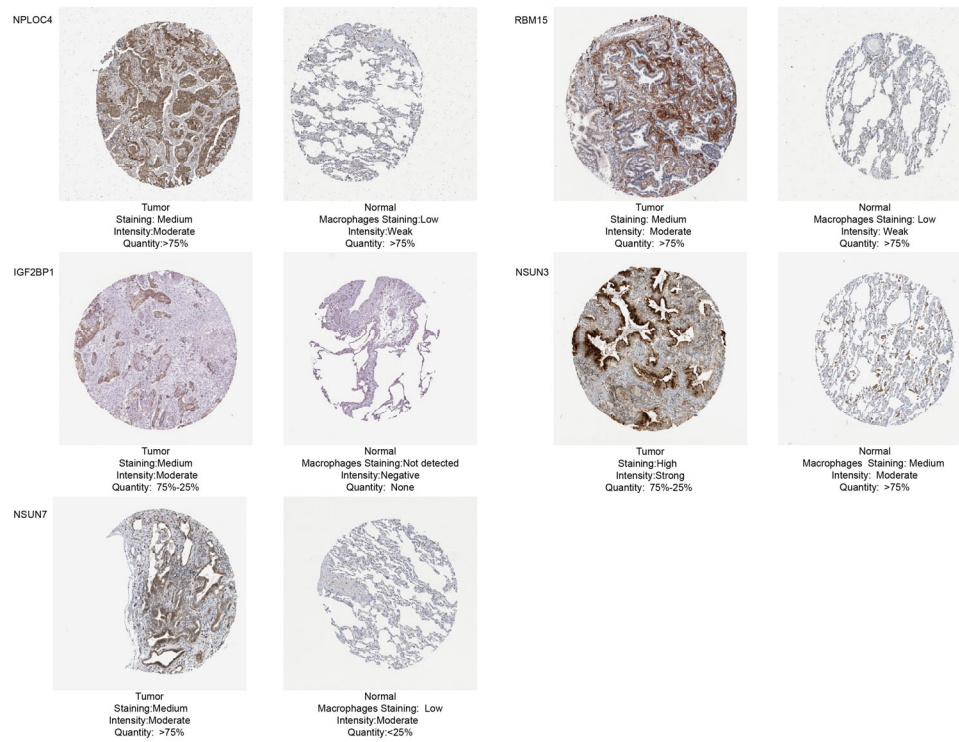

**Figure S9** The protein expression of 5 prognostic genes (NPLOC4, RBM15, IGF2BP1, NSUN3, and NSUN7) in immunohistochemical images of lung tumor (left) and normal(right) groups.
