# Supplementary material for: Prognostic Value and Genome Signature of m6A/m5C Regulated Genes in Early-Stage Lung Adenocarcinoma
Source: Int J Mol Sci. 2023 Mar 30;24(7):6520. doi: 10.3390/ijms24076520 (PMC10095361; doi:10.3390/ijms24076520)
Supplement: Supplementary file 1 [file ijms-24-06520-s001.zip › Supplementary Tables.xls]

## Sheet: Table S1
Table S1 Clinical characteristics of patient in the TCGA-LUAD cohort
Clinical characteristics	Cluster 1 (N=240)	Cluster 2 (N=162)	P-value	High-risk (N=201)	Low-risk (N=201)	P-value
Age			0.669			0.712
>=60	175 (72.9%)	115 (71.0%)		144 (71.6%)	146 (72.6%)
<60	59 (24.6%)	44 (27.2%)		54 (26.7%)	49 (24.4%)
NA, n (%)	6(2.5%)	3(1.8%)		3 (1.5%)	6 (2.99%)
Gender			0.004			0.423
Female, n (%)	144 (60.0%)	73 (45.1%)		104 (51.7%)	113 (56.2%)
Male, n (%)	96 (40.0%)	89 (54.9%)		97 (48.3%)	88 (43.8%)
Stage			0.113			0.038
I, n (%)	176 (73.3%)	106 (65.4%)		131 (65.2%)	151 (75.1%)
II, n (%)	64 (26.7%)	56 (34.6%)		70 (34.8%)	50 (24.9%)
T-stage			0.064			0.035
T1, n (%)	103 (42.9%)	51 (31.5%)		66 (32.8%)	88 (43.8%)
T2, n (%)	120 (50.0%)	99 (61.1%)		116 (57.7%)	103 (51.2%)
T3, n (%)	17 (7.08%)	12 (7.41%)		19 (9.45%)	10 (4.98%)
N-stage			0.018			0.562
N0, n (%)	189 (78.8%)	126 (77.8%)		157 (78.1%)	158 (78.6%)
N1, n (%)	42 (17.5%)	36 (22.2%)		41 (20.4%)	37 (18.4%)
NX, n (%)	9 (3.75%)	0 (0.00%)		3 (1.49%)	6 (2.99%)
M-stage			1.000			0.719
M0, n (%)	165 (68.8%)	112 (69.1%)		141 (70.1%)	136 (67.7%)
MX, n (%)	73 (30.4%)	49 (30.3%)		59 (29.4%)	63 (31.3%)
NA, n (%)	2(0.8%)	1(0.6%)		1(0.5%)	2 (1.00%)
Tissue origine			0.429			0.351
Lower lobe	83 (34.6%)	45 (27.8%)		56 (27.9%)	72 (35.8%)
Middle lobe	9 (3.75%)	6 (3.70%)		9 (4.48%)	6 (2.99%)
Other	7 (2.92%)	3 (1.85%)		5 (2.49%)	5 (2.49%)
Upper lobe	141 (58.8%)	108 (66.7%)		131 (65.2%)	118 (58.7%)
Smoking Status			0.131			0.281
smoke, n (%)	158 (65.8%)	119 (73.5%)		144 (71.6%)	133 (66.2%)
non-smoke, n (%)	82 (34.2%)	43 (26.5%)		57 (28.4%)	68 (33.8%)
Race			0.323			0.884
american indian or alaska native	0 (0.00%)	1 (0.62%)		0 (0.00%)	1 (0.50%)
asian	3 (1.25%)	2 (1.23%)		2 (1.00%)	3 (1.49%)
black or african american	25 (10.4%)	18 (11.1%)		22 (10.9%)	21 (10.4%)
Unknown	19 (7.92%)	21 (13.0%)		22 (10.9%)	18 (8.96%)
white	193 (80.4%)	120 (74.1%)		155 (77.1%)	158 (78.6%)
OS_Status			0.012			0.039
Alive, n (%)	179 (74.6%)	101 (62.3%)		130 (64.7%)	150 (74.6%)
Dead, n (%)	61 (25.4%)	61 (37.7%)		71 (35.3%)	51 (25.4%)
Median TMB （mutations/Mb）			<0.001			0.064
TMB>=10, n (%)	109 (45.4%)	42 (25.9%)		16 (17.8%)	6 (3.0%)
TMB<10, n (%)	7 (2.9%)	15 (9.3%)		74 (82.2%)	77 (38.3%)
NA, n (%)	124（51.7%）	105（64.8%）		111（55.2%）	118（58.7%）
mOS (days)	2318	1288	0.038	1421	2318	0.038

## Sheet: Table S2
Table S2 Clinical characteristics of patient in the GSE50081 cohort
Clinical characteristics	High-risk (N=63)	Low-risk (N=64)	P-value
Age			1.000
>=60	54 (85.7%)	54 (84.4%)
<60	9 (14.3%)	10 (15.6%)
Gender			0.928
Female, n (%)	30 (47.6%)	32 (50.0%)
Male, n (%)	33 (52.4%)	32 (50.0%)
Stage			0.005
I, n (%)	38 (60.3%)	54 (84.4%)
II, n (%)	25 (39.7%)	10 (15.6%)
T-stage			0.031
T1, n (%)	15 (23.8%)	28 (43.8%)
T2, n (%)	47 (74.6%)	35 (54.7%)
T3, n (%)	1 (1.59%)	1 (1.56%)
N-stage			0.004
N0, n (%)	39 (61.9%)	55 (85.9%)
N1, n (%)	24 (38.1%)	9 (14.1%)
M-stage			.
M0, n (%)	63 (100%)	64 (100%)
Smoking Status			0.929
Current , n (%)	18 (28.6%)	18 (28.1%)
Ex-smoker , n (%)	29 (46.0%)	27 (42.2%)
Never , n (%)	10 (15.9%)	13 (20.3%)
Unable to determine, n (%)	6 (9.52%)	6 (9.38%)
OS_Status			0.060
Alive, n (%)	32 (50.8%)	44 (68.8%)
Dead, n (%)	31 (49.2%)	20 (31.2%)
mOS(days)	1748	2778	0.022
mDFS (days)	1406	2777	0.005
Recurrence			0.458
No, n (%)	40 (63.5%)	47 (73.4%)
Unknown, n (%)	2 (3.17%)	1 (1.56%)
Yes, n (%)	21 (33.3%)	16 (25.0%)

## Sheet: Table S3
Table S3 Clinical characteristics of patient in the GSE72094 cohort
Clinical characteristics	High-risk (N=160)	Low-risk (N=161)	P-value
Age			1.000
>-60	137 (85.6%)	137 (85.1%)
<60	23 (14.4%)	24 (14.9%)
Gender			0.692
Female, n (%)	89 (55.6%)	85 (52.8%)
Male, n (%)	71 (44.4%)	76 (47.2%)
Stage			0.051
I, n (%)	119 (74.4%)	135 (83.9%)
II, n (%)	41 (25.6%)	26 (16.1%)
NA, n (%)
Smoking Status			0.471
Ever, n (%)	126 (78.8%)	118 (73.3%)
Never, n (%)	11 (6.88%)	16 (9.94%)
Missing, n (%)	23 (14.4%)	27 (16.8%)
RACE			0.664
Black, n (%)	5 (3.12%)	3 (1.86%)
White, n (%)	151 (94.4%)	155 (96.3%)
Other, n (%)	4 (2.50%)	3 (1.86%)
OS_Status			0.017
Alive, n (%)	112 (70.0%)	132 (82.0%)
Dead, n (%)	48 (30.0%)	29 (18.0%)
mOS (days)	1629	NA	0.119

## Sheet: Table S4
Table S4 Gene Ontology (GO) enrichment analysis of cluster-specific genes.
ONTOLOGY	ID	Description	GeneRatio	BgRatio	pvalue	p.adjust	qvalue	geneID	Count
BP	GO:0000280	nuclear division	106/1183	446/18800	6.50911e-34	3.30923e-30	2.96952e-30	MYBL2,KIF18B,UBE2C,KIF4A,TPX2,ESPL1,SMC1B,KIF2C,CDC20,AURKB,TTK,KIFC1,NCAPH,RAD54L,CCNE1,NEK2,TOP2A,DLGAP5,PRAP1,CDC6,PLK1,CDCA5,MEIOC,KIF23,NDC80,NCAPG,NUF2,BUB1,DMRTC2,ANLN,CDCA8,HOXA13,PKMYT1,TEX15,CDC25C,MKI67,KIF14,BUB1B,AURKA,CDT1,ASPM,TRIP13,SPAG5,CCNB2,TDRD12,ZWINT,CENPF,RAD51AP1,EME1,SGO1,PRC1,MAD2L1,KIF15,KIF11,CENPE,CCNB1,CDCA2,UBE2S,RACGAP1,TEX19,RAD51,DSCC1,PSRC1,CHEK1,SYCP2,HASPIN,N…	106
BP	GO:0007059	chromosome segregation	90/1183	348/18800	7.05883e-32	1.79435e-28	1.61016e-28	KIF18B,UBE2C,KIF4A,ESPL1,SMC1B,KIF2C,CDC20,AURKB,TTK,HJURP,KIFC1,NCAPH,CCNE1,NEK2,TOP2A,DLGAP5,FAM83D,PRAP1,CDC6,PLK1,CDCA5,MEIOC,KIF23,NDC80,NCAPG,NUF2,BUB1,SKA1,CDCA8,TEX15,MKI67,KIF14,BUB1B,CDT1,TRIP13,SPAG5,ZWINT,CENPF,CENPW,EME1,SGO1,PRC1,MAD2L1,CENPE,SKA3,CCNB1,SPC25,CDCA2,OIP5,RACGAP1,DSCC1,PSRC1,SYCP2,HASPIN,NUSAP1,BRIP1,KNL1,ECT2,BRCA1,ESCO2,SPC24,TACC3,NCAPG2,INCENP,KIF18A,NCAPD2,DDX12P…	90
BP	GO:0048285	organelle fission	108/1183	493/18800	3.27433e-31	5.54889e-28	4.97927e-28	MYBL2,KIF18B,UBE2C,KIF4A,TPX2,ESPL1,SMC1B,KIF2C,CDC20,AURKB,TTK,KIFC1,NCAPH,RAD54L,CCNE1,NEK2,TOP2A,DLGAP5,PRAP1,CDC6,PLK1,CDCA5,MEIOC,KIF23,NDC80,NCAPG,NUF2,BUB1,DMRTC2,ANLN,CDCA8,MTFR2,HOXA13,PKMYT1,TEX15,CDC25C,MKI67,KIF14,BUB1B,AURKA,CDT1,ASPM,TRIP13,SPAG5,CCNB2,TDRD12,ZWINT,CENPF,RAD51AP1,EME1,SGO1,PRC1,MAD2L1,KIF15,KIF11,CENPE,CCNB1,CDCA2,UBE2S,RACGAP1,TEX19,RAD51,DSCC1,PSRC1,CHEK1,SYCP2,HA…	108
BP	GO:0098813	nuclear chromosome segregation	79/1183	287/18800	4.37869e-30	5.56531e-27	4.99401e-27	KIF18B,UBE2C,KIF4A,ESPL1,SMC1B,KIF2C,CDC20,AURKB,TTK,KIFC1,NCAPH,CCNE1,NEK2,TOP2A,DLGAP5,FAM83D,PRAP1,CDC6,PLK1,CDCA5,MEIOC,KIF23,NDC80,NCAPG,NUF2,BUB1,CDCA8,TEX15,KIF14,BUB1B,CDT1,TRIP13,SPAG5,ZWINT,CENPF,EME1,SGO1,PRC1,MAD2L1,CENPE,CCNB1,SPC25,RACGAP1,DSCC1,PSRC1,SYCP2,HASPIN,NUSAP1,BRIP1,KNL1,ECT2,ESCO2,SPC24,TACC3,NCAPG2,INCENP,KIF18A,NCAPD2,DDX12P,SGO2,FEN1,P3H4,PTTG1,FBXO5,KNTC1,PSMC3IP,CCN…	79
BP	GO:0140014	mitotic nuclear division	73/1183	293/18800	5.95759e-25	6.05768e-22	5.43583e-22	MYBL2,KIF18B,UBE2C,KIF4A,TPX2,ESPL1,SMC1B,KIF2C,CDC20,AURKB,TTK,KIFC1,NCAPH,NEK2,DLGAP5,PRAP1,CDC6,PLK1,CDCA5,KIF23,NDC80,NCAPG,NUF2,BUB1,ANLN,CDCA8,HOXA13,PKMYT1,CDC25C,MKI67,KIF14,BUB1B,AURKA,CDT1,TRIP13,SPAG5,ZWINT,CENPF,SGO1,PRC1,MAD2L1,KIF15,KIF11,CENPE,CCNB1,CDCA2,UBE2S,RACGAP1,DSCC1,PSRC1,CHEK1,HASPIN,NUSAP1,SPHK1,TACC3,NCAPG2,KIF18A,NCAPD2,SGO2,PTTG1,FBXO5,KNTC1,CENPK,CHEK2,MTBP,KIF20B,TU…	73
BP	GO:0006261	DNA-templated DNA replication	52/1183	159/18800	5.13019e-24	4.34698e-21	3.90075e-21	CDC45,MCM10,CCNE1,TICRR,CDC6,POLQ,HMGA1,ORC1,E2F7,CDT1,GINS1,RECQL4,MCM2,EME1,GINS4,ORC6,RAD51,DSCC1,GINS2,E2F8,MCM4,TIMELESS,WDHD1,TONSL,RFC4,BLM,DNA2,POLE2,TRAIP,MCM7,FEN1,PRIM1,MCM6,CDC7,FBXO5,DBF4B,CHTF18,CCNE2,DDX11,GINS3,POLE,MCM3,ATAD5,PCNA,RFC5,CDK2,GMNN,TOPBP1,DBF4,RFC3,MCM5,ALYREF	52
BP	GO:0000819	sister chromatid segregation	59/1183	205/18800	7.76303e-24	5.63817e-21	5.05939e-21	KIF18B,UBE2C,KIF4A,ESPL1,SMC1B,KIF2C,CDC20,AURKB,TTK,KIFC1,NCAPH,NEK2,TOP2A,DLGAP5,PRAP1,CDC6,PLK1,CDCA5,KIF23,NDC80,NCAPG,NUF2,BUB1,CDCA8,KIF14,BUB1B,CDT1,TRIP13,SPAG5,ZWINT,CENPF,SGO1,PRC1,MAD2L1,CENPE,CCNB1,RACGAP1,DSCC1,PSRC1,HASPIN,NUSAP1,ESCO2,TACC3,NCAPG2,KIF18A,NCAPD2,DDX12P,SGO2,FEN1,PTTG1,FBXO5,KNTC1,CENPK,DDX11,RMI2,TUBG1,SPDL1,KNSTRN,NCAPD3	59
BP	GO:0000070	mitotic sister chromatid segregation	53/1183	171/18800	3.29459e-23	2.09371e-20	1.87878e-20	KIF18B,UBE2C,KIF4A,ESPL1,SMC1B,KIF2C,CDC20,AURKB,TTK,KIFC1,NCAPH,NEK2,DLGAP5,PRAP1,CDC6,PLK1,CDCA5,KIF23,NDC80,NCAPG,NUF2,BUB1,CDCA8,KIF14,BUB1B,CDT1,TRIP13,SPAG5,ZWINT,CENPF,SGO1,PRC1,MAD2L1,CENPE,CCNB1,RACGAP1,DSCC1,PSRC1,HASPIN,NUSAP1,TACC3,NCAPG2,KIF18A,NCAPD2,SGO2,PTTG1,FBXO5,KNTC1,CENPK,TUBG1,SPDL1,KNSTRN,NCAPD3	53
BP	GO:0006260	DNA replication	67/1183	280/18800	6.10685e-22	3.44969e-19	3.09556e-19	CDC45,MCM10,CCNE1,TICRR,CDC6,POLQ,RRM2,HMGA1,ORC1,E2F7,CDT1,CCNA2,GINS1,RECQL4,MCM2,EME1,PIF1,CDK1,GINS4,ORC6,RAD51,DSCC1,GINS2,E2F8,CHEK1,MCM4,TIMELESS,WDHD1,DTL,TONSL,RFC4,ESCO2,BLM,PCLAF,DNA2,POLE2,STRA8,TRAIP,MCM7,FEN1,FAM111B,PRIM1,MCM6,CDC7,FBXO5,DBF4B,CHTF18,CCNE2,DDX11,GINS3,CHAF1B,POLE,RMI2,MCM3,RNASEH2A,ATAD5,PCNA,RFC5,CHAF1A,CDK2,GMNN,TOPBP1,ACTL6A,DBF4,RFC3,MCM5,ALYREF	67
BP	GO:0051321	meiotic cell cycle	65/1183	266/18800	7.55982e-22	3.84341e-19	3.44887e-19	ESPL1,SMC1B,CDC20,TTK,NCAPH,RAD54L,CCNE1,NEK2,TOP2A,EXO1,PLK1,MEIOC,NDC80,NUF2,BUB1,DMRTC2,PKMYT1,TEX15,CDC25C,BUB1B,AURKA,ASPM,TRIP13,CCNB2,TDRD12,RAD51AP1,EME1,SGO1,CDC25A,XRCC2,DUSP13,TEX19,RAD51,SYCP2,PIWIL3,BRIP1,BRDT,INCENP,STRA8,KIF18A,NCAPD2,SGO2,P3H4,PTTG1,FBXO5,FANCA,PSMC3IP,CCNE2,DMC1,MAEL,PLCB1,MEI4,MND1,TUBG1,RAD54B,H2AX,PIWIL2,CDK2,HSPA2,FBXO43,OVOL1,HSF2BP,NDC1,FANCD2,NCAPD3	65
BP	GO:1903046	meiotic cell cycle process	56/1183	207/18800	2.94798e-21	1.3625e-18	1.22264e-18	ESPL1,CDC20,TTK,NCAPH,RAD54L,CCNE1,TOP2A,PLK1,MEIOC,NDC80,NUF2,BUB1,DMRTC2,TEX15,CDC25C,BUB1B,AURKA,ASPM,TRIP13,CCNB2,TDRD12,RAD51AP1,EME1,SGO1,CDC25A,TEX19,RAD51,SYCP2,BRIP1,BRDT,INCENP,STRA8,KIF18A,NCAPD2,SGO2,P3H4,PTTG1,FBXO5,FANCA,PSMC3IP,CCNE2,DMC1,MAEL,PLCB1,MEI4,MND1,TUBG1,RAD54B,PIWIL2,HSPA2,FBXO43,OVOL1,HSF2BP,NDC1,FANCD2,NCAPD3	56
BP	GO:0140013	meiotic nuclear division	50/1183	188/18800	9.00922e-19	3.81691e-16	3.42509e-16	ESPL1,CDC20,TTK,NCAPH,RAD54L,CCNE1,TOP2A,PLK1,MEIOC,NDC80,NUF2,BUB1,DMRTC2,TEX15,BUB1B,AURKA,ASPM,TRIP13,CCNB2,TDRD12,RAD51AP1,EME1,SGO1,TEX19,RAD51,SYCP2,BRIP1,BRDT,INCENP,STRA8,KIF18A,SGO2,P3H4,PTTG1,FBXO5,FANCA,PSMC3IP,CCNE2,DMC1,MAEL,PLCB1,MEI4,MND1,RAD54B,PIWIL2,HSPA2,FBXO43,HSF2BP,NDC1,FANCD2	50
BP	GO:0044772	mitotic cell cycle phase transition	78/1183	440/18800	5.24628e-17	2.0517e-14	1.84108e-14	HMGA2,UBE2C,ESPL1,FOXM1,AURKB,TTK,CCNE1,DLGAP5,TICRR,PRAP1,CDC6,PLK1,CDCA5,CLSPN,NDC80,MELK,GTSE1,BUB1,ANLN,RRM2,PKMYT1,CDC25C,KIF14,BUB1B,CDKN3,ORC1,AURKA,E2F7,CDT1,CCNA2,TRIP13,CCNB2,ZWINT,IQGAP3,CENPF,E2F1,CDC25A,MAD2L1,CENPE,CCNB1,CDK1,USH1C,UBE2S,KCNH5,TERT,CHEK1,DTL,STIL,BRCA1,BLM,TM4SF5,TACC3,CKS1B,EZH2,EIF4EBP1,CCNP,CDKN2A,CCNF,CDC7,FBXO5,DBF4B,KNTC1,CCNE2,SKP2,CHEK2,MTBP,PLCB1,POLE,ATAD5…	78
BP	GO:0032508	DNA duplex unwinding	32/1183	90/18800	1.68622e-16	6.12339e-14	5.49479e-14	CDC45,RAD54L,TOP2A,POLQ,HMGA1,GINS1,RECQL4,MCM2,ERCC6L,PIF1,GINS4,RAD51,DSCC1,GINS2,MCM4,RFC4,BRIP1,BLM,DNA2,DDX12P,MCM8,MCM7,MCM6,CHTF18,DDX11,GINS3,RAD54B,MCM3,DQX1,RFC5,RFC3,MCM5	32
BP	GO:0007346	regulation of mitotic cell cycle	80/1183	478/18800	6.25621e-16	2.12044e-13	1.90276e-13	HMGA2,UBE2C,ESPL1,AURKB,TTK,NEK2,DLGAP5,TICRR,PRAP1,CDC6,PLK1,CDCA5,MEIOC,CLSPN,NDC80,GTSE1,BUB1,ANLN,RRM2,HOXA13,PKMYT1,CDC25C,MKI67,KIF14,BUB1B,ORC1,AURKA,E2F7,CDT1,TRIP13,ZWINT,CENPF,E2F1,EME1,CDC25A,MAD2L1,CENPE,WDR62,CCNB1,CDK1,CDCA2,KCNH5,TERT,FOXG1,CHEK1,NUSAP1,DTL,STIL,BRCA1,BLM,SPHK1,TM4SF5,CKS1B,EZH2,EIF4EBP1,CDKN2A,CDC7,FBXO5,DBF4B,KNTC1,CHEK2,MTBP,PLCB1,KIF20B,ATAD5,SPDL1,CDK2,GMNN,HS…	80
BP	GO:1901987	regulation of cell cycle phase transition	73/1183	415/18800	8.3423e-16	2.65076e-13	2.37865e-13	HMGA2,UBE2C,ESPL1,AURKB,TTK,CDC45,DLGAP5,TICRR,FAM83D,PRAP1,CDC6,PLK1,CDCA5,CLSPN,NDC80,GTSE1,BUB1,ANLN,RRM2,CDC25C,KIF14,BUB1B,ORC1,AURKA,E2F7,CDT1,TRIP13,ZWINT,CENPF,E2F1,EME1,CDC25A,MAD2L1,CENPE,CCNB1,CDK1,KCNH5,TERT,CHEK1,TIMELESS,DTL,STIL,BRIP1,BRCA1,BLM,DNA2,TM4SF5,EZH2,CDKN2A,CDC7,SOX2,FBXO5,DBF4B,KNTC1,CHEK2,MTBP,PLCB1,ATAD5,H2AX,SPDL1,CDK2,HSPA2,TOPBP1,SIX3,OVOL1,DBF4,CDK4,WDR76,UBD,SUSD…	73
BP	GO:0048562	embryonic organ morphogenesis	59/1183	294/18800	1.20358e-15	3.59941e-13	3.22992e-13	HOXB9,HOXB8,HOXC11,DLX6,HOXC9,COL11A1,SHOX2,ALX1,HOXA11,COL2A1,ZIC1,HOXA1,HOXB7,CHRNA9,USH1C,HOXC4,MDFI,FOXG1,HOXA9,STIL,SMO,CTHRC1,HOXD10,STRA6,OTX1,ALX3,USH1G,FOXE1,RBPMS2,HOXB6,HOXA3,NDRG4,TWIST1,GJB6,HOXA6,DLX5,MFAP5,GBX2,FOXH1,SIX2,LHFPL5,LHX1,EPHB2,HOXD9,HOXB5,MFAP2,NKX3-2,HOXA7,MMP14,SIX3,TBX1,SCRIB,TH,GRHL3,OSR2,TBX18,WNT16,VAX2,VANGL2	59
BP	GO:0045787	positive regulation of cell cycle	63/1183	329/18800	1.35004e-15	3.81312e-13	3.42169e-13	MAGEA4,UBE2C,ESPL1,AURKB,DLGAP5,FAM83D,PRAP1,CDC6,CDCA5,MEIOC,KIF23,NDC80,RRM2,HOXA13,CDC25C,KIF14,AURKA,E2F7,CDT1,SPAG5,RAD51AP1,CDC25A,MAD2L1,CCNB1,CDK1,RACGAP1,TERT,E2F8,FOXG1,PSRC1,CHEK1,NUSAP1,DTL,PLK4,STIL,ECT2,CDK5R2,SPHK1,CKS1B,EZH2,EIF4EBP1,STRA8,FEN1,CDC7,FBXO5,DBF4B,DDX11,SOX15,CHEK2,MTBP,PLCB1,KIF20B,FOSL1,ATAD5,PIWIL2,RANBP1,HSPA2,FOXA1,OVOL1,DBF4,CDK4,SASS6,IGF2	63
BP	GO:0032392	DNA geometric change	32/1183	96/18800	1.4437e-15	3.86304e-13	3.46648e-13	CDC45,RAD54L,TOP2A,POLQ,HMGA1,GINS1,RECQL4,MCM2,ERCC6L,PIF1,GINS4,RAD51,DSCC1,GINS2,MCM4,RFC4,BRIP1,BLM,DNA2,DDX12P,MCM8,MCM7,MCM6,CHTF18,DDX11,GINS3,RAD54B,MCM3,DQX1,RFC5,RFC3,MCM5	32
BP	GO:0061982	meiosis I cell cycle process	38/1183	136/18800	2.35193e-15	5.9786e-13	5.36487e-13	ESPL1,RAD54L,CCNE1,TOP2A,PLK1,MEIOC,NDC80,DMRTC2,TEX15,CDC25C,AURKA,TRIP13,CCNB2,RAD51AP1,EME1,SGO1,CDC25A,TEX19,RAD51,SYCP2,BRIP1,BRDT,SGO2,P3H4,PTTG1,FBXO5,PSMC3IP,CCNE2,DMC1,MAEL,MEI4,MND1,RAD54B,PIWIL2,HSPA2,HSF2BP,NDC1,FANCD2	38
BP	GO:0090068	positive regulation of cell cycle process	52/1183	247/18800	7.87165e-15	1.90569e-12	1.71006e-12	UBE2C,ESPL1,AURKB,DLGAP5,FAM83D,PRAP1,CDC6,CDCA5,KIF23,NDC80,RRM2,HOXA13,CDC25C,KIF14,AURKA,E2F7,CDT1,SPAG5,RAD51AP1,CDC25A,MAD2L1,CCNB1,CDK1,RACGAP1,TERT,E2F8,NUSAP1,DTL,PLK4,STIL,ECT2,SPHK1,EZH2,STRA8,FEN1,CDC7,FBXO5,DBF4B,DDX11,SOX15,CHEK2,MTBP,PLCB1,KIF20B,ATAD5,PIWIL2,RANBP1,HSPA2,DBF4,CDK4,SASS6,IGF2	52
BP	GO:0006270	DNA replication initiation	20/1183	38/18800	9.16296e-15	2.11748e-12	1.90011e-12	CDC45,MCM10,CCNE1,TICRR,CDC6,ORC1,CDT1,MCM2,ORC6,MCM4,MCM7,PRIM1,MCM6,CCNE2,GINS3,MCM3,CDK2,GMNN,TOPBP1,MCM5	20
BP	GO:0044786	cell cycle DNA replication	21/1183	43/18800	1.39172e-14	2.96766e-12	2.66302e-12	CDC45,E2F7,CDT1,GINS1,MCM2,RAD51,E2F8,MCM4,BLM,DNA2,FEN1,MCM6,CDC7,FBXO5,DBF4B,GINS3,MCM3,ATAD5,PCNA,GMNN,DBF4	21
BP	GO:0071103	DNA conformation change	32/1183	103/18800	1.40094e-14	2.96766e-12	2.66302e-12	CDC45,RAD54L,TOP2A,POLQ,HMGA1,GINS1,RECQL4,MCM2,ERCC6L,PIF1,GINS4,RAD51,DSCC1,GINS2,MCM4,RFC4,BRIP1,BLM,DNA2,DDX12P,MCM8,MCM7,MCM6,CHTF18,DDX11,GINS3,RAD54B,MCM3,DQX1,RFC5,RFC3,MCM5	32
BP	GO:0007127	meiosis I	36/1183	130/18800	1.73476e-14	3.52781e-12	3.16566e-12	ESPL1,RAD54L,CCNE1,TOP2A,PLK1,MEIOC,NDC80,DMRTC2,TEX15,AURKA,TRIP13,CCNB2,RAD51AP1,EME1,SGO1,TEX19,RAD51,SYCP2,BRIP1,BRDT,SGO2,P3H4,PTTG1,FBXO5,PSMC3IP,CCNE2,DMC1,MAEL,MEI4,MND1,RAD54B,PIWIL2,HSPA2,HSF2BP,NDC1,FANCD2	36
BP	GO:0048568	embryonic organ development	74/1183	449/18800	1.82913e-14	3.57666e-12	3.2095e-12	HOXB9,HOXB8,HOXC11,DLX6,HOXC9,TUBB2B,COL11A1,SHOX2,ALX1,HOXA11,COL2A1,ZIC1,HOXA1,HOXB7,E2F7,CHRNA9,USH1C,HOXC4,E2F8,MDFI,FOXG1,HOXA9,PLK4,STIL,SMO,CTHRC1,HOXD10,STRA6,OTX1,ALX3,USH1G,FOXE1,ADM,RBPMS2,HOXB6,HOXA3,NDRG4,TWIST1,GJB6,HOXA6,DLX5,MFAP5,PITX2,GBX2,SOX15,FOXH1,SIX2,LHFPL5,LHX1,POLE,EPHB2,HOXD9,CDX2,HOXB5,CXCL8,MFAP2,NKX3-2,HOXA7,MMP14,SIX3,ADA,TBX1,SCRIB,TH,ASCL2,GRHL3,OSR2,TBX18,WNT16,P…	74
BP	GO:0051783	regulation of nuclear division	37/1183	139/18800	2.9504e-14	5.55549e-12	4.9852e-12	ESPL1,CDC20,AURKB,TTK,NEK2,DLGAP5,PRAP1,PLK1,NDC80,BUB1,HOXA13,PKMYT1,CDC25C,MKI67,BUB1B,AURKA,CDT1,TRIP13,ZWINT,CENPF,RAD51AP1,MAD2L1,CCNB1,CDCA2,CHEK1,NUSAP1,SPHK1,STRA8,FBXO5,KNTC1,MTBP,PLCB1,KIF20B,SPDL1,PIWIL2,FBXO43,IGF2	37
BP	GO:1901990	regulation of mitotic cell cycle phase transition	59/1183	321/18800	7.2089e-14	1.30893e-11	1.17456e-11	HMGA2,UBE2C,ESPL1,AURKB,TTK,DLGAP5,TICRR,PRAP1,CDC6,PLK1,CDCA5,CLSPN,NDC80,GTSE1,BUB1,ANLN,RRM2,CDC25C,KIF14,BUB1B,ORC1,AURKA,E2F7,CDT1,TRIP13,ZWINT,CENPF,E2F1,CDC25A,MAD2L1,CENPE,CCNB1,CDK1,KCNH5,TERT,CHEK1,DTL,STIL,BRCA1,BLM,TM4SF5,EZH2,CDKN2A,CDC7,FBXO5,DBF4B,KNTC1,CHEK2,MTBP,PLCB1,ATAD5,SPDL1,CDK2,HSPA2,TOPBP1,CDK4,UBD,PRKDC,SASS6	59
BP	GO:0006268	DNA unwinding involved in DNA replication	15/1183	22/18800	9.89664e-14	1.73498e-11	1.55688e-11	CDC45,HMGA1,GINS1,RECQL4,MCM2,GINS4,RAD51,GINS2,MCM4,BLM,MCM7,MCM6,GINS3,MCM3,MCM5	15
BP	GO:0090329	regulation of DNA-templated DNA replication	22/1183	52/18800	1.35852e-13	2.30224e-11	2.0659e-11	TICRR,E2F7,CDT1,GINS1,GINS4,DSCC1,GINS2,E2F8,TIMELESS,RFC4,BLM,CDC7,FBXO5,DBF4B,CHTF18,GINS3,PCNA,RFC5,CDK2,GMNN,DBF4,RFC3	22
BP	GO:0007088	regulation of mitotic nuclear division	32/1183	111/18800	1.45266e-13	2.38235e-11	2.1378e-11	ESPL1,AURKB,TTK,NEK2,DLGAP5,PRAP1,PLK1,NDC80,BUB1,HOXA13,PKMYT1,CDC25C,MKI67,BUB1B,AURKA,CDT1,TRIP13,ZWINT,CENPF,MAD2L1,CCNB1,CDCA2,CHEK1,NUSAP1,SPHK1,FBXO5,KNTC1,MTBP,KIF20B,SPDL1,FBXO43,IGF2	32
BP	GO:0000075	cell cycle checkpoint signaling	39/1183	170/18800	1.07391e-12	1.70617e-10	1.53102e-10	HMGA2,AURKB,TTK,CDC45,TICRR,PRAP1,CDC6,PLK1,CLSPN,NDC80,GTSE1,BUB1,BUB1B,ORC1,CDT1,TRIP13,ZWINT,CENPF,E2F1,EME1,MAD2L1,CCNB1,CDK1,CHEK1,TIMELESS,DTL,BRIP1,BRCA1,BLM,DNA2,KNTC1,CHEK2,H2AX,SPDL1,CDK2,TOPBP1,WDR76,PRKDC,FANCD2	39
BP	GO:0044839	cell cycle G2/M phase transition	37/1183	155/18800	1.13094e-12	1.74233e-10	1.56347e-10	HMGA2,FOXM1,AURKB,TICRR,CDC6,PLK1,CLSPN,NDC80,MELK,PKMYT1,CDC25C,KIF14,ORC1,AURKA,CCNA2,CCNB2,CENPF,CDC25A,CCNB1,CDK1,USH1C,KCNH5,CHEK1,DTL,BRCA1,BLM,CDC7,FBXO5,DBF4B,SKP2,CHEK2,PLCB1,ATAD5,CDK2,HSPA2,TOPBP1,CDK4	37
BP	GO:0048706	embryonic skeletal system development	33/1183	127/18800	1.51262e-12	2.26181e-10	2.02963e-10	HOXB9,HOXB8,HOXC11,HOXC6,HOXC9,COL11A1,SHOX2,ALX1,HOXA11,COL2A1,HOXA1,HOXB7,HOXC4,MDFI,HOXA9,HOXD10,ALX3,HOXB6,HOXA3,TWIST1,HOXA6,SULF1,SIX2,LHX1,HOXD9,HOXB5,NKX3-2,HOXA7,MMP14,TBX1,SLC2A10,OSR2,COL1A1	33
BP	GO:0048704	embryonic skeletal system morphogenesis	28/1183	94/18800	1.9896e-12	2.89004e-10	2.59336e-10	HOXB9,HOXB8,HOXC11,HOXC9,COL11A1,SHOX2,ALX1,HOXA11,COL2A1,HOXA1,HOXB7,HOXC4,MDFI,HOXA9,HOXD10,ALX3,HOXB6,HOXA3,TWIST1,HOXA6,SIX2,LHX1,HOXD9,HOXB5,HOXA7,MMP14,TBX1,OSR2	28
BP	GO:0033260	nuclear DNA replication	18/1183	38/18800	2.12165e-12	2.99625e-10	2.68867e-10	CDC45,CDT1,GINS1,MCM2,RAD51,MCM4,BLM,DNA2,FEN1,MCM6,CDC7,DBF4B,GINS3,MCM3,ATAD5,PCNA,GMNN,DBF4	18
BP	GO:1902850	microtubule cytoskeleton organization involved in mitosis	36/1183	151/18800	2.37499e-12	3.26336e-10	2.92836e-10	MYBL2,KIF4A,CENPA,TPX2,ESPL1,CDC20,AURKB,TTK,KIFC1,NEK2,DLGAP5,PLK1,KIF23,NDC80,NUF2,AURKA,PRC1,MAD2L1,KIF15,KIF11,CENPE,WDR62,CCNB1,SPC25,SAPCD2,RACGAP1,STMN1,PSRC1,NUSAP1,STIL,FSD1,TACC3,CHEK2,TUBG1,SPDL1,CENPH	36
BP	GO:0010965	regulation of mitotic sister chromatid separation	23/1183	65/18800	3.38781e-12	4.53254e-10	4.06725e-10	UBE2C,ESPL1,AURKB,TTK,DLGAP5,PRAP1,CDC6,PLK1,NDC80,BUB1,BUB1B,CDT1,TRIP13,ZWINT,CENPF,MAD2L1,CENPE,CCNB1,TACC3,PTTG1,FBXO5,KNTC1,SPDL1	23
BP	GO:0033045	regulation of sister chromatid segregation	24/1183	72/18800	5.06941e-12	6.60843e-10	5.93005e-10	UBE2C,ESPL1,AURKB,TTK,DLGAP5,PRAP1,CDC6,PLK1,NDC80,BUB1,BUB1B,CDT1,TRIP13,ZWINT,CENPF,MAD2L1,CENPE,CCNB1,TACC3,PTTG1,FBXO5,KNTC1,RMI2,SPDL1	24
BP	GO:0003002	regionalization	59/1183	354/18800	5.39089e-12	6.69822e-10	6.01061e-10	HOXB9,HOXC10,SP8,HOXB8,HOXC11,HOXA10,HOXC13,DLL3,HOXC6,HOXC9,HOXC8,FOXD1,HOXA11,SEMA3A,HOXB7,GREM1,TDRD5,AURKA,HOXD13,BARX1,FOXB1,XRCC2,HOXC4,MDFI,FOXG1,HOXA9,HOXD11,DKK1,SMO,TBR1,HOXD10,LRP4,OTX1,LHX2,HOXB6,HOXA3,HHIP,HOXA6,PITX2,IRX2,GBX2,FOXH1,SIX2,LHX1,IRX1,HOXD9,CDX2,HOXB5,HOXA7,WT1,FOXA1,SIX3,TBX1,TLL2,TBX18,HOXD8,PRKDC,VAX2,HES6	59
BP	GO:0051983	regulation of chromosome segregation	27/1183	91/18800	5.46752e-12	6.69822e-10	6.01061e-10	UBE2C,ESPL1,KIF2C,AURKB,TTK,DLGAP5,PRAP1,CDC6,PLK1,NDC80,BUB1,MKI67,BUB1B,CDT1,TRIP13,ZWINT,CENPF,MAD2L1,CENPE,CCNB1,CDCA2,TACC3,PTTG1,FBXO5,KNTC1,RMI2,SPDL1	27
BP	GO:0000086	G2/M transition of mitotic cell cycle	34/1183	140/18800	5.53354e-12	6.69822e-10	6.01061e-10	HMGA2,FOXM1,AURKB,TICRR,CDC6,PLK1,CLSPN,MELK,PKMYT1,CDC25C,KIF14,ORC1,AURKA,CCNA2,CENPF,CDC25A,CCNB1,CDK1,USH1C,KCNH5,CHEK1,DTL,BRCA1,BLM,CDC7,FBXO5,DBF4B,SKP2,CHEK2,PLCB1,CDK2,HSPA2,TOPBP1,CDK4	34
BP	GO:0007091	metaphase/anaphase transition of mitotic cell cycle	22/1183	62/18800	9.38267e-12	1.10934e-09	9.95459e-10	UBE2C,ESPL1,AURKB,TTK,DLGAP5,PRAP1,CDC6,PLK1,NDC80,BUB1,BUB1B,CDT1,TRIP13,ZWINT,CENPF,MAD2L1,CENPE,CCNB1,TACC3,FBXO5,KNTC1,SPDL1	22
BP	GO:0051306	mitotic sister chromatid separation	23/1183	68/18800	9.96896e-12	1.15187e-09	1.03362e-09	UBE2C,ESPL1,AURKB,TTK,DLGAP5,PRAP1,CDC6,PLK1,NDC80,BUB1,BUB1B,CDT1,TRIP13,ZWINT,CENPF,MAD2L1,CENPE,CCNB1,TACC3,PTTG1,FBXO5,KNTC1,SPDL1	23
BP	GO:0007093	mitotic cell cycle checkpoint signaling	32/1183	130/18800	1.58044e-11	1.78554e-09	1.60225e-09	HMGA2,AURKB,TTK,TICRR,PRAP1,CDC6,PLK1,CLSPN,NDC80,GTSE1,BUB1,BUB1B,ORC1,CDT1,TRIP13,ZWINT,CENPF,EME1,MAD2L1,CCNB1,CDK1,CHEK1,DTL,BRCA1,BLM,KNTC1,CHEK2,SPDL1,CDK2,TOPBP1,PRKDC,FANCD2	32
BP	GO:0006302	double-strand break repair	49/1183	273/18800	2.33986e-11	2.58606e-09	2.32059e-09	HMGA2,FOXM1,CDC45,RAD54L,CDCA5,MEIOC,AUNIP,POLQ,TEX15,TRIP13,RECQL4,MCM2,RAD51AP1,EME1,XRCC2,GINS4,RAD51,GINS2,CHEK1,MCM4,FANCB,TIMELESS,PARPBP,TONSL,BRIP1,BRCA1,ESCO2,BLM,DNA2,MCM8,MCM7,TWIST1,FEN1,MCM6,CDC7,DMC1,DDX11,CHEK2,RMI2,RAD54B,MCM3,H2AX,ACTL6A,HSF2BP,OTUB2,CGAS,MCM5,PRKDC,FANCD2	49
BP	GO:0010948	negative regulation of cell cycle process	52/1183	301/18800	2.5314e-11	2.73822e-09	2.45713e-09	HMGA2,ESPL1,AURKB,TTK,CDC45,NEK2,TICRR,PRAP1,CDC6,PLK1,CLSPN,NDC80,GTSE1,BUB1,BUB1B,ORC1,E2F7,CDT1,TRIP13,ZWINT,CENPF,E2F1,EME1,MAD2L1,CCNB1,CDK1,E2F8,CHEK1,TIMELESS,DTL,BRIP1,BRCA1,BLM,DNA2,EZH2,CCNF,PTTG1,SOX2,FBXO5,KNTC1,CHEK2,MTBP,H2AX,SPDL1,CDK2,TOPBP1,FBXO43,OVOL1,WDR76,SUSD2,PRKDC,FANCD2	52
BP	GO:0044784	metaphase/anaphase transition of cell cycle	22/1183	65/18800	2.76763e-11	2.93138e-09	2.63046e-09	UBE2C,ESPL1,AURKB,TTK,DLGAP5,PRAP1,CDC6,PLK1,NDC80,BUB1,BUB1B,CDT1,TRIP13,ZWINT,CENPF,MAD2L1,CENPE,CCNB1,TACC3,FBXO5,KNTC1,SPDL1	22
BP	GO:0007051	spindle organization	39/1183	188/18800	2.94274e-11	3.05325e-09	2.73982e-09	MYBL2,KIF4A,TPX2,ESPL1,CDC20,AURKB,TTK,KIFC1,NEK2,DLGAP5,PLK1,KIF23,NDC80,AUNIP,NUF2,AURKA,ASPM,SPAG5,CCNB2,PRC1,KIF15,KIF11,CENPE,WDR62,CCNB1,SPC25,RACGAP1,STMN1,PSRC1,STIL,FSD1,TACC3,INCENP,FBXO5,CHEK2,TUBG1,TUBB,CENPH,KNSTRN	39
BP	GO:0030071	regulation of mitotic metaphase/anaphase transition	21/1183	60/18800	3.76293e-11	3.78336e-09	3.39499e-09	UBE2C,ESPL1,AURKB,TTK,DLGAP5,PRAP1,CDC6,PLK1,NDC80,BUB1,BUB1B,CDT1,TRIP13,ZWINT,CENPF,MAD2L1,CENPE,CCNB1,FBXO5,KNTC1,SPDL1	21
BP	GO:1905818	regulation of chromosome separation	23/1183	72/18800	3.79527e-11	3.78336e-09	3.39499e-09	UBE2C,ESPL1,AURKB,TTK,DLGAP5,PRAP1,CDC6,PLK1,NDC80,BUB1,BUB1B,CDT1,TRIP13,ZWINT,CENPF,MAD2L1,CENPE,CCNB1,TACC3,PTTG1,FBXO5,KNTC1,SPDL1	23
BP	GO:0006310	DNA recombination	54/1183	324/18800	4.32487e-11	4.22839e-09	3.79433e-09	CDC45,RAD54L,TOP2A,EXO1,AUNIP,POLQ,TEX15,TRIP13,RECQL4,MCM2,HROB,RAD51AP1,EME1,PIF1,XRCC2,GINS4,TEX19,RAD51,GINS2,CHEK1,KPNA2,MCM4,FANCB,TIMELESS,PARPBP,TONSL,BRIP1,BRCA1,ANKLE1,BLM,MCM8,MCM7,RAG1,FEN1,MCM6,CDC7,PSMC3IP,UNG,DMC1,MEI4,MND1,RMI2,RAD54B,MCM3,ATAD5,H2AX,ACTL6A,HSF2BP,H1-3,CGAS,MCM5,PRKDC,ALYREF,FANCD2	54
BP	GO:0007389	pattern specification process	68/1183	463/18800	4.91422e-11	4.71395e-09	4.23004e-09	HOXB9,HOXC10,SP8,HOXB8,HOXC11,HOXA10,HOXC13,DLL3,HOXC6,HOXC9,HOXC8,FOXD1,HOXA11,SEMA3A,ZIC1,HOXB7,GREM1,TDRD5,AURKA,HOXD13,BARX1,FOXB1,XRCC2,HOXC4,MDFI,FOXG1,HOXA9,HOXD11,STIL,DKK1,SMO,TBR1,HOXD10,RIPPLY3,LRP4,OTX1,ALX3,LHX2,HOXB6,HOXA3,NDRG4,HHIP,HOXA6,PITX2,IRX2,GBX2,FOXH1,SIX2,SIM2,LHX1,IRX1,HOXD9,CDX2,HOXB5,NKX3-2,HOXA7,WT1,FOXA1,SIX3,TBX1,TLL2,GRHL3,TBX18,HOXD8,PRKDC,VAX2,VANGL2,HES6	68
BP	GO:0000727	double-strand break repair via break-induced replication	10/1183	12/18800	5.51508e-11	5.19235e-09	4.65933e-09	CDC45,MCM2,GINS4,GINS2,MCM4,MCM7,MCM6,CDC7,MCM3,MCM5	10
BP	GO:0034508	centromere complex assembly	15/1183	31/18800	1.01704e-10	9.40119e-09	8.43612e-09	CENPA,HJURP,DLGAP5,CENPF,CENPW,CENPI,CENPE,OIP5,HELLS,CENPO,CENPN,KNTC1,CENPK,CENPH,MIS18A	15
BP	GO:0007052	mitotic spindle organization	30/1183	124/18800	1.07775e-10	9.67856e-09	8.68501e-09	MYBL2,KIF4A,TPX2,CDC20,AURKB,TTK,KIFC1,NEK2,DLGAP5,PLK1,KIF23,NDC80,NUF2,AURKA,PRC1,KIF15,KIF11,CENPE,WDR62,CCNB1,SPC25,RACGAP1,STMN1,PSRC1,STIL,FSD1,TACC3,CHEK2,TUBG1,CENPH	30
BP	GO:1902099	regulation of metaphase/anaphase transition of cell cycle	21/1183	63/18800	1.08513e-10	9.67856e-09	8.68501e-09	UBE2C,ESPL1,AURKB,TTK,DLGAP5,PRAP1,CDC6,PLK1,NDC80,BUB1,BUB1B,CDT1,TRIP13,ZWINT,CENPF,MAD2L1,CENPE,CCNB1,FBXO5,KNTC1,SPDL1	21
BP	GO:0009952	anterior/posterior pattern specification	41/1183	214/18800	1.26417e-10	1.10811e-08	9.9436e-09	HOXB9,HOXC10,HOXB8,HOXC11,HOXA10,HOXC13,DLL3,HOXC6,HOXC9,HOXC8,HOXA11,HOXB7,TDRD5,AURKA,HOXD13,BARX1,FOXB1,XRCC2,HOXC4,HOXA9,DKK1,SMO,HOXD10,OTX1,HOXB6,HOXA3,HOXA6,GBX2,FOXH1,SIX2,LHX1,HOXD9,CDX2,HOXB5,HOXA7,WT1,TBX1,TBX18,HOXD8,PRKDC,HES6	41
BP	GO:0045132	meiotic chromosome segregation	26/1183	96/18800	1.29502e-10	1.11592e-08	1.00136e-08	ESPL1,TTK,NCAPH,CCNE1,TOP2A,PLK1,MEIOC,NUF2,BUB1,TEX15,BUB1B,TRIP13,EME1,SGO1,SYCP2,BRIP1,SGO2,P3H4,PTTG1,PSMC3IP,CCNE2,DMC1,MAEL,MEI4,NDC1,FANCD2	26
BP	GO:0010389	regulation of G2/M transition of mitotic cell cycle	26/1183	97/18800	1.66463e-10	1.38738e-08	1.24496e-08	HMGA2,AURKB,TICRR,CDC6,PLK1,CLSPN,CDC25C,KIF14,ORC1,AURKA,CENPF,CDC25A,CCNB1,CDK1,KCNH5,CHEK1,DTL,BRCA1,BLM,CDC7,FBXO5,DBF4B,CDK2,HSPA2,TOPBP1,CDK4	26
BP	GO:0051304	chromosome separation	26/1183	97/18800	1.66463e-10	1.38738e-08	1.24496e-08	UBE2C,ESPL1,AURKB,TTK,NCAPH,TOP2A,DLGAP5,PRAP1,CDC6,PLK1,NDC80,BUB1,BUB1B,CDT1,TRIP13,ZWINT,CENPF,EME1,MAD2L1,CENPE,CCNB1,TACC3,PTTG1,FBXO5,KNTC1,SPDL1	26
BP	GO:0008608	attachment of spindle microtubules to kinetochore	16/1183	37/18800	1.9999e-10	1.63992e-08	1.47157e-08	KIF2C,AURKB,NEK2,NDC80,NUF2,CDT1,SPAG5,SGO1,CENPE,CCNB1,SPC25,RACGAP1,KNL1,ECT2,SPC24,KNSTRN	16
BP	GO:0045786	negative regulation of cell cycle	59/1183	387/18800	2.17361e-10	1.75407e-08	1.574e-08	HMGA2,ESPL1,AURKB,TTK,CDC45,NEK2,TICRR,PRAP1,CDC6,PLK1,MEIOC,CLSPN,NDC80,GTSE1,BUB1,BUB1B,ORC1,E2F7,CDT1,TRIP13,NUPR2,ZWINT,CENPF,E2F1,EME1,MAD2L1,CCNB1,CDK1,E2F8,CHEK1,TIMELESS,DTL,BRIP1,BRCA1,BLM,DNA2,EZH2,CDKN2A,CCNF,PTTG1,SOX2,FBXO5,KNTC1,CHEK2,MTBP,SUV39H1,H2AX,SPDL1,CDK2,GMNN,TOPBP1,FBXO43,SCRIB,INHA,OVOL1,WDR76,SUSD2,PRKDC,FANCD2	59
BP	GO:1900262	regulation of DNA-directed DNA polymerase activity	10/1183	13/18800	2.25436e-10	1.76326e-08	1.58225e-08	GINS1,GINS4,DSCC1,GINS2,RFC4,CHTF18,GINS3,PCNA,RFC5,RFC3	10
BP	GO:1900264	positive regulation of DNA-directed DNA polymerase activity	10/1183	13/18800	2.25436e-10	1.76326e-08	1.58225e-08	GINS1,GINS4,DSCC1,GINS2,RFC4,CHTF18,GINS3,PCNA,RFC5,RFC3	10
BP	GO:0045839	negative regulation of mitotic nuclear division	18/1183	48/18800	2.52592e-10	1.94573e-08	1.74599e-08	AURKB,TTK,PRAP1,PLK1,NDC80,BUB1,BUB1B,CDT1,TRIP13,ZWINT,CENPF,MAD2L1,CCNB1,CHEK1,FBXO5,KNTC1,MTBP,SPDL1	18
BP	GO:0070192	chromosome organization involved in meiotic cell cycle	22/1183	72/18800	2.66841e-10	2.0248e-08	1.81695e-08	NCAPH,CCNE1,MEIOC,BUB1,TEX15,BUB1B,TRIP13,SGO1,RAD51,SYCP2,BRIP1,NCAPD2,SGO2,P3H4,PSMC3IP,CCNE2,DMC1,MAEL,MEI4,NDC1,FANCD2,NCAPD3	22
BP	GO:1901988	negative regulation of cell cycle phase transition	45/1183	255/18800	2.72109e-10	2.03442e-08	1.82558e-08	HMGA2,AURKB,TTK,CDC45,TICRR,PRAP1,CDC6,PLK1,CLSPN,NDC80,GTSE1,BUB1,BUB1B,ORC1,E2F7,CDT1,TRIP13,ZWINT,CENPF,E2F1,EME1,MAD2L1,CCNB1,CDK1,CHEK1,TIMELESS,DTL,BRIP1,BRCA1,BLM,DNA2,EZH2,SOX2,FBXO5,KNTC1,CHEK2,H2AX,SPDL1,CDK2,TOPBP1,OVOL1,WDR76,SUSD2,PRKDC,FANCD2	45
BP	GO:0033046	negative regulation of sister chromatid segregation	17/1183	43/18800	2.99656e-10	2.14571e-08	1.92544e-08	AURKB,TTK,PRAP1,PLK1,NDC80,BUB1,BUB1B,CDT1,TRIP13,ZWINT,CENPF,MAD2L1,CCNB1,PTTG1,FBXO5,KNTC1,SPDL1	17
BP	GO:0033048	negative regulation of mitotic sister chromatid segregation	17/1183	43/18800	2.99656e-10	2.14571e-08	1.92544e-08	AURKB,TTK,PRAP1,PLK1,NDC80,BUB1,BUB1B,CDT1,TRIP13,ZWINT,CENPF,MAD2L1,CCNB1,PTTG1,FBXO5,KNTC1,SPDL1	17
BP	GO:2000816	negative regulation of mitotic sister chromatid separation	17/1183	43/18800	2.99656e-10	2.14571e-08	1.92544e-08	AURKB,TTK,PRAP1,PLK1,NDC80,BUB1,BUB1B,CDT1,TRIP13,ZWINT,CENPF,MAD2L1,CCNB1,PTTG1,FBXO5,KNTC1,SPDL1	17
BP	GO:1902749	regulation of cell cycle G2/M phase transition	27/1183	108/18800	4.15557e-10	2.90224e-08	2.60431e-08	HMGA2,AURKB,TICRR,CDC6,PLK1,CLSPN,CDC25C,KIF14,ORC1,AURKA,CENPF,CDC25A,CCNB1,CDK1,KCNH5,CHEK1,DTL,BRCA1,BLM,CDC7,FBXO5,DBF4B,ATAD5,CDK2,HSPA2,TOPBP1,CDK4	27
BP	GO:0051784	negative regulation of nuclear division	19/1183	55/18800	4.16726e-10	2.90224e-08	2.60431e-08	AURKB,TTK,PRAP1,PLK1,NDC80,BUB1,BUB1B,CDT1,TRIP13,ZWINT,CENPF,MAD2L1,CCNB1,CHEK1,FBXO5,KNTC1,MTBP,SPDL1,FBXO43	19
BP	GO:0009954	proximal/distal pattern formation	15/1183	34/18800	5.24857e-10	3.60591e-08	3.23575e-08	HOXB9,HOXC10,SP8,HOXC11,HOXA10,HOXC9,HOXA11,GREM1,HOXA9,HOXD10,LRP4,IRX2,IRX1,HOXD9,SIX3	15
BP	GO:0000725	recombinational repair	34/1183	164/18800	5.5104e-10	3.73532e-08	3.35187e-08	CDC45,RAD54L,AUNIP,POLQ,TEX15,RECQL4,MCM2,HROB,RAD51AP1,XRCC2,GINS4,RAD51,GINS2,CHEK1,MCM4,FANCB,TIMELESS,PARPBP,TONSL,BRCA1,BLM,MCM8,MCM7,FEN1,MCM6,CDC7,DMC1,RMI2,RAD54B,MCM3,H2AX,ACTL6A,CGAS,MCM5	34
BP	GO:0051985	negative regulation of chromosome segregation	17/1183	45/18800	6.9585e-10	4.59442e-08	4.12278e-08	AURKB,TTK,PRAP1,PLK1,NDC80,BUB1,BUB1B,CDT1,TRIP13,ZWINT,CENPF,MAD2L1,CCNB1,PTTG1,FBXO5,KNTC1,SPDL1	17
BP	GO:1905819	negative regulation of chromosome separation	17/1183	45/18800	6.9585e-10	4.59442e-08	4.12278e-08	AURKB,TTK,PRAP1,PLK1,NDC80,BUB1,BUB1B,CDT1,TRIP13,ZWINT,CENPF,MAD2L1,CCNB1,PTTG1,FBXO5,KNTC1,SPDL1	17
BP	GO:0045841	negative regulation of mitotic metaphase/anaphase transition	16/1183	40/18800	8.15409e-10	5.31479e-08	4.76921e-08	AURKB,TTK,PRAP1,PLK1,NDC80,BUB1,BUB1B,CDT1,TRIP13,ZWINT,CENPF,MAD2L1,CCNB1,FBXO5,KNTC1,SPDL1	16
BP	GO:0033047	regulation of mitotic sister chromatid segregation	17/1183	46/18800	1.03934e-09	6.68861e-08	6.00199e-08	AURKB,TTK,PRAP1,PLK1,NDC80,BUB1,BUB1B,CDT1,TRIP13,ZWINT,CENPF,MAD2L1,CCNB1,PTTG1,FBXO5,KNTC1,SPDL1	17
BP	GO:0000724	double-strand break repair via homologous recombination	33/1183	162/18800	1.58462e-09	1.00702e-07	9.03648e-08	CDC45,RAD54L,AUNIP,POLQ,TEX15,RECQL4,MCM2,RAD51AP1,XRCC2,GINS4,RAD51,GINS2,CHEK1,MCM4,FANCB,TIMELESS,PARPBP,TONSL,BRCA1,BLM,MCM8,MCM7,FEN1,MCM6,CDC7,DMC1,RMI2,RAD54B,MCM3,H2AX,ACTL6A,CGAS,MCM5	33
BP	GO:1902100	negative regulation of metaphase/anaphase transition of cell cycle	16/1183	42/18800	1.91603e-09	1.20261e-07	1.07915e-07	AURKB,TTK,PRAP1,PLK1,NDC80,BUB1,BUB1B,CDT1,TRIP13,ZWINT,CENPF,MAD2L1,CCNB1,FBXO5,KNTC1,SPDL1	16
BP	GO:0006275	regulation of DNA replication	29/1183	131/18800	2.05959e-09	1.27695e-07	1.14586e-07	TICRR,CDC6,E2F7,CDT1,CCNA2,GINS1,CDK1,GINS4,DSCC1,GINS2,E2F8,TIMELESS,RFC4,ESCO2,BLM,DNA2,CDC7,FBXO5,DBF4B,CHTF18,GINS3,ATAD5,PCNA,RFC5,CDK2,GMNN,ACTL6A,DBF4,RFC3	29
BP	GO:0051383	kinetochore organization	12/1183	23/18800	2.57953e-09	1.58004e-07	1.41784e-07	CENPA,DLGAP5,NDC80,NUF2,CDT1,CENPF,CENPW,CENPE,CENPN,KNTC1,CENPK,CENPH	12
BP	GO:0007094	mitotic spindle assembly checkpoint signaling	15/1183	38/18800	3.44449e-09	2.03626e-07	1.82723e-07	AURKB,TTK,PRAP1,PLK1,NDC80,BUB1,BUB1B,CDT1,TRIP13,ZWINT,CENPF,MAD2L1,CCNB1,KNTC1,SPDL1	15
BP	GO:0071173	spindle assembly checkpoint signaling	15/1183	38/18800	3.44449e-09	2.03626e-07	1.82723e-07	AURKB,TTK,PRAP1,PLK1,NDC80,BUB1,BUB1B,CDT1,TRIP13,ZWINT,CENPF,MAD2L1,CCNB1,KNTC1,SPDL1	15
BP	GO:0071174	mitotic spindle checkpoint signaling	15/1183	38/18800	3.44449e-09	2.03626e-07	1.82723e-07	AURKB,TTK,PRAP1,PLK1,NDC80,BUB1,BUB1B,CDT1,TRIP13,ZWINT,CENPF,MAD2L1,CCNB1,KNTC1,SPDL1	15
BP	GO:0065004	protein-DNA complex assembly	37/1183	203/18800	4.21852e-09	2.44564e-07	2.19458e-07	CENPA,HJURP,CDC45,DLGAP5,CDT1,MCM2,CENPF,CENPW,CENPI,CENPE,OIP5,RAD51,ASF1B,H2BC11,H2BC8,HELLS,TSPYL5,TAF7L,CENPO,H2BC9,CENPN,KNTC1,CENPK,DMC1,H3C8,CHAF1B,H2BC17,H3C4,CHAF1A,H2AX,GMNN,H3C6,CENPH,H2BC7,H1-3,MIS18A,H2BU1	37
BP	GO:0033044	regulation of chromosome organization	38/1183	212/18800	4.23321e-09	2.44564e-07	2.19458e-07	UBE2C,ESPL1,AURKB,TTK,NCAPH,NEK2,TOP2A,DLGAP5,PRAP1,CDC6,PLK1,CDCA5,NDC80,NCAPG,BUB1,BUB1B,CDT1,TRIP13,MCM2,ZWINT,CENPF,MAD2L1,CENPE,CCNB1,PIF1,TACC3,NCAPD2,FEN1,PTTG1,FBXO5,KNTC1,DDX11,RMI2,SPDL1,CDK2,ACTL6A,CCT5,CCT6A	38
BP	GO:0031577	spindle checkpoint signaling	15/1183	39/18800	5.27262e-09	3.01191e-07	2.70272e-07	AURKB,TTK,PRAP1,PLK1,NDC80,BUB1,BUB1B,CDT1,TRIP13,ZWINT,CENPF,MAD2L1,CCNB1,KNTC1,SPDL1	15
BP	GO:0031570	DNA integrity checkpoint signaling	27/1183	123/18800	8.92803e-09	4.98793e-07	4.47589e-07	HMGA2,CDC45,TICRR,PRAP1,CDC6,PLK1,CLSPN,GTSE1,ORC1,CDT1,E2F1,EME1,CDK1,CHEK1,TIMELESS,DTL,BRIP1,BRCA1,BLM,DNA2,CHEK2,H2AX,CDK2,TOPBP1,WDR76,PRKDC,FANCD2	27
BP	GO:1901989	positive regulation of cell cycle phase transition	27/1183	123/18800	8.92803e-09	4.98793e-07	4.47589e-07	UBE2C,ESPL1,DLGAP5,FAM83D,PRAP1,CDC6,CDCA5,RRM2,CDC25C,CDT1,CDC25A,CCNB1,CDK1,TERT,DTL,STIL,EZH2,CDC7,FBXO5,DBF4B,CHEK2,MTBP,PLCB1,ATAD5,HSPA2,CDK4,SASS6	27
BP	GO:0045143	homologous chromosome segregation	19/1183	65/18800	1.0007e-08	5.4705e-07	4.90893e-07	ESPL1,CCNE1,PLK1,MEIOC,TEX15,TRIP13,SGO1,SYCP2,BRIP1,SGO2,P3H4,PTTG1,PSMC3IP,CCNE2,DMC1,MAEL,MEI4,NDC1,FANCD2	19
BP	GO:0051310	metaphase plate congression	19/1183	65/18800	1.0007e-08	5.4705e-07	4.90893e-07	KIF2C,AURKB,KIFC1,FAM83D,CDCA5,MEIOC,NDC80,NUF2,CDCA8,KIF14,CDT1,SPAG5,CENPF,CENPE,CCNB1,PSRC1,INCENP,KIF18A,SPDL1	19
BP	GO:0045930	negative regulation of mitotic cell cycle	39/1183	234/18800	2.17063e-08	1.17399e-06	1.05347e-06	HMGA2,AURKB,TTK,TICRR,PRAP1,CDC6,PLK1,MEIOC,CLSPN,NDC80,GTSE1,BUB1,BUB1B,ORC1,E2F7,CDT1,TRIP13,ZWINT,CENPF,EME1,MAD2L1,CCNB1,CDK1,CHEK1,DTL,BRCA1,BLM,EZH2,FBXO5,KNTC1,CHEK2,MTBP,SPDL1,CDK2,TOPBP1,SCRIB,OVOL1,PRKDC,FANCD2	39
BP	GO:0051052	regulation of DNA metabolic process	62/1183	472/18800	2.85432e-08	1.52751e-06	1.3707e-06	HMGA2,FOXM1,AURKB,NEK2,TICRR,CDC6,AUNIP,POLQ,TEX15,GREM1,E2F7,CDT1,CCNA2,GINS1,RAD51AP1,PIF1,CDK1,GINS4,RAD51,DSCC1,GINS2,E2F8,CHEK1,KPNA2,FANCB,TIMELESS,EYA2,PARPBP,RFC4,BRCA1,ESCO2,ANKLE1,BLM,DNA2,TWIST1,CDC7,FBXO5,DBF4B,CHTF18,DDX11,PRKCG,GINS3,RMI2,ATAD5,PCNA,RFC5,H2AX,CDK2,GMNN,WT1,ACTL6A,CCT5,DBF4,RFC3,OTUB2,H1-3,CGAS,CERS1,PRKDC,ALYREF,MIS18A,CCT6A	62
BP	GO:0071824	protein-DNA complex subunit organization	39/1183	237/18800	3.10554e-08	1.64464e-06	1.47581e-06	CENPA,HJURP,CDC45,DLGAP5,HMGA1,CDT1,MCM2,CENPF,CENPW,CENPI,CENPE,OIP5,RAD51,ASF1B,H2BC11,H2BC8,HELLS,TSPYL5,TAF7L,CENPO,H2BC9,H2AW,CENPN,KNTC1,CENPK,DMC1,H3C8,CHAF1B,H2BC17,H3C4,CHAF1A,H2AX,GMNN,H3C6,CENPH,H2BC7,H1-3,MIS18A,H2BU1	39
BP	GO:1901991	negative regulation of mitotic cell cycle phase transition	33/1183	183/18800	3.76354e-08	1.97256e-06	1.77007e-06	HMGA2,AURKB,TTK,TICRR,PRAP1,CDC6,PLK1,CLSPN,NDC80,GTSE1,BUB1,BUB1B,ORC1,E2F7,CDT1,TRIP13,ZWINT,CENPF,MAD2L1,CCNB1,CDK1,CHEK1,DTL,BRCA1,BLM,EZH2,FBXO5,KNTC1,CHEK2,SPDL1,CDK2,TOPBP1,PRKDC	33
BP	GO:1901992	positive regulation of mitotic cell cycle phase transition	23/1183	100/18800	4.42623e-08	2.29622e-06	2.0605e-06	UBE2C,ESPL1,DLGAP5,PRAP1,CDC6,CDCA5,RRM2,CDC25C,CDT1,CDC25A,CCNB1,CDK1,TERT,DTL,STIL,CDC7,FBXO5,DBF4B,MTBP,PLCB1,HSPA2,CDK4,SASS6	23
BP	GO:0034501	protein localization to kinetochore	10/1183	19/18800	5.13314e-08	2.60969e-06	2.34179e-06	AURKB,TTK,NDC80,CDT1,CDK1,HASPIN,KNL1,KNTC1,MTBP,SPDL1	10
BP	GO:1903083	protein localization to condensed chromosome	10/1183	19/18800	5.13314e-08	2.60969e-06	2.34179e-06	AURKB,TTK,NDC80,CDT1,CDK1,HASPIN,KNL1,KNTC1,MTBP,SPDL1	10
BP	GO:0006271	DNA strand elongation involved in DNA replication	9/1183	15/18800	5.31921e-08	2.67751e-06	2.40265e-06	GINS1,MCM4,RFC4,DNA2,MCM7,POLE,MCM3,PCNA,RFC3	9
BP	GO:0045931	positive regulation of mitotic cell cycle	26/1183	128/18800	8.94225e-08	4.4571e-06	3.99956e-06	UBE2C,ESPL1,DLGAP5,PRAP1,CDC6,CDCA5,RRM2,CDC25C,CDT1,CDC25A,CCNB1,CDK1,TERT,DTL,STIL,SPHK1,EIF4EBP1,CDC7,FBXO5,DBF4B,MTBP,PLCB1,HSPA2,FOXA1,CDK4,SASS6	26
BP	GO:0051303	establishment of chromosome localization	20/1183	81/18800	9.49199e-08	4.68517e-06	4.20422e-06	KIF2C,AURKB,KIFC1,DLGAP5,FAM83D,CDCA5,MEIOC,NDC80,NUF2,CDCA8,KIF14,CDT1,SPAG5,CENPF,CENPE,CCNB1,PSRC1,INCENP,KIF18A,SPDL1	20
BP	GO:2001251	negative regulation of chromosome organization	21/1183	89/18800	1.06068e-07	5.18507e-06	4.6528e-06	ESPL1,AURKB,TTK,TOP2A,PRAP1,PLK1,NDC80,BUB1,BUB1B,CDT1,TRIP13,MCM2,ZWINT,CENPF,MAD2L1,CCNB1,PIF1,PTTG1,FBXO5,KNTC1,SPDL1	21
BP	GO:0071459	protein localization to chromosome, centromeric region	11/1183	25/18800	1.14853e-07	5.56105e-06	4.99018e-06	CENPA,AURKB,TTK,NDC80,CDT1,CDK1,HASPIN,KNL1,KNTC1,MTBP,SPDL1	11
BP	GO:0050000	chromosome localization	20/1183	83/18800	1.46593e-07	7.03094e-06	6.30919e-06	KIF2C,AURKB,KIFC1,DLGAP5,FAM83D,CDCA5,MEIOC,NDC80,NUF2,CDCA8,KIF14,CDT1,SPAG5,CENPF,CENPE,CCNB1,PSRC1,INCENP,KIF18A,SPDL1	20
BP	GO:0140694	non-membrane-bounded organelle assembly	51/1183	379/18800	2.2856e-07	1.08376e-05	9.72511e-06	VIL1,MYBL2,KIF4A,CENPA,TPX2,TNNT1,CDC20,AURKB,KIFC1,NEK2,DLGAP5,PLK1,KIF23,NDC80,ANLN,AURKA,ASPM,SPAG5,CCNB2,CENPF,CENPW,PRC1,KIF15,KIF11,CENPE,WDR62,RACGAP1,NEB,PLK4,STIL,BRCA1,INCENP,PRKAA2,FBXO5,CENPN,KNTC1,CENPK,FLNC,CHEK2,FSCN1,VCX,SQLE,TUBB,DHX37,BOP1,CDK2,MYH6,CENPH,FHOD3,PRKDC,SASS6	51
BP	GO:0000076	DNA replication checkpoint signaling	9/1183	17/18800	2.30225e-07	1.08376e-05	9.72511e-06	CDC45,TICRR,CDC6,CLSPN,ORC1,CDT1,TIMELESS,DNA2,TOPBP1	9
BP	GO:0048705	skeletal system morphogenesis	36/1183	228/18800	2.99755e-07	1.39812e-05	1.2546e-05	HOXB9,HOXB8,HOXC11,HOXC9,HOXC8,COL11A1,SHOX2,ALX1,HOXA11,COL2A1,HOXA1,HOXB7,GREM1,HOXC4,MDFI,HOXA9,HOXD10,ALX3,HOXB6,HOXA3,TWIST1,HHIP,HOXA6,DLX5,SIX2,LHX1,HOXD9,HOXB5,NKX3-2,HOXA7,MMP14,TBX1,RFLNA,OSR2,HOXD8,COL1A1	36
BP	GO:0007143	female meiotic nuclear division	12/1183	33/18800	3.75482e-07	1.73541e-05	1.55726e-05	TTK,NCAPH,TOP2A,PLK1,MEIOC,NDC80,AURKA,TRIP13,CCNB2,SYCP2,FBXO5,HSF2BP	12
BP	GO:0051382	kinetochore assembly	9/1183	18/18800	4.34678e-07	1.99091e-05	1.78653e-05	CENPA,DLGAP5,CENPF,CENPW,CENPE,CENPN,KNTC1,CENPK,CENPH	9
BP	GO:1902969	mitotic DNA replication	8/1183	14/18800	5.12598e-07	2.32683e-05	2.08797e-05	CDC45,GINS1,MCM2,RAD51,MCM4,MCM6,GINS3,MCM3	8
BP	GO:0048608	reproductive structure development	55/1183	433/18800	5.19122e-07	2.33559e-05	2.09583e-05	HOXB13,HOXA10,HOXA11,SEMA3A,SERPINB5,HOXA13,PTPRN,E2F7,ASPM,HOXD13,ZFY,GJB3,TEX19,E2F8,MDFI,SYCP2,PRLR,STC2,GREB1L,PLK4,BRIP1,PLAC1,STRA6,LEP,ADM,KIF18A,CCNF,NR5A1,FANCA,GJB2,DMC1,VGF,SULF1,SOX15,LHX1,PLAG1,BIK,CDX2,FOSL1,NUDT1,FANCG,DHX37,WT1,FOXA1,MMP14,ADA,INHA,COL9A3,ASCL2,FKBP4,ETNK2,PLCD3,ST14,IGF2,CYP19A1	55
BP	GO:0007292	female gamete generation	28/1183	158/18800	5.7628e-07	2.57001e-05	2.30618e-05	YBX2,TTK,NCAPH,TOP2A,PLK1,MEIOC,NDC80,TDRD5,BCL2L10,AURKA,ASPM,TRIP13,CCNB2,HROB,ZFY,SYCP2,SOHLH1,LEP,STRA8,MCM8,FBXO5,SOHLH2,DMC1,MEI4,FOSL1,PIWIL2,MDK,HSF2BP	28
BP	GO:0042471	ear morphogenesis	24/1183	123/18800	6.03303e-07	2.66712e-05	2.39333e-05	DLX6,COL11A1,COL2A1,ZIC1,HOXA1,CHRNA9,USH1C,FOXG1,CTHRC1,OTX1,USH1G,TWIST1,GJB6,DLX5,GBX2,SIX2,LHFPL5,EPHB2,NKX3-2,TBX1,SCRIB,GRHL3,OSR2,TBX18	24
BP	GO:0061458	reproductive system development	55/1183	436/18800	6.47825e-07	2.83926e-05	2.5478e-05	HOXB13,HOXA10,HOXA11,SEMA3A,SERPINB5,HOXA13,PTPRN,E2F7,ASPM,HOXD13,ZFY,GJB3,TEX19,E2F8,MDFI,SYCP2,PRLR,STC2,GREB1L,PLK4,BRIP1,PLAC1,STRA6,LEP,ADM,KIF18A,CCNF,NR5A1,FANCA,GJB2,DMC1,VGF,SULF1,SOX15,LHX1,PLAG1,BIK,CDX2,FOSL1,NUDT1,FANCG,DHX37,WT1,FOXA1,MMP14,ADA,INHA,COL9A3,ASCL2,FKBP4,ETNK2,PLCD3,ST14,IGF2,CYP19A1	55
BP	GO:0044774	mitotic DNA integrity checkpoint signaling	19/1183	85/18800	1.03618e-06	4.50251e-05	4.04031e-05	HMGA2,TICRR,PRAP1,CDC6,PLK1,CLSPN,GTSE1,ORC1,EME1,CDK1,CHEK1,DTL,BRCA1,BLM,CHEK2,CDK2,TOPBP1,PRKDC,FANCD2	19
BP	GO:0051054	positive regulation of DNA metabolic process	38/1183	263/18800	1.38633e-06	5.97298e-05	5.35982e-05	FOXM1,AURKB,NEK2,GREM1,E2F7,CDT1,GINS1,RAD51AP1,CDK1,GINS4,RAD51,DSCC1,GINS2,E2F8,FANCB,TIMELESS,EYA2,RFC4,BRCA1,DNA2,CDC7,DBF4B,CHTF18,DDX11,PRKCG,GINS3,ATAD5,PCNA,RFC5,H2AX,CDK2,WT1,ACTL6A,CCT5,DBF4,RFC3,PRKDC,CCT6A	38
BP	GO:1902751	positive regulation of cell cycle G2/M phase transition	11/1183	31/18800	1.53613e-06	6.56276e-05	5.88907e-05	CDC25C,CDC25A,CCNB1,CDK1,DTL,CDC7,FBXO5,DBF4B,ATAD5,HSPA2,CDK4	11
BP	GO:0007080	mitotic metaphase plate congression	14/1183	51/18800	2.02599e-06	8.44275e-05	7.57607e-05	KIF2C,AURKB,KIFC1,CDCA5,NDC80,NUF2,CDCA8,KIF14,CDT1,CENPE,CCNB1,PSRC1,KIF18A,SPDL1	14
BP	GO:0007140	male meiotic nuclear division	14/1183	51/18800	2.02599e-06	8.44275e-05	7.57607e-05	MEIOC,DMRTC2,TEX15,TRIP13,TDRD12,TEX19,SYCP2,BRDT,KIF18A,FANCA,DMC1,MAEL,HSPA2,HSF2BP	14
BP	GO:0051445	regulation of meiotic cell cycle	14/1183	51/18800	2.02599e-06	8.44275e-05	7.57607e-05	CDC20,TTK,MEIOC,CDC25C,ASPM,TRIP13,RAD51AP1,CDC25A,STRA8,FBXO5,PLCB1,PIWIL2,FBXO43,OVOL1	14
BP	GO:0048732	gland development	53/1183	431/18800	2.24435e-06	9.27663e-05	8.32435e-05	HOXB9,HOXB13,HOXA10,HOXA11,SEMA3A,SERPINB5,HOXA13,AURKA,E2F7,HOXD13,CCNB2,IQGAP3,CPS1,HNF1A,FOXB1,PCSK1,E2F8,PDX1,NEURL1,FGL1,PRLR,TYMS,SMO,STRA6,HNF4A,CGA,FOXE1,EZH2,HOXA3,RAG1,NR5A1,NKX2-3,SOX2,PITX2,SULF1,PLAG1,LAMA5,HOXD9,PCNA,CLCN2,LAMA1,MDK,WT1,FOXA1,SIX3,ADA,TBX1,SCRIB,FKBP4,TNFSF11,IGF2,PITX1,CYP19A1	53
BP	GO:0006563	L-serine metabolic process	7/1183	12/18800	2.29731e-06	9.41898e-05	8.45208e-05	PHGDH,PSPHP1,PSAT1,CBS,SHMT2,PSPH,SDS	7
BP	GO:0007129	homologous chromosome pairing at meiosis	14/1183	53/18800	3.3468e-06	0.000136121	0.000122148	CCNE1,MEIOC,TEX15,TRIP13,SYCP2,BRIP1,P3H4,PSMC3IP,CCNE2,DMC1,MAEL,MEI4,NDC1,FANCD2	14
BP	GO:0010971	positive regulation of G2/M transition of mitotic cell cycle	10/1183	28/18800	4.32469e-06	0.000173349	0.000155554	CDC25C,CDC25A,CCNB1,CDK1,DTL,CDC7,FBXO5,DBF4B,HSPA2,CDK4	10
BP	GO:0034502	protein localization to chromosome	19/1183	93/18800	4.33033e-06	0.000173349	0.000155554	CENPA,AURKB,TTK,PLK1,CDCA5,NDC80,CDT1,CDK1,TERT,HASPIN,KNL1,ESCO2,EZH2,MCM8,KNTC1,MTBP,SPDL1,CCT5,CCT6A	19
BP	GO:0030326	embryonic limb morphogenesis	22/1183	119/18800	4.46671e-06	0.000176037	0.000157966	HOXC10,SP8,HOXC11,HOXA10,DLX6,SHOX2,HOXA11,HOXA13,GREM1,HOXD13,DKK1,HOXD10,LRP4,ALX3,SP9,TWIST1,DLX5,SALL4,CRABP2,HOXD9,OSR2,PITX1	22
BP	GO:0035113	embryonic appendage morphogenesis	22/1183	119/18800	4.46671e-06	0.000176037	0.000157966	HOXC10,SP8,HOXC11,HOXA10,DLX6,SHOX2,HOXA11,HOXA13,GREM1,HOXD13,DKK1,HOXD10,LRP4,ALX3,SP9,TWIST1,DLX5,SALL4,CRABP2,HOXD9,OSR2,PITX1	22
BP	GO:0007144	female meiosis I	7/1183	13/18800	4.70619e-06	0.000182643	0.000163894	MEIOC,NDC80,AURKA,TRIP13,CCNB2,FBXO5,HSF2BP	7
BP	GO:0051988	regulation of attachment of spindle microtubules to kinetochore	7/1183	13/18800	4.70619e-06	0.000182643	0.000163894	AURKB,NEK2,SPAG5,CCNB1,RACGAP1,ECT2,KNSTRN	7
BP	GO:0051225	spindle assembly	22/1183	121/18800	5.92518e-06	0.000228209	0.000204782	MYBL2,KIF4A,TPX2,CDC20,AURKB,KIFC1,NEK2,PLK1,KIF23,NDC80,AURKA,ASPM,SPAG5,CCNB2,PRC1,KIF15,KIF11,RACGAP1,INCENP,FBXO5,CHEK2,TUBB	22
BP	GO:0007062	sister chromatid cohesion	15/1183	63/18800	6.13236e-06	0.000234413	0.000210349	ESPL1,SMC1B,CDC20,PLK1,CDCA5,BUB1,BUB1B,SGO1,DSCC1,HASPIN,ESCO2,DDX12P,SGO2,FEN1,DDX11	15
BP	GO:0007131	reciprocal meiotic recombination	14/1183	57/18800	8.45492e-06	0.000318406	0.00028572	RAD54L,TOP2A,TRIP13,RAD51AP1,EME1,TEX19,RAD51,BRIP1,PSMC3IP,DMC1,MND1,RAD54B,HSF2BP,FANCD2	14
BP	GO:0140527	reciprocal homologous recombination	14/1183	57/18800	8.45492e-06	0.000318406	0.00028572	RAD54L,TOP2A,TRIP13,RAD51AP1,EME1,TEX19,RAD51,BRIP1,PSMC3IP,DMC1,MND1,RAD54B,HSF2BP,FANCD2	14
BP	GO:2000105	positive regulation of DNA-templated DNA replication	7/1183	14/18800	8.89977e-06	0.000331541	0.000297507	E2F7,CDT1,E2F8,CDC7,DBF4B,CDK2,DBF4	7
BP	GO:0000077	DNA damage checkpoint signaling	21/1183	115/18800	8.93461e-06	0.000331541	0.000297507	HMGA2,TICRR,PRAP1,PLK1,CLSPN,GTSE1,E2F1,EME1,CDK1,CHEK1,DTL,BRIP1,BRCA1,BLM,CHEK2,H2AX,CDK2,TOPBP1,WDR76,PRKDC,FANCD2	21
BP	GO:0022412	cellular process involved in reproduction in multicellular organism	49/1183	406/18800	8.99934e-06	0.000331541	0.000297507	YBX2,PAEP,TTK,NCAPH,TOP2A,PLK1,MEIOC,NDC80,DMRTC2,TEX15,TDRD5,AURKA,ASPM,TRIP13,CCNB2,TDRD12,ADAM2,ZFY,KLC3,TEX19,SYCP2,NEURL1,CABYR,BRIP1,KNL1,SOHLH1,BRDT,SEPTIN14,STRA8,KIF18A,FBXO5,FANCA,SOHLH2,DMC1,SERPINA5,MAEL,MEI4,FOSL1,FANCG,PIWIL2,MDK,HSPA2,WT1,HSF2BP,DNMT3A,LIN28A,SOX30,DEFB1,DPY19L2	49
BP	GO:0044773	mitotic DNA damage checkpoint signaling	17/1183	81/18800	9.37016e-06	0.000342719	0.000307537	HMGA2,TICRR,PRAP1,PLK1,CLSPN,GTSE1,EME1,CDK1,CHEK1,DTL,BRCA1,BLM,CHEK2,CDK2,TOPBP1,PRKDC,FANCD2	17
BP	GO:0061351	neural precursor cell proliferation	24/1183	143/18800	9.55332e-06	0.000346922	0.000311309	IGF2BP1,MELK,KIF14,ASPM,WDR62,LHX5,RACGAP1,SLC39A5,FOXG1,ARTN,SHCBP1,SMO,TRNP1,LHX2,CDH2,HHIP,GPR37L1,VAX1,GBX2,LHX1,DBN1,MDK,SIX3,FZD9	24
BP	GO:0022616	DNA strand elongation	11/1183	37/18800	1.0932e-05	0.000394173	0.000353709	GINS1,TERT,MCM4,RFC4,DNA2,MCM7,POLE,MCM3,PCNA,ACTL6A,RFC3	11
BP	GO:0090596	sensory organ morphogenesis	36/1183	266/18800	1.17204e-05	0.000419623	0.000376547	GNGT1,HOXC13,DLX6,COL11A1,COL2A1,ZIC1,HOXA1,CHRNA9,USH1C,FOXG1,CTHRC1,STRA6,OTX1,USH1G,TWIST1,GJB6,TULP1,DLX5,MFAP5,PITX2,GBX2,SIX2,LHFPL5,LHX1,EPHB2,MFAP2,NKX3-2,SIX3,TBX1,SCRIB,TH,GRHL3,OSR2,TBX18,WNT16,VAX2	36
BP	GO:0042770	signal transduction in response to DNA damage	27/1183	174/18800	1.22178e-05	0.000434371	0.000389781	HMGA2,FOXM1,TICRR,PRAP1,PLK1,CLSPN,GTSE1,E2F7,E2F1,EME1,CDK1,CHEK1,DTL,BRIP1,BRCA1,BLM,TWIST1,CHEK2,ATAD5,PMAIP1,H2AX,CDK2,TOPBP1,MIF,WDR76,PRKDC,FANCD2	27
BP	GO:0071897	DNA biosynthetic process	29/1183	194/18800	1.23552e-05	0.000436209	0.00039143	AURKB,NEK2,POLQ,GREM1,GINS1,HROB,CENPF,PIF1,GINS4,TK1,DSCC1,GINS2,TERT,CHEK1,TYMS,DTL,RFC4,PCLAF,POLE2,SPHK1,CHTF18,GINS3,POLE,PCNA,RFC5,CCT5,RFC3,CERS1,CCT6A	29
BP	GO:0035825	homologous recombination	14/1183	59/18800	1.29833e-05	0.000455223	0.000408492	RAD54L,TOP2A,TRIP13,RAD51AP1,EME1,TEX19,RAD51,BRIP1,PSMC3IP,DMC1,MND1,RAD54B,HSF2BP,FANCD2	14
BP	GO:0016572	histone phosphorylation	12/1183	45/18800	1.50504e-05	0.000522795	0.000469128	HMGA2,AURKB,AURKA,CCNA2,CDK1,CHEK1,HASPIN,INCENP,PRKAA2,TWIST1,CDK2,VRK1	12
BP	GO:2000241	regulation of reproductive process	27/1183	176/18800	1.51162e-05	0.000522795	0.000469128	PAEP,CDC20,TTK,SEMA3A,MEIOC,CDC25C,AURKA,ASPM,HOXD13,TRIP13,RAD51AP1,CDC25A,STRA8,TEX101,NR5A1,FBXO5,ACVR1C,SULF1,PLCB1,DHX37,PIWIL2,WT1,FBXO43,ADA,OVOL1,DEFB1,RNASE10	27
BP	GO:0000212	meiotic spindle organization	7/1183	15/18800	1.57791e-05	0.000542035	0.000486393	ESPL1,NDC80,AURKA,ASPM,CCNB2,FBXO5,TUBG1	7
BP	GO:0042472	inner ear morphogenesis	19/1183	103/18800	2.03151e-05	0.000693168	0.000622011	DLX6,COL11A1,COL2A1,ZIC1,HOXA1,CHRNA9,USH1C,FOXG1,CTHRC1,OTX1,USH1G,DLX5,GBX2,LHFPL5,EPHB2,TBX1,SCRIB,GRHL3,TBX18	19
BP	GO:0045740	positive regulation of DNA replication	11/1183	40/18800	2.48245e-05	0.000841384	0.000755013	E2F7,CDT1,CDK1,E2F8,DNA2,CDC7,DBF4B,ATAD5,PCNA,CDK2,DBF4	11
BP	GO:0035107	appendage morphogenesis	23/1183	142/18800	2.62669e-05	0.000878559	0.000788371	HOXC10,SP8,HOXC11,HOXA10,DLX6,SHOX2,HOXA11,COL2A1,HOXA13,GREM1,HOXD13,DKK1,HOXD10,LRP4,ALX3,SP9,TWIST1,DLX5,SALL4,CRABP2,HOXD9,OSR2,PITX1	23
BP	GO:0035108	limb morphogenesis	23/1183	142/18800	2.62669e-05	0.000878559	0.000788371	HOXC10,SP8,HOXC11,HOXA10,DLX6,SHOX2,HOXA11,COL2A1,HOXA13,GREM1,HOXD13,DKK1,HOXD10,LRP4,ALX3,SP9,TWIST1,DLX5,SALL4,CRABP2,HOXD9,OSR2,PITX1	23
BP	GO:0000281	mitotic cytokinesis	15/1183	71/18800	2.85816e-05	0.000949733	0.000852238	KIF4A,CENPA,ESPL1,PLK1,KIF23,ANLN,CEP55,KIF20A,RACGAP1,STMN1,NUSAP1,ECT2,INCENP,KIF20B,CKAP2	15
BP	GO:0044818	mitotic G2/M transition checkpoint	12/1183	48/18800	3.05902e-05	0.00100987	0.000906206	HMGA2,TICRR,CDC6,PLK1,CLSPN,ORC1,CDK1,CHEK1,DTL,BRCA1,BLM,TOPBP1	12
BP	GO:0000910	cytokinesis	26/1183	174/18800	3.44203e-05	0.00112899	0.00101309	KIF4A,CENPA,ESPL1,AURKB,CDC6,PLK1,KIF23,ANLN,KIF14,CEP55,AURKA,E2F7,PRC1,KIF20A,RACGAP1,STMN1,E2F8,NUSAP1,PLK4,ECT2,FSD1,SEPTIN14,INCENP,KIF20B,CKAP2,SEPTIN5	26
BP	GO:0000079	regulation of cyclin-dependent protein serine/threonine kinase activity	18/1183	98/18800	3.53495e-05	0.00115203	0.00103377	CCNE1,CDC6,PLK1,PKMYT1,CDC25C,CDKN3,CCNA2,CCNB2,CDC25A,CCNB1,PSRC1,BLM,CDK5R2,CKS1B,CCNP,CDKN2A,CCNF,CCNE2	18
BP	GO:0030261	chromosome condensation	12/1183	49/18800	3.82116e-05	0.00122954	0.00110332	HMGA2,NCAPH,TOP2A,PLK1,CDCA5,NCAPG,CDK1,NUSAP1,NCAPG2,NCAPD2,H1-3,NCAPD3	12
BP	GO:0030850	prostate gland development	12/1183	49/18800	3.82116e-05	0.00122954	0.00110332	HOXB13,HOXA10,HOXA11,SERPINB5,HOXA13,HOXD13,PRLR,SULF1,PLAG1,FOXA1,FKBP4,CYP19A1	12
BP	GO:2000573	positive regulation of DNA biosynthetic process	15/1183	73/18800	4.03663e-05	0.00127882	0.00114754	AURKB,NEK2,GREM1,GINS1,GINS4,DSCC1,GINS2,RFC4,CHTF18,GINS3,PCNA,RFC5,CCT5,RFC3,CCT6A	15
BP	GO:0007095	mitotic G2 DNA damage checkpoint signaling	10/1183	35/18800	4.03683e-05	0.00127882	0.00114754	HMGA2,TICRR,PLK1,CLSPN,CDK1,CHEK1,DTL,BRCA1,BLM,TOPBP1	10
BP	GO:0044771	meiotic cell cycle phase transition	6/1183	12/18800	4.07492e-05	0.00127882	0.00114754	TTK,NDC80,CDC25C,CCNB2,CDC25A,OVOL1	6
BP	GO:0051255	spindle midzone assembly	6/1183	12/18800	4.07492e-05	0.00127882	0.00114754	KIF4A,AURKB,KIF23,PRC1,RACGAP1,INCENP	6
BP	GO:0006836	neurotransmitter transport	29/1183	207/18800	4.25836e-05	0.00132819	0.00119185	RAB3B,RIMS2,SLC6A17,SNCG,PFN2,SV2A,SLC6A15,GABRQ,SLC28A2,SYT1,SYT5,SLC29A4,SLC6A8,KCNMB4,GRM4,CHRNA5,PRKCG,SLC38A1,GFAP,GRIK5,CPLX1,UNC13A,SCRIB,SLC17A7,TH,SLC1A6,ASIC1,SEPTIN5,OTOF	29
BP	GO:0048736	appendage development	26/1183	177/18800	4.63761e-05	0.00142895	0.00128226	HOXC10,SP8,HOXC11,HOXA10,HOXC13,DLX6,SHOX2,HOXA11,COL2A1,HOXA13,GREM1,HOXD13,KREMEN2,DKK1,HOXD10,LRP4,ALX3,SP9,TWIST1,DLX5,PITX2,SALL4,CRABP2,HOXD9,OSR2,PITX1	26
BP	GO:0060173	limb development	26/1183	177/18800	4.63761e-05	0.00142895	0.00128226	HOXC10,SP8,HOXC11,HOXA10,HOXC13,DLX6,SHOX2,HOXA11,COL2A1,HOXA13,GREM1,HOXD13,KREMEN2,DKK1,HOXD10,LRP4,ALX3,SP9,TWIST1,DLX5,PITX2,SALL4,CRABP2,HOXD9,OSR2,PITX1	26
BP	GO:0061640	cytoskeleton-dependent cytokinesis	18/1183	100/18800	4.67598e-05	0.00143209	0.00128508	KIF4A,CENPA,ESPL1,AURKB,PLK1,KIF23,ANLN,CEP55,KIF20A,RACGAP1,STMN1,NUSAP1,ECT2,SEPTIN14,INCENP,KIF20B,CKAP2,SEPTIN5	18
BP	GO:0043583	ear development	30/1183	219/18800	4.8556e-05	0.0014782	0.00132645	DLX6,COL11A1,COL2A1,ZIC1,HOXA1,HOXA13,CCNA2,MCM2,CHRNA9,USH1C,FOXG1,CTHRC1,STRA6,OTX1,USH1G,TWIST1,GJB6,SOX2,DLX5,GJB2,GBX2,SIX2,LHFPL5,EPHB2,NKX3-2,TBX1,SCRIB,GRHL3,OSR2,TBX18	30
BP	GO:1904029	regulation of cyclin-dependent protein kinase activity	18/1183	101/18800	5.36046e-05	0.00162218	0.00145565	CCNE1,CDC6,PLK1,PKMYT1,CDC25C,CDKN3,CCNA2,CCNB2,CDC25A,CCNB1,PSRC1,BLM,CDK5R2,CKS1B,CCNP,CDKN2A,CCNF,CCNE2	18
BP	GO:0051785	positive regulation of nuclear division	13/1183	59/18800	6.07171e-05	0.00182654	0.00163904	ESPL1,DLGAP5,PRAP1,HOXA13,AURKA,CDT1,RAD51AP1,NUSAP1,SPHK1,STRA8,PLCB1,PIWIL2,IGF2	13
BP	GO:0044843	cell cycle G1/S phase transition	33/1183	255/18800	6.58647e-05	0.00196224	0.00176081	CCNE1,FAM83D,PRAP1,CDC6,GTSE1,RRM2,KIF14,CDKN3,E2F7,CCNA2,IQGAP3,E2F1,CDC25A,TERT,STIL,TM4SF5,EZH2,EIF4EBP1,CDKN2A,CDC7,SOX2,CCNE2,SKP2,CHEK2,MTBP,PLCB1,POLE,CDK2,DBF4,CDK4,SUSD2,PRKDC,SASS6	33
BP	GO:0051782	negative regulation of cell division	7/1183	18/18800	6.59997e-05	0.00196224	0.00176081	AURKB,E2F7,ASPM,ORC6,E2F8,BLM,SUSD2	7
BP	GO:0006282	regulation of DNA repair	23/1183	152/18800	7.84114e-05	0.0023177	0.00207977	HMGA2,FOXM1,AUNIP,POLQ,TEX15,RAD51AP1,RAD51,CHEK1,FANCB,TIMELESS,EYA2,PARPBP,BRCA1,TWIST1,DDX11,PRKCG,RMI2,PCNA,H2AX,ACTL6A,OTUB2,CGAS,PRKDC	23
BP	GO:0090307	mitotic spindle assembly	14/1183	69/18800	8.3686e-05	0.0024593	0.00220684	MYBL2,KIF4A,TPX2,CDC20,AURKB,KIFC1,NEK2,PLK1,KIF23,PRC1,KIF15,KIF11,RACGAP1,CHEK2	14
BP	GO:0007548	sex differentiation	35/1183	281/18800	8.8132e-05	0.00257508	0.00231073	HOXA10,HOXA11,SEMA3A,DMRTC2,HOXA13,PTPRN,ASPM,HOXD13,CENPI,ZFY,TEX19,SYCP2,GREB1L,BRIP1,STRA6,HNF4A,LEP,KIF18A,NR5A1,FANCA,DMC1,VGF,SOX15,LHX1,BIK,CBX2,NUDT1,FANCG,DHX37,WT1,MMP14,INHA,COL9A3,FKBP4,CYP19A1	35
BP	GO:0061138	morphogenesis of a branching epithelium	26/1183	185/18800	9.85409e-05	0.002855	0.00256193	HOXB13,FOXD1,HOXA11,SEMA3A,HOXB7,HOXA13,GREM1,HOXD13,TIMELESS,HOXD11,GREB1L,SMO,ADM,HHIP,SULF1,GBX2,SIX2,LHX1,LAMA5,LAMA1,MDK,WT1,FOXA1,MMP14,DLG5,ST14	26
BP	GO:0007076	mitotic chromosome condensation	7/1183	19/18800	9.88357e-05	0.002855	0.00256193	NCAPH,PLK1,CDCA5,NCAPG,NUSAP1,NCAPD2,NCAPD3	7
BP	GO:0010972	negative regulation of G2/M transition of mitotic cell cycle	13/1183	62/18800	0.000104536	0.00300259	0.00269436	HMGA2,AURKB,TICRR,CDC6,PLK1,CLSPN,ORC1,CDK1,CHEK1,DTL,BRCA1,BLM,TOPBP1	13
BP	GO:0006334	nucleosome assembly	20/1183	126/18800	0.00011506	0.00328631	0.00294895	HJURP,MCM2,CENPW,OIP5,ASF1B,H2BC11,H2BC8,TSPYL5,H2BC9,H3C8,CHAF1B,H2BC17,H3C4,CHAF1A,H2AX,H3C6,H2BC7,H1-3,MIS18A,H2BU1	20
BP	GO:0044728	DNA methylation or demethylation	17/1183	98/18800	0.000121187	0.00344199	0.00308866	TEX15,TDRD5,TDRD12,ZFP57,DNMT3B,APOBEC3B,BRCA1,HELLS,EZH2,SPOCD1,MAEL,PIWIL2,WT1,DNMT3A,TDG,APOBEC1,MIS18A	17
BP	GO:0009314	response to radiation	48/1183	438/18800	0.00012813	0.00361897	0.00324747	GNGT1,HMGA2,AURKB,RAD54L,TICRR,PRAP1,HOXA1,ELOVL4,PBK,RAD51AP1,CDC25A,GUCA1A,FOXB1,ADAM2,XRCC2,RAD51,AQP4,CHEK1,MMP1,DTL,ECT2,BRCA1,NETO1,SEMA5B,BLM,PCLAF,TSPYL5,NDRG4,RAG1,FEN1,H2AW,TULP1,ATOH7,CHEK2,SLC24A2,RAD54B,PCNA,FANCG,H2AX,CXCL10,TOPBP1,TH,DNMT3A,APOBEC1,CERS1,PRKDC,MMP3,FANCD2	48
BP	GO:0001763	morphogenesis of a branching structure	27/1183	199/18800	0.000133597	0.00375228	0.00336709	HOXB13,FOXD1,SHOX2,HOXA11,SEMA3A,HOXB7,HOXA13,GREM1,HOXD13,TIMELESS,HOXD11,GREB1L,SMO,ADM,HHIP,SULF1,GBX2,SIX2,LHX1,LAMA5,LAMA1,MDK,WT1,FOXA1,MMP14,DLG5,ST14	27
BP	GO:0010639	negative regulation of organelle organization	41/1183	356/18800	0.000134888	0.00375228	0.00336709	VIL1,TPX2,ESPL1,AURKB,TTK,TUBB4A,TOP2A,PRAP1,PLK1,NDC80,BUB1,BUB1B,PFN2,CDT1,TRIP13,MCM2,ZWINT,CENPF,MAD2L1,CCNB1,PIF1,STMN1,CHEK1,RHPN2,BRCA1,GCLC,MAP6D1,CCNF,PTTG1,FBXO5,KNTC1,CRACD,TMSB4Y,MTBP,SPDL1,FBXO43,FHOD3,FKBP4,KIF24,FZD9,CKAP2	41
BP	GO:0051446	positive regulation of meiotic cell cycle	8/1183	26/18800	0.000135064	0.00375228	0.00336709	MEIOC,CDC25C,RAD51AP1,CDC25A,STRA8,PLCB1,PIWIL2,OVOL1	8
BP	GO:1902750	negative regulation of cell cycle G2/M phase transition	13/1183	64/18800	0.00014702	0.00406222	0.00364521	HMGA2,AURKB,TICRR,CDC6,PLK1,CLSPN,ORC1,CDK1,CHEK1,DTL,BRCA1,BLM,TOPBP1	13
BP	GO:0006304	DNA modification	19/1183	119/18800	0.000156039	0.00428813	0.00384793	TEX15,TDRD5,TDRD12,ZFP57,DNMT3B,APOBEC3B,NEIL3,BRCA1,HELLS,EZH2,SPOCD1,UNG,MAEL,PIWIL2,WT1,DNMT3A,TDG,APOBEC1,MIS18A	19
BP	GO:2000779	regulation of double-strand break repair	18/1183	110/18800	0.000167576	0.0045804	0.00411021	HMGA2,FOXM1,AUNIP,POLQ,TEX15,RAD51AP1,RAD51,CHEK1,FANCB,TIMELESS,PARPBP,TWIST1,DDX11,RMI2,ACTL6A,OTUB2,CGAS,PRKDC	18
BP	GO:2001020	regulation of response to DNA damage stimulus	31/1183	246/18800	0.000176316	0.00479354	0.00430146	HMGA2,FOXM1,AUNIP,POLQ,TEX15,RAD51AP1,DDIAS,RAD51,CHEK1,FANCB,TIMELESS,EYA2,PARPBP,BRCA1,ANKLE1,TWIST1,FBXO5,DDX11,PRKCG,CHEK2,RMI2,ATAD5,PCNA,PMAIP1,H2AX,ACTL6A,MIF,OTUB2,WDR76,CGAS,PRKDC	31
BP	GO:0006305	DNA alkylation	14/1183	74/18800	0.000183942	0.00489693	0.00439424	TEX15,TDRD5,TDRD12,ZFP57,DNMT3B,BRCA1,HELLS,EZH2,SPOCD1,MAEL,PIWIL2,WT1,DNMT3A,MIS18A	14
BP	GO:0006306	DNA methylation	14/1183	74/18800	0.000183942	0.00489693	0.00439424	TEX15,TDRD5,TDRD12,ZFP57,DNMT3B,BRCA1,HELLS,EZH2,SPOCD1,MAEL,PIWIL2,WT1,DNMT3A,MIS18A	14
BP	GO:0045005	DNA-templated DNA replication maintenance of fidelity	11/1183	49/18800	0.000185625	0.00489693	0.00439424	EME1,RAD51,TIMELESS,TONSL,BLM,DNA2,TRAIP,DDX11,POLE,PCNA,ALYREF	11
BP	GO:0051315	attachment of mitotic spindle microtubules to kinetochore	6/1183	15/18800	0.000187315	0.00489693	0.00439424	KIF2C,AURKB,NDC80,NUF2,CDT1,CENPE	6
BP	GO:0072498	embryonic skeletal joint development	6/1183	15/18800	0.000187315	0.00489693	0.00439424	HOXC11,SHOX2,HOXA11,COL2A1,SLC2A10,OSR2	6
BP	GO:0086069	bundle of His cell to Purkinje myocyte communication	6/1183	15/18800	0.000187315	0.00489693	0.00439424	DSP,PKP2,DSC2,DSG2,SCN5A,JUP	6
BP	GO:2000780	negative regulation of double-strand break repair	9/1183	34/18800	0.000187537	0.00489693	0.00439424	HMGA2,AUNIP,POLQ,FANCB,PARPBP,TWIST1,RMI2,OTUB2,CGAS	9
BP	GO:0033314	mitotic DNA replication checkpoint signaling	5/1183	10/18800	0.000188788	0.00489693	0.00439424	TICRR,CDC6,CLSPN,ORC1,TOPBP1	5
BP	GO:0051231	spindle elongation	5/1183	10/18800	0.000188788	0.00489693	0.00439424	KIF4A,AURKB,KIF23,PRC1,RACGAP1	5
BP	GO:0000082	G1/S transition of mitotic cell cycle	29/1183	225/18800	0.000190817	0.00492442	0.00441891	CCNE1,PRAP1,CDC6,GTSE1,RRM2,KIF14,CDKN3,E2F7,IQGAP3,E2F1,CDC25A,TERT,STIL,TM4SF5,EZH2,EIF4EBP1,CDKN2A,CDC7,CCNE2,SKP2,CHEK2,MTBP,PLCB1,POLE,CDK2,DBF4,CDK4,PRKDC,SASS6	29
BP	GO:0007098	centrosome cycle	20/1183	131/18800	0.000198125	0.00508722	0.00456499	NEK2,PLK1,NDC80,AURKA,SGO1,KIF11,WDR62,CDK1,XRCC2,CHEK1,PLK4,STIL,BRCA1,PCLAF,SLC16A1,CCNF,CDK2,RANBP1,SSX2IP,SASS6	20
BP	GO:0031497	chromatin assembly	27/1183	205/18800	0.000219441	0.00556356	0.00499244	HMGA2,HJURP,MCM2,CENPW,OIP5,ASF1B,H2BC11,H2BC8,HELLS,EZH2,TSPYL5,H2BC9,H3C8,CHAF1B,H2BC17,SUV39H1,H3C4,CHAF1A,H2AX,CDK2,H3C6,DNMT3A,H2BC7,H1-3,APOBEC1,MIS18A,H2BU1	27
BP	GO:0030900	forebrain development	42/1183	376/18800	0.000219545	0.00556356	0.00499244	IGF2BP1,POU4F1,HAP1,SEMA3A,SLC2A1,KIF14,ASPM,E2F1,FOXB1,WDR62,LHX5,PCSK1,FOXG1,STIL,DKK1,SMO,TBR1,EFNA2,OTX1,CDK5R2,TACC3,LHX2,EZH2,CDH2,SOX2,DLX5,RAC3,PITX2,GBX2,AVPR1A,PLCB1,LHX1,EPHB2,FBXO45,H2AX,MDK,SSTR2,SCN5A,SIX3,TH,VAX2,PITX1	42
BP	GO:0035270	endocrine system development	20/1183	132/18800	0.00021996	0.00556356	0.00499244	PCSK1,PDX1,GIP,SMO,STRA6,HNF4A,CGA,FOXE1,HOXA3,NR5A1,CDH2,SOX2,PITX2,NKX6-1,RFX6,MDK,WT1,SIX3,TBX1,PITX1	20
BP	GO:2000243	positive regulation of reproductive process	15/1183	85/18800	0.000245735	0.00618473	0.00554984	SEMA3A,MEIOC,CDC25C,AURKA,RAD51AP1,CDC25A,STRA8,NR5A1,PLCB1,DHX37,PIWIL2,WT1,OVOL1,DEFB1,RNASE10	15
BP	GO:0045738	negative regulation of DNA repair	9/1183	36/18800	0.000300385	0.00752295	0.00675068	HMGA2,AUNIP,POLQ,FANCB,PARPBP,TWIST1,RMI2,OTUB2,CGAS	9
BP	GO:0031055	chromatin remodeling at centromere	5/1183	11/18800	0.000328176	0.00809925	0.00726782	HJURP,CENPW,OIP5,HELLS,MIS18A	5
BP	GO:0035404	histone-serine phosphorylation	5/1183	11/18800	0.000328176	0.00809925	0.00726782	HMGA2,AURKB,AURKA,PRKAA2,VRK1	5
BP	GO:0060272	embryonic skeletal joint morphogenesis	5/1183	11/18800	0.000328176	0.00809925	0.00726782	HOXC11,SHOX2,HOXA11,COL2A1,OSR2	5
BP	GO:0001890	placenta development	21/1183	147/18800	0.000354549	0.00870786	0.00781396	E2F7,GJB3,TEX19,E2F8,MDFI,STC2,PLK4,PLAC1,LEP,ADM,CCNF,GJB2,SOX15,CDX2,FOSL1,ADA,ASCL2,ETNK2,PLCD3,ST14,IGF2	21
BP	GO:0030279	negative regulation of ossification	9/1183	37/18800	0.000374998	0.00916582	0.00822491	GREM1,KREMEN2,DKK1,AHSG,LRP4,ENPP1,CALCA,MDK,RFLNA	9
BP	GO:0034728	nucleosome organization	22/1183	159/18800	0.00040908	0.00995102	0.00892951	HJURP,HMGA1,MCM2,CENPW,OIP5,ASF1B,H2BC11,H2BC8,TSPYL5,H2BC9,H2AW,H3C8,CHAF1B,H2BC17,H3C4,CHAF1A,H2AX,H3C6,H2BC7,H1-3,MIS18A,H2BU1	22
BP	GO:0030199	collagen fibril organization	12/1183	62/18800	0.000419534	0.0101567	0.00911409	COL11A1,COL2A1,GREM1,FKBP10,MMP11,P3H4,LOXL2,COL12A1,ADAMTS7,COL11A2,TLL2,COL1A1	12
BP	GO:0048839	inner ear development	25/1183	192/18800	0.000439477	0.0105891	0.0095021	DLX6,COL11A1,COL2A1,ZIC1,HOXA1,HOXA13,CCNA2,MCM2,CHRNA9,USH1C,FOXG1,CTHRC1,OTX1,USH1G,GJB6,SOX2,DLX5,GJB2,GBX2,LHFPL5,EPHB2,TBX1,SCRIB,GRHL3,TBX18	25
BP	GO:2000027	regulation of animal organ morphogenesis	19/1183	129/18800	0.000450863	0.0108122	0.00970228	HOXC11,HOXA11,HOXB7,GREM1,SAPCD2,SP6,DKK1,SMO,CTHRC1,SULF1,SIX2,LHX1,WT1,TBX1,GPC6,GRHL3,CELSR3,VANGL2,DVL3	19
BP	GO:2000278	regulation of DNA biosynthetic process	18/1183	119/18800	0.000454557	0.0108496	0.00973585	AURKB,NEK2,GREM1,GINS1,PIF1,GINS4,DSCC1,GINS2,CHEK1,RFC4,CHTF18,GINS3,PCNA,RFC5,CCT5,RFC3,CERS1,CCT6A	18
BP	GO:0035136	forelimb morphogenesis	9/1183	38/18800	0.000464238	0.0110289	0.00989674	SHOX2,HOXA11,HOXA13,HOXD10,ALX3,TWIST1,CRABP2,HOXD9,OSR2	9
BP	GO:0032886	regulation of microtubule-based process	30/1183	249/18800	0.000482178	0.0114018	0.0102314	TPX2,TUBB4A,HAP1,PLK1,SKA1,AURKA,SPAG5,KIF15,WDR62,SKA3,STMN1,PSRC1,PLK4,STIL,CALY,BRCA1,NEFH,MAP6D1,FSD1,TACC3,KIF18A,TEX101,PRKAA2,CCNF,CNIH2,FKBP4,DEFB1,RNASE10,SASS6,CKAP2	30
BP	GO:0072078	nephron tubule morphogenesis	13/1183	72/18800	0.000497214	0.0117029	0.0105016	FOXD1,HOXA11,HOXB7,GREM1,HOXD11,GREB1L,SMO,IRX2,SIX2,LHX1,LAMA5,IRX1,WT1	13
BP	GO:0035115	embryonic forelimb morphogenesis	8/1183	31/18800	0.000514704	0.0120588	0.0108209	SHOX2,HOXA11,HOXA13,ALX3,TWIST1,CRABP2,HOXD9,OSR2	8
BP	GO:0032465	regulation of cytokinesis	15/1183	91/18800	0.000526272	0.0122732	0.0110133	AURKB,CDC6,PLK1,KIF23,KIF14,AURKA,E2F7,PRC1,KIF20A,RACGAP1,E2F8,PLK4,ECT2,FSD1,KIF20B	15
BP	GO:0098911	regulation of ventricular cardiac muscle cell action potential	5/1183	12/18800	0.00053348	0.0123845	0.0111132	DSP,PKP2,DSC2,DSG2,JUP	5
BP	GO:2001021	negative regulation of response to DNA damage stimulus	14/1183	82/18800	0.000554686	0.0128183	0.0115024	HMGA2,AUNIP,POLQ,DDIAS,FANCB,PARPBP,TWIST1,FBXO5,CHEK2,RMI2,ATAD5,MIF,OTUB2,CGAS	14
BP	GO:0010212	response to ionizing radiation	20/1183	142/18800	0.000583666	0.0133665	0.0119943	HMGA2,RAD54L,TICRR,PRAP1,RAD51AP1,XRCC2,RAD51,ECT2,BRCA1,BLM,TSPYL5,CHEK2,RAD54B,H2AX,CXCL10,TOPBP1,DNMT3A,APOBEC1,PRKDC,FANCD2	20
BP	GO:0055123	digestive system development	20/1183	142/18800	0.000583666	0.0133665	0.0119943	SHOX2,HOXA13,HOXD13,BARX1,CPS1,PDX1,CLDN18,TYMS,GIP,SMO,STRA6,FOXE1,RBPMS2,NKX2-3,SIX2,CDX2,CXCL8,NKX3-2,ADA,IGF2	20
BP	GO:0009953	dorsal/ventral pattern formation	15/1183	92/18800	0.000592888	0.0135168	0.0121292	SP8,HOXA11,GREM1,MDFI,FOXG1,HOXD11,SMO,LRP4,LHX2,HHIP,LHX1,FOXA1,SIX3,TLL2,VAX2	15
BP	GO:0019730	antimicrobial humoral response	18/1183	122/18800	0.000616772	0.0139985	0.0125615	FGB,PGC,TF,F2,IL36RN,FGA,SFTPD,CXCL5,H2BC11,DMBT1,PRSS3,H2BC8,CXCL8,GAPDH,CXCL10,H2BC7,CXCL11,DEFB1	18
BP	GO:0046661	male sex differentiation	22/1183	164/18800	0.000629221	0.0142176	0.0127581	HOXA10,HOXA11,SEMA3A,HOXA13,ASPM,HOXD13,TEX19,SYCP2,GREB1L,BRIP1,KIF18A,NR5A1,FANCA,SOX15,BIK,NUDT1,DHX37,WT1,MMP14,INHA,COL9A3,FKBP4	22
BP	GO:0040020	regulation of meiotic nuclear division	8/1183	32/18800	0.000648806	0.0145953	0.013097	CDC20,TRIP13,RAD51AP1,STRA8,FBXO5,PLCB1,PIWIL2,FBXO43	8
BP	GO:0072088	nephron epithelium morphogenesis	13/1183	74/18800	0.000653092	0.014627	0.0131254	FOXD1,HOXA11,HOXB7,GREM1,HOXD11,GREB1L,SMO,IRX2,SIX2,LHX1,LAMA5,IRX1,WT1	13
BP	GO:0009069	serine family amino acid metabolic process	9/1183	40/18800	0.000695169	0.015501	0.0139098	PHGDH,PSPHP1,GLDC,PSAT1,GCLC,CBS,SHMT2,PSPH,SDS	9
BP	GO:0001658	branching involved in ureteric bud morphogenesis	11/1183	57/18800	0.000740688	0.0164439	0.0147559	FOXD1,HOXA11,HOXB7,GREM1,HOXD11,GREB1L,SMO,SIX2,LHX1,LAMA5,WT1	11
BP	GO:0031023	microtubule organizing center organization	20/1183	145/18800	0.000764482	0.0168984	0.0151637	NEK2,PLK1,NDC80,AURKA,SGO1,KIF11,WDR62,CDK1,XRCC2,CHEK1,PLK4,STIL,BRCA1,PCLAF,SLC16A1,CCNF,CDK2,RANBP1,SSX2IP,SASS6	20
BP	GO:2000177	regulation of neural precursor cell proliferation	14/1183	85/18800	0.000804186	0.0176991	0.0158822	ASPM,WDR62,LHX5,FOXG1,SHCBP1,SMO,LHX2,CDH2,GPR37L1,VAX1,LHX1,MDK,SIX3,FZD9	14
BP	GO:0001833	inner cell mass cell proliferation	5/1183	13/18800	0.000822128	0.0179726	0.0161276	GINS1,GINS4,CHEK1,NCAPG2,SALL4	5
BP	GO:0001655	urogenital system development	38/1183	352/18800	0.000823906	0.0179726	0.0161276	HOXB13,HOXC11,HOXA10,FOXD1,HOXA11,SERPINB5,HOXB7,HOXA13,GREM1,HOXD13,CENPF,FOXB1,SIM1,PRLR,HOXD11,GREB1L,SMO,STRA6,LRP4,HELLS,IRX2,SULF1,SIX2,LHX1,PLAG1,EPHB2,LAMA5,IRX1,WT1,FOXA1,OVOL1,LIN28A,FKBP4,DLG5,OSR2,TBX18,VANGL2,CYP19A1	38
BP	GO:0060562	epithelial tube morphogenesis	36/1183	328/18800	0.000827218	0.0179726	0.0161276	FOXD1,HOXA11,HOXB7,GREM1,TIMELESS,HOXD11,GREB1L,STIL,SMO,CTHRC1,LHX2,ADM,NDRG4,TWIST1,HHIP,IRX2,GBX2,FOXH1,SALL4,SIX2,LHX1,KIF20B,LAMA5,IRX1,LAMA1,MDK,CXCL10,WT1,FOXA1,MMP14,SCRIB,DLG5,GRHL3,ST14,VANGL2,DVL3	36
BP	GO:0031297	replication fork processing	9/1183	41/18800	0.000841602	0.0182073	0.0163382	EME1,RAD51,TONSL,BLM,DNA2,TRAIP,DDX11,PCNA,ALYREF	9
BP	GO:0061333	renal tubule morphogenesis	13/1183	76/18800	0.000848246	0.0182698	0.0163943	FOXD1,HOXA11,HOXB7,GREM1,HOXD11,GREB1L,SMO,IRX2,SIX2,LHX1,LAMA5,IRX1,WT1	13
BP	GO:0023061	signal release	46/1183	451/18800	0.000851681	0.0182698	0.0163943	FGB,SYT13,HTR2C,RIMS2,FOXD1,GAL,SNCG,PFN2,PTPRN,SV2A,SYT1,SYT5,HNF1A,FGA,IL11,PDX1,GIP,C1QTNF12,HNF4A,KCNMB4,CGA,LEP,SLC16A1,ADM,GRM4,CHRNA5,ACVR1C,PRKCG,VGF,NKX6-1,SCG5,RFX6,GRIK5,BMP8A,CPLX1,UNC13A,MIF,SCRIB,INHA,ASIC1,IRS1,TNFSF11,HCAR2,CYP19A1,SEPTIN5,OTOF	46
BP	GO:0070193	synaptonemal complex organization	7/1183	26/18800	0.000874943	0.01869	0.0167714	PLK1,MEIOC,TEX15,TRIP13,SYCP2,P3H4,HSPA2	7
BP	GO:0001708	cell fate specification	15/1183	96/18800	0.000935925	0.019909	0.0178652	HOXC10,POU4F1,HOXA11,HOXA13,EYA2,DKK1,SMO,TBR1,HOXD10,SOX2,SIX2,TBX10,FOXA1,TBX1,TBX18	15
BP	GO:0072028	nephron morphogenesis	13/1183	77/18800	0.000962838	0.0203961	0.0183024	FOXD1,HOXA11,HOXB7,GREM1,HOXD11,GREB1L,SMO,IRX2,SIX2,LHX1,LAMA5,IRX1,WT1	13
BP	GO:0051053	negative regulation of DNA metabolic process	20/1183	148/18800	0.000991629	0.0209188	0.0187714	HMGA2,CDC6,AUNIP,POLQ,CDT1,PIF1,CHEK1,FANCB,TIMELESS,PARPBP,ANKLE1,BLM,TWIST1,FBXO5,RMI2,GMNN,OTUB2,H1-3,CGAS,CERS1	20
BP	GO:1901605	alpha-amino acid metabolic process	25/1183	203/18800	0.00100205	0.0210514	0.0188904	NAT8L,PAH,PHGDH,CPS1,FTCD,PSPHP1,GLDC,PSAT1,PLOD2,GCLC,HNF4A,MAT1A,CBS,AGMAT,CAD,GAD1,PIPOX,TH,GPT2,SHMT2,GLYATL1,SLC25A21,PSPH,SDS,PPAT	25
BP	GO:0032330	regulation of chondrocyte differentiation	10/1183	51/18800	0.00112171	0.0233719	0.0209727	SHOX2,HOXA11,GREM1,PTHLH,SIX2,LOXL2,NKX3-2,ADAMTS7,MDK,RFLNA	10
BP	GO:2000179	positive regulation of neural precursor cell proliferation	10/1183	51/18800	0.00112171	0.0233719	0.0209727	ASPM,WDR62,LHX5,FOXG1,SMO,LHX2,GPR37L1,LHX1,MDK,FZD9	10
BP	GO:0016331	morphogenesis of embryonic epithelium	20/1183	150/18800	0.00117332	0.0243193	0.0218228	GREM1,PDX1,STIL,CTHRC1,LHX2,ADM,TWIST1,IRX2,SULF1,SALL4,KIF20B,LAMA5,IRX1,SCRIB,GRHL3,TBX18,WNT16,ST14,VANGL2,DVL3	20
BP	GO:0010817	regulation of hormone levels	49/1183	496/18800	0.00117674	0.0243193	0.0218228	FGB,HTR2C,RIMS2,CRABP1,KLK6,SLC5A5,FOXD1,GAL,PTPRN,HNF1A,FGA,PCSK1,IL11,PDX1,STC2,SLC7A5,GIP,C1QTNF12,HNF4A,CGA,LEP,ADH1B,FOXE1,SLC16A1,ADM,UGT2B7,NR5A1,ECE2,ACVR1C,VGF,NKX6-1,AKR1C4,SCG5,CRABP2,DHRS2,RFX6,CLCN2,BMP8A,CPLX1,FOXA1,DIO2,INHA,PCSK2,ERO1A,IRS1,TNFSF11,HCAR2,UGT2B4,CYP19A1	49
BP	GO:0006284	base-excision repair	9/1183	43/18800	0.00120964	0.0247568	0.0222154	HMGA2,POLQ,NEIL3,DNA2,FEN1,UNG,POLE,PCNA,TDG	9
BP	GO:0007100	mitotic centrosome separation	5/1183	14/18800	0.00121292	0.0247568	0.0222154	NEK2,AURKA,KIF11,CHEK1,RANBP1	5
BP	GO:0051984	positive regulation of chromosome segregation	5/1183	14/18800	0.00121292	0.0247568	0.0222154	AURKB,PRAP1,CDC6,CDT1,CCNB1	5
BP	GO:0019228	neuronal action potential	8/1183	35/18800	0.00122713	0.0247568	0.0222154	FGF12,GPR35,KCND2,KCNMB4,SCN5A,SCN4A,SCN8A,SCN1A	8
BP	GO:0040001	establishment of mitotic spindle localization	8/1183	35/18800	0.00122713	0.0247568	0.0222154	CENPA,ESPL1,PLK1,NDC80,MAD2L1,SAPCD2,NUSAP1,SPDL1	8
BP	GO:0048048	embryonic eye morphogenesis	8/1183	35/18800	0.00122713	0.0247568	0.0222154	STRA6,TWIST1,MFAP5,MFAP2,SIX3,TH,WNT16,VAX2	8
BP	GO:0051216	cartilage development	24/1183	195/18800	0.00126193	0.0253583	0.0227552	HMGA2,COL11A1,SHOX2,HOXA11,COL2A1,GREM1,HOXC4,TYMS,PTHLH,LEP,HOXA3,SULF1,SIX2,LOXL2,NKX3-2,ADAMTS7,BMP8A,MDK,COL11A2,RFLNA,OSR2,SNORC,COL1A1,PITX1	24
BP	GO:0001701	in utero embryonic development	40/1183	387/18800	0.00140431	0.0280061	0.0251311	MYO18B,NEK2,RRM2,E2F7,GINS1,CCNB2,PLPP4,CCNB1,XRCC2,GINS4,GJB3,E2F8,MDFI,CHEK1,FKBP10,PLK4,STIL,SMO,ASF1B,FOXD3,NCAPG2,ADM,TWIST1,ACVR1C,SOX15,SALL4,DBN1,DSC3,CDX2,FOSL1,ACTL6A,ADA,MYH6,ASCL2,ETNK2,PLCD3,ST14,PSPH,IGF2,BYSL	40
BP	GO:0007141	male meiosis I	7/1183	28/18800	0.00141022	0.0280061	0.0251311	MEIOC,DMRTC2,TRIP13,BRDT,DMC1,HSPA2,HSF2BP	7
BP	GO:0042634	regulation of hair cycle	7/1183	28/18800	0.00141022	0.0280061	0.0251311	GAL,EPS8L3,TERT,TRPV3,SMO,CDH3,KRT17	7
BP	GO:0045840	positive regulation of mitotic nuclear division	9/1183	44/18800	0.00143708	0.0284285	0.0255102	ESPL1,DLGAP5,PRAP1,HOXA13,AURKA,CDT1,NUSAP1,SPHK1,IGF2	9
BP	GO:0001832	blastocyst growth	6/1183	21/18800	0.00146541	0.0286543	0.0257128	GINS1,GINS4,CHEK1,NCAPG2,ACVR1C,SALL4	6
BP	GO:0009070	serine family amino acid biosynthetic process	6/1183	21/18800	0.00146541	0.0286543	0.0257128	PHGDH,PSPHP1,PSAT1,CBS,SHMT2,PSPH	6
BP	GO:0060065	uterus development	6/1183	21/18800	0.00146541	0.0286543	0.0257128	HOXA10,HOXA11,GREB1L,STRA6,LHX1,CYP19A1	6
BP	GO:0051302	regulation of cell division	23/1183	186/18800	0.00148032	0.028835	0.025875	KIF18B,AURKB,CDC6,PLK1,KIF23,KIF14,AURKA,E2F7,ASPM,PRC1,KIF20A,ORC6,RACGAP1,E2F8,PLK4,ECT2,FGF5,BLM,FSD1,KIF20B,MDK,SUSD2,IGF2	23
BP	GO:0048477	oogenesis	15/1183	101/18800	0.00158776	0.0308099	0.0276471	YBX2,MEIOC,TDRD5,AURKA,ASPM,TRIP13,ZFY,SOHLH1,STRA8,FBXO5,SOHLH2,DMC1,MEI4,PIWIL2,MDK	15
BP	GO:0021987	cerebral cortex development	16/1183	112/18800	0.00171015	0.0323671	0.0290445	SLC2A1,KIF14,ASPM,WDR62,FOXG1,SMO,TBR1,CDK5R2,TACC3,LHX2,CDH2,PLCB1,FBXO45,H2AX,MDK,TH	16
BP	GO:0007411	axon guidance	27/1183	234/18800	0.00171582	0.0323671	0.0290445	FOXD1,TUBB2B,SEMA3A,TUBB3,FOXG1,ARTN,EVX1,SMO,TBR1,EFNA2,SEMA5B,CDK5R2,LHX2,LAMC2,TMEFF1,DLX5,VAX1,GBX2,L1CAM,LHX1,EPHB2,LAMA5,IGSF9,LAMA1,GAP43,EPHA8,KIF5A	27
BP	GO:0002070	epithelial cell maturation	5/1183	15/18800	0.00172572	0.0323671	0.0290445	HOXB13,TYMS,NKX6-1,FOXA1,SIX3	5
BP	GO:0021534	cell proliferation in hindbrain	5/1183	15/18800	0.00172572	0.0323671	0.0290445	LHX5,SMO,GPR37L1,GBX2,LHX1	5
BP	GO:0021924	cell proliferation in external granule layer	5/1183	15/18800	0.00172572	0.0323671	0.0290445	LHX5,SMO,GPR37L1,GBX2,LHX1	5
BP	GO:0021930	cerebellar granule cell precursor proliferation	5/1183	15/18800	0.00172572	0.0323671	0.0290445	LHX5,SMO,GPR37L1,GBX2,LHX1	5
BP	GO:0051299	centrosome separation	5/1183	15/18800	0.00172572	0.0323671	0.0290445	NEK2,AURKA,KIF11,CHEK1,RANBP1	5
BP	GO:0060707	trophoblast giant cell differentiation	5/1183	15/18800	0.00172572	0.0323671	0.0290445	E2F7,E2F8,MDFI,PLK4,SOX15	5
BP	GO:2000104	negative regulation of DNA-templated DNA replication	5/1183	15/18800	0.00172572	0.0323671	0.0290445	CDT1,TIMELESS,BLM,FBXO5,GMNN	5
BP	GO:0050954	sensory perception of mechanical stimulus	22/1183	177/18800	0.00173596	0.0323671	0.0290445	COL11A1,BIRC5,COL2A1,HOXA1,CHRNA9,OTOGL,USH1C,COCH,USH1G,OTOG,GJB6,GJB2,ESPNL,LHFPL5,ATP6V0A4,TRPA1,TBX1,TH,COL11A2,SCN1A,COL1A1,OTOF	22
BP	GO:0051656	establishment of organelle localization	41/1183	404/18800	0.00174069	0.0323671	0.0290445	KIF1A,CENPA,ESPL1,KIF2C,AURKB,KIFC1,DLGAP5,FAM83D,HAP1,PLK1,CDCA5,MEIOC,NDC80,NUF2,CDCA8,KIF14,KIF3C,UCHL1,CDT1,SPAG5,CENPF,MAD2L1,CENPE,CCNB1,SAPCD2,PSRC1,NUSAP1,MARK1,NEFH,INCENP,KIF18A,CDH3,DYNC1I1,SPDL1,DNM1,WASF1,SCRIB,CNIH2,KIF5A,SEPTIN5,CLMN	41
BP	GO:0060675	ureteric bud morphogenesis	11/1183	63/18800	0.00175078	0.0323671	0.0290445	FOXD1,HOXA11,HOXB7,GREM1,HOXD11,GREB1L,SMO,SIX2,LHX1,LAMA5,WT1	11
BP	GO:2000242	negative regulation of reproductive process	11/1183	63/18800	0.00175078	0.0323671	0.0290445	PAEP,TTK,TRIP13,NR5A1,FBXO5,ACVR1C,SULF1,WT1,FBXO43,ADA,OVOL1	11
BP	GO:0097485	neuron projection guidance	27/1183	235/18800	0.0018255	0.0336262	0.0301743	FOXD1,TUBB2B,SEMA3A,TUBB3,FOXG1,ARTN,EVX1,SMO,TBR1,EFNA2,SEMA5B,CDK5R2,LHX2,LAMC2,TMEFF1,DLX5,VAX1,GBX2,L1CAM,LHX1,EPHB2,LAMA5,IGSF9,LAMA1,GAP43,EPHA8,KIF5A	27
BP	GO:0021537	telencephalon development	28/1183	247/18800	0.00185587	0.0340622	0.0305656	IGF2BP1,SEMA3A,SLC2A1,KIF14,ASPM,FOXB1,WDR62,LHX5,FOXG1,SMO,TBR1,EFNA2,CDK5R2,TACC3,LHX2,EZH2,CDH2,DLX5,AVPR1A,PLCB1,LHX1,EPHB2,FBXO45,H2AX,MDK,SCN5A,SIX3,TH	28
BP	GO:0007605	sensory perception of sound	20/1183	156/18800	0.00189835	0.0347165	0.0311527	COL11A1,BIRC5,COL2A1,HOXA1,CHRNA9,OTOGL,USH1C,COCH,USH1G,OTOG,GJB6,GJB2,ESPNL,LHFPL5,ATP6V0A4,TBX1,TH,COL11A2,COL1A1,OTOF	20
BP	GO:0001505	regulation of neurotransmitter levels	25/1183	213/18800	0.00197375	0.0359661	0.032274	RAB3B,RIMS2,PAH,SNCG,PFN2,SV2A,SYT1,SYT5,SLC29A4,KCNMB4,GRM4,CHRNA5,PRKCG,SLC38A1,GAD1,GFAP,GRIK5,CPLX1,UNC13A,SCRIB,TH,SLC1A6,ASIC1,SEPTIN5,OTOF	25
BP	GO:0072171	mesonephric tubule morphogenesis	11/1183	64/18800	0.00199627	0.0362466	0.0325257	FOXD1,HOXA11,HOXB7,GREM1,HOXD11,GREB1L,SMO,SIX2,LHX1,LAMA5,WT1	11
BP	GO:0042303	molting cycle	16/1183	114/18800	0.00206062	0.0371497	0.0333361	HOXC13,GAL,EPS8L3,TERT,TRPV3,SOX21,DKK1,SMO,LRP4,LHX2,FOXE1,KRT83,CDH3,LAMA5,CD109,KRT17	16
BP	GO:0042633	hair cycle	16/1183	114/18800	0.00206062	0.0371497	0.0333361	HOXC13,GAL,EPS8L3,TERT,TRPV3,SOX21,DKK1,SMO,LRP4,LHX2,FOXE1,KRT83,CDH3,LAMA5,CD109,KRT17	16
BP	GO:0060284	regulation of cell development	48/1183	500/18800	0.00235698	0.0418213	0.0375282	FGB,DLL3,POU4F1,PAEP,SHOX2,HOXA11,HAP1,F2,SEMA3A,KIF14,AURKA,ASPM,ZNF488,E2F1,WDR62,FGA,XRCC2,FOXG1,CAMK2B,NEURL1,CLDN18,SMO,PTHLH,SEMA5B,LRP4,LHX2,PROC,EZH2,MELTF,RND2,GPR37L1,RAC3,VAX1,NKX6-1,L1CAM,PLCB1,PLAG1,CRABP2,DBN1,EPHB2,GFAP,MDK,RFLNA,LIN28A,ASCL2,TNFSF11,PRKDC,HES6	48
BP	GO:0051447	negative regulation of meiotic cell cycle	5/1183	16/18800	0.00238115	0.0418213	0.0375282	TTK,TRIP13,FBXO5,FBXO43,OVOL1	5
BP	GO:0021536	diencephalon development	12/1183	75/18800	0.00239123	0.0418213	0.0375282	POU4F1,HAP1,SEMA3A,FOXB1,PCSK1,SMO,OTX1,SOX2,PITX2,GBX2,SIX3,PITX1	12
BP	GO:0002934	desmosome organization	4/1183	10/18800	0.00241024	0.0418213	0.0375282	DSP,PKP2,DSG2,JUP	4
BP	GO:0021936	regulation of cerebellar granule cell precursor proliferation	4/1183	10/18800	0.00241024	0.0418213	0.0375282	LHX5,SMO,GPR37L1,LHX1	4
BP	GO:0035999	tetrahydrofolate interconversion	4/1183	10/18800	0.00241024	0.0418213	0.0375282	FTCD,TYMS,MTHFD2,SHMT2	4
BP	GO:0045144	meiotic sister chromatid segregation	4/1183	10/18800	0.00241024	0.0418213	0.0375282	BUB1,BUB1B,SGO1,SGO2	4
BP	GO:0051177	meiotic sister chromatid cohesion	4/1183	10/18800	0.00241024	0.0418213	0.0375282	BUB1,BUB1B,SGO1,SGO2	4
BP	GO:1901993	regulation of meiotic cell cycle phase transition	4/1183	10/18800	0.00241024	0.0418213	0.0375282	TTK,CDC25C,CDC25A,OVOL1	4
BP	GO:1905941	positive regulation of gonad development	4/1183	10/18800	0.00241024	0.0418213	0.0375282	SEMA3A,NR5A1,DHX37,WT1	4
BP	GO:2000018	regulation of male gonad development	4/1183	10/18800	0.00241024	0.0418213	0.0375282	SEMA3A,NR5A1,DHX37,WT1	4
BP	GO:0034587	piRNA metabolic process	6/1183	23/18800	0.00244656	0.0423071	0.0379641	TDRD5,TDRD12,GPAT2,HENMT1,MAEL,PIWIL2	6
BP	GO:0008652	cellular amino acid biosynthetic process	12/1183	76/18800	0.00268054	0.0461962	0.041454	PAH,PHGDH,CPS1,PSPHP1,PSAT1,PLOD2,CBS,CAD,GAD1,SHMT2,PSPH,SDS	12
CC	GO:0098687	chromosomal region	84/1232	366/19594	6.78361e-26	3.91414e-23	3.3204e-23	CENPA,SMC1B,KIF2C,AURKB,TTK,HJURP,BIRC5,NEK2,TOP2A,PLK1,CDCA5,NDC80,NCAPG,NUF2,BUB1,SKA1,CDCA8,BUB1B,ORC1,CDT1,SPAG5,RECQL4,MCM2,ZWINT,CENPF,CENPW,RAD51AP1,SGO1,ERCC6L,MAD2L1,CENPI,CENPE,SKA3,CCNB1,PIF1,CDK1,SPC25,OIP5,RAD51,DSCC1,TERT,CHEK1,MCM4,CENPM,KNL1,ESCO2,H2AC8,H2BC11,BLM,DNA2,SPC24,HELLS,EZH2,INCENP,CENPU,KIF18A,CENPO,NCAPD2,MCM7,SGO2,FEN1,MCM6,DYNC1I1,CENPN,KNTC1,CENPK,DMC1,CHEK2,MTBP,M…	84
CC	GO:0000793	condensed chromosome	65/1232	255/19594	6.35001e-23	1.83198e-20	1.55408e-20	CENPA,SMC1B,KIF2C,AURKB,TTK,HJURP,BIRC5,NEK2,TOP2A,PLK1,NDC80,NCAPG,NUF2,BUB1,SKA1,MKI67,BUB1B,CDT1,SPAG5,ZWINT,CENPF,CENPW,SGO1,ERCC6L,MAD2L1,CENPI,CENPE,SKA3,CCNB1,SPC25,RAD51,CHEK1,SYCP2,CENPM,KNL1,BRCA1,BLM,SPC24,INCENP,CENPU,KIF18A,CENPO,NCAPD2,SGO2,P3H4,DYNC1I1,CENPN,KNTC1,PSMC3IP,CENPK,DMC1,MTBP,MEI4,TUBG1,CDX2,SUV39H1,H2AX,SPDL1,CDK2,HSPA2,TOPBP1,CENPH,KNSTRN,FANCD2,NCAPD3	65
CC	GO:0000775	chromosome, centromeric region	60/1232	227/19594	4.01592e-22	7.72396e-20	6.5523e-20	CENPA,SMC1B,KIF2C,AURKB,TTK,HJURP,BIRC5,NEK2,TOP2A,PLK1,CDCA5,NDC80,NCAPG,NUF2,BUB1,SKA1,CDCA8,BUB1B,CDT1,SPAG5,ZWINT,CENPF,CENPW,SGO1,ERCC6L,MAD2L1,CENPI,CENPE,SKA3,CCNB1,SPC25,OIP5,DSCC1,CENPM,KNL1,ESCO2,H2AC8,H2BC11,SPC24,HELLS,EZH2,INCENP,CENPU,KIF18A,CENPO,NCAPD2,SGO2,DYNC1I1,CENPN,KNTC1,CENPK,MTBP,SUV39H1,SPDL1,CENPH,DNMT3A,KNSTRN,MIS18A,SUV39H2,NCAPD3	60
CC	GO:0000779	condensed chromosome, centromeric region	45/1232	156/19594	1.56725e-18	2.26075e-16	1.91782e-16	CENPA,KIF2C,AURKB,TTK,HJURP,BIRC5,NEK2,PLK1,NDC80,NCAPG,NUF2,BUB1,SKA1,BUB1B,CDT1,SPAG5,ZWINT,CENPF,CENPW,SGO1,ERCC6L,MAD2L1,CENPI,CENPE,SKA3,CCNB1,SPC25,CENPM,KNL1,SPC24,INCENP,CENPU,KIF18A,CENPO,NCAPD2,SGO2,DYNC1I1,CENPN,KNTC1,CENPK,MTBP,SPDL1,CENPH,KNSTRN,NCAPD3	45
CC	GO:0000776	kinetochore	42/1232	146/19594	2.44468e-17	2.82116e-15	2.39322e-15	CENPA,KIF2C,AURKB,TTK,HJURP,BIRC5,NEK2,PLK1,NDC80,NUF2,BUB1,SKA1,BUB1B,CDT1,SPAG5,ZWINT,CENPF,CENPW,SGO1,ERCC6L,MAD2L1,CENPI,CENPE,SKA3,CCNB1,SPC25,CENPM,KNL1,SPC24,INCENP,CENPU,KIF18A,CENPO,SGO2,DYNC1I1,CENPN,KNTC1,CENPK,MTBP,SPDL1,CENPH,KNSTRN	42
CC	GO:0000228	nuclear chromosome	49/1232	228/19594	2.02198e-14	1.94447e-12	1.64951e-12	HMGA2,SMC1B,BIRC5,CDC45,MCM10,NEK2,TOP2A,PLK1,ORC1,GINS1,MCM2,GINS4,ORC6,RAD51,GINS2,CHEK1,SYCP2,MCM4,TIMELESS,WDHD1,TONSL,BRCA1,BLM,POLE2,INCENP,NCAPD2,MCM7,P3H4,PRIM1,MCM6,PSMC3IP,DMC1,H3C8,GINS3,MEI4,POLE,TUBG1,CDX2,MCM3,SUV39H1,H3C4,PCNA,H2AX,HSPA2,TOPBP1,ACTL6A,H3C6,SINHCAF,MCM5	49
CC	GO:0071162	CMG complex	11/1232	11/19594	5.8229e-14	4.79973e-12	4.07165e-12	CDC45,GINS1,MCM2,GINS4,GINS2,MCM4,MCM7,MCM6,GINS3,MCM3,MCM5	11
CC	GO:0005819	spindle	67/1232	402/19594	1.89604e-13	1.36752e-11	1.16008e-11	KIF18B,KIF4A,TPX2,ESPL1,KIF2C,CDC20,AURKB,TTK,KIFC1,BIRC5,NEK2,DLGAP5,FAM83D,CDC6,PLK1,CKAP2L,KIF23,AUNIP,SKA1,CDCA8,KIF14,BUB1B,SNCG,AURKA,ASPM,SPAG5,CENPF,SGO1,PRC1,MAD2L1,KIF15,KIF11,CENPE,WDR62,SKA3,CCNB1,CDK1,KIF20A,RACGAP1,HMMR,PSRC1,HASPIN,SHCBP1,NUSAP1,PLK4,ECT2,TACC3,PLEKHG6,INCENP,POC1A,KIF18A,DYNC1I1,CDC7,FBXO5,KNTC1,DDX11,KIF20B,TUBG1,MICAL3,SPDL1,HSPA2,TOPBP1,CLTCL1,KNSTRN,MTCL1,VRK1…	67
CC	GO:0031261	DNA replication preinitiation complex	11/1232	12/19594	6.58812e-13	4.22372e-11	3.58301e-11	CDC45,GINS1,MCM2,GINS4,GINS2,MCM4,MCM7,MCM6,GINS3,MCM3,MCM5	11
CC	GO:0000922	spindle pole	35/1232	169/19594	3.14194e-10	1.8129e-08	1.5379e-08	TPX2,CDC20,AURKB,NEK2,DLGAP5,FAM83D,CDC6,PLK1,CKAP2L,AUNIP,AURKA,ASPM,SPAG5,CENPF,SGO1,PRC1,MAD2L1,KIF11,WDR62,CCNB1,PSRC1,PLK4,TACC3,PLEKHG6,POC1A,DYNC1I1,KNTC1,DDX11,KIF20B,TUBG1,SPDL1,TOPBP1,KNSTRN,MTCL1,CKAP2	35
CC	GO:0032993	protein-DNA complex	37/1232	220/19594	3.85284e-08	2.02099e-06	1.71442e-06	HMGA2,CENPA,CDC45,HOXA11,GINS1,MCM2,GINS4,GINS2,TERT,MCM4,H2AC8,H2BC11,H2BC8,MCM7,RAG1,H2BC9,PRIM1,H2AW,MCM6,H3C8,GINS3,H2AC11,H2AC7,H2BC17,MCM3,H3C4,PCNA,H2AX,ACTL6A,H3C6,H2BC7,H2AC13,JUP,H1-3,MCM5,PRKDC,H2BU1	37
CC	GO:0005874	microtubule	58/1232	435/19594	4.68635e-08	2.25336e-06	1.91154e-06	KIF1A,KIF18B,KIF4A,TPX2,TUBB2B,KIF2C,AURKB,TUBB4A,KIFC1,BIRC5,NEK2,PLK1,KIF23,GTSE1,SKA1,KIF14,KIF3C,AURKA,ASPM,SPAG5,TUBB3,PRC1,KIF15,KIF11,CENPE,SKA3,CDK1,KIF20A,RACGAP1,KLC3,STMN1,PSRC1,NUSAP1,TUBAL3,MAP6D1,FSD1,INCENP,KIF18A,TUBA1C,DYNC1I1,TUBA1B,KNTC1,PTPN20,KIF20B,TUBG1,REEP2,TUBB,DNM1,CCT5,SCTR,GAS2L3,FKBP4,KNSTRN,KIF24,KIF5A,CKAP2,CCT6A,FIGN	58
CC	GO:0072686	mitotic spindle	30/1232	160/19594	6.23501e-08	2.76738e-06	2.34759e-06	KIF18B,TPX2,ESPL1,AURKB,KIFC1,FAM83D,CDC6,PLK1,CKAP2L,KIF23,SKA1,AURKA,ASPM,SPAG5,PRC1,MAD2L1,KIF11,CENPE,WDR62,SKA3,CDK1,RACGAP1,NUSAP1,ECT2,TACC3,KIF18A,CDC7,KIF20B,TUBG1,KNSTRN	30
CC	GO:0000940	outer kinetochore	8/1232	12/19594	9.42017e-08	3.85622e-06	3.27127e-06	PLK1,NDC80,SKA1,BUB1B,CENPF,SKA3,CCNB1,SPDL1	8
CC	GO:0000794	condensed nuclear chromosome	19/1232	74/19594	1.00248e-07	3.85622e-06	3.27127e-06	SMC1B,NEK2,PLK1,RAD51,CHEK1,SYCP2,BRCA1,BLM,INCENP,P3H4,PSMC3IP,DMC1,MEI4,TUBG1,CDX2,SUV39H1,H2AX,HSPA2,TOPBP1	19
CC	GO:0051233	spindle midzone	13/1232	36/19594	1.33464e-07	4.81306e-06	4.08296e-06	KIF18B,AURKB,CDC6,PLK1,CDCA8,KIF14,AURKA,PRC1,CENPE,RACGAP1,INCENP,KIF18A,KIF20B	13
CC	GO:0005657	replication fork	16/1232	60/19594	5.81718e-07	1.97442e-05	1.67491e-05	MCM10,UHRF1,PIF1,XRCC2,CHEK1,TIMELESS,WDHD1,TONSL,RFC4,BLM,PRIM1,MCM3,PCNA,RFC5,H2AX,RFC3	16
CC	GO:0005871	kinesin complex	14/1232	49/19594	1.18283e-06	3.79161e-05	3.21645e-05	KIF1A,KIF18B,KIF2C,KIFC1,KIF23,KIF14,KIF3C,KIF15,KIF11,KIF20A,KLC3,KIF18A,KIF20B,KIF5A	14
CC	GO:0044815	DNA packaging complex	31/1232	198/19594	2.328e-06	7.06977e-05	5.99734e-05	CENPA,SMC1B,NCAPH,NDC80,NCAPG,NUF2,SPC25,TERT,H2AC8,H2BC11,SPC24,H2BC8,NCAPG2,NCAPD2,SGO2,H2BC9,H2AW,DPF1,H3C8,H2AC11,H2AC7,H2BC17,H3C4,H2AX,ACTL6A,H3C6,H2BC7,H2AC13,H1-3,H2BU1,NCAPD3	31
CC	GO:0000792	heterochromatin	16/1232	69/19594	4.34972e-06	0.000125489	0.000106454	HMGA2,CENPA,HMGA1,EME1,UHRF1,ESCO2,HELLS,EZH2,INCENP,CDKN2A,SALL4,CBX2,SUV39H1,DNMT3A,WDR76,NCAPD3	16
CC	GO:0000800	lateral element	7/1232	13/19594	4.68454e-06	0.000128713	0.000109188	SMC1B,RAD51,SYCP2,BRCA1,BLM,INCENP,MEI4	7
CC	GO:0010369	chromocenter	7/1232	15/19594	1.57076e-05	0.000411967	0.000349475	AURKB,CDCA8,OIP5,ESCO2,INCENP,PIWIL2,SOX30	7
CC	GO:0000307	cyclin-dependent protein kinase holoenzyme complex	12/1232	49/19594	3.7971e-05	0.000952576	0.000808078	CCNE1,CCNA2,CCNB2,CCNB1,CDK1,CKS1B,CCNP,CCNF,CCNE2,PCNA,CDK2,CDK4	12
CC	GO:0000781	chromosome, telomeric region	25/1232	166/19594	4.19476e-05	0.00100849	0.000855511	ORC1,RECQL4,MCM2,RAD51AP1,PIF1,CDK1,RAD51,TERT,CHEK1,MCM4,BLM,DNA2,EZH2,MCM7,FEN1,MCM6,DMC1,CHEK2,MCM3,PCNA,H2AX,CDK2,MCM5,PRKDC,ALYREF	25
CC	GO:0005876	spindle microtubule	16/1232	83/19594	5.11478e-05	0.00118049	0.00100142	KIF18B,KIF4A,AURKB,BIRC5,PLK1,SKA1,AURKA,PRC1,KIF11,CENPE,SKA3,CDK1,PSRC1,KIF18A,KNTC1,TUBG1	16
CC	GO:0030496	midbody	28/1232	203/19594	7.50179e-05	0.00166482	0.00141228	KIF4A,AURKB,BIRC5,NEK2,PLK1,KIF23,SLC2A1,ANLN,CDCA8,KIF14,CEP55,AURKA,ASPM,SPAG5,CENPF,PRC1,CENPE,CDK1,KIF20A,RACGAP1,PSRC1,SHCBP1,ECT2,INCENP,DDX11,KIF20B,MICAL3,MTCL1	28
CC	GO:0001741	XY body	6/1232	14/19594	0.000118233	0.00243645	0.00206686	DMRTC2,PLK4,ESCO2,MAEL,H2AX,DNMT3A	6
CC	GO:1990023	mitotic spindle midzone	6/1232	14/19594	0.000118233	0.00243645	0.00206686	KIF18B,AURKB,PRC1,CENPE,KIF18A,KIF20B	6
CC	GO:0000795	synaptonemal complex	10/1232	41/19594	0.000173562	0.00333818	0.0028318	SMC1B,PLK1,RAD51,SYCP2,BRCA1,BLM,INCENP,P3H4,MEI4,HSPA2	10
CC	GO:0099086	synaptonemal structure	10/1232	41/19594	0.000173562	0.00333818	0.0028318	SMC1B,PLK1,RAD51,SYCP2,BRCA1,BLM,INCENP,P3H4,MEI4,HSPA2	10
CC	GO:0005581	collagen trimer	15/1232	86/19594	0.00027872	0.00518779	0.00440084	SFTPA1,COL11A1,SFTPA2,COL2A1,C1QL1,C1QL4,COL7A1,SFTPD,CTHRC1,C1QTNF6,COL12A1,COL22A1,COL9A3,COL11A2,COL1A1	15
CC	GO:0030057	desmosome	7/1232	25/19594	0.000672902	0.0121333	0.0102927	DSG1,DSP,PKP2,DSC3,DSC2,DSG2,JUP	7
CC	GO:0014704	intercalated disc	10/1232	49/19594	0.000804502	0.0138247	0.0117276	SLC2A1,DSP,PKP2,CDH2,DSC2,DSG2,SCN5A,SCN1A,JUP,ACTN1	10
CC	GO:0045120	pronucleus	5/1232	13/19594	0.000819406	0.0138247	0.0117276	SLC2A1,AURKA,CCNA2,CENPF,EZH2	5
CC	GO:1902911	protein kinase complex	17/1232	115/19594	0.000838584	0.0138247	0.0117276	CCNE1,CCNA2,CCNB2,CCNB1,CDK1,CDK5R2,CKS1B,CCNP,PRKAA2,CCNF,ACVR1C,CCNE2,PCNA,CDK2,CDK4,IRS1,PRKDC	17
CC	GO:0005875	microtubule associated complex	21/1232	160/19594	0.00109028	0.0174748	0.014824	KIF1A,KIF18B,KIF2C,AURKB,KIFC1,BIRC5,KIF23,CDCA8,KIF14,KIF3C,AURKA,KIF15,KIF11,KIF20A,KLC3,INCENP,KIF18A,DYNC1I1,KIF20B,ACTL8,KIF5A	21
CC	GO:0000786	nucleosome	18/1232	129/19594	0.00119037	0.0183569	0.0155723	CENPA,H2AC8,H2BC11,H2BC8,H2BC9,H2AW,H3C8,H2AC11,H2AC7,H2BC17,H3C4,H2AX,ACTL6A,H3C6,H2BC7,H2AC13,H1-3,H2BU1	18
CC	GO:0072687	meiotic spindle	5/1232	14/19594	0.00120895	0.0183569	0.0155723	AURKA,ASPM,INCENP,FBXO5,HSPA2	5
CC	GO:1902554	serine/threonine protein kinase complex	15/1232	99/19594	0.00128376	0.018993	0.016112	CCNE1,CCNA2,CCNB2,CCNB1,CDK1,CDK5R2,CKS1B,CCNP,CCNF,ACVR1C,CCNE2,PCNA,CDK2,CDK4,PRKDC	15
CC	GO:0043596	nuclear replication fork	7/1232	28/19594	0.00140443	0.0202588	0.0171857	MCM10,TIMELESS,WDHD1,TONSL,PRIM1,MCM3,PCNA	7
CC	GO:0044291	cell-cell contact zone	12/1232	71/19594	0.00146789	0.0206578	0.0175242	SLC2A1,DSP,PKP2,CDH2,BAIAP2L2,DSC2,DSG2,SCN5A,SCRIB,SCN1A,JUP,ACTN1	12
CC	GO:0150034	distal axon	30/1232	270/19594	0.00176858	0.024297	0.0206113	IGF2BP1,HAP1,SNCG,PTPRN,NTS,TUBB3,PACSIN1,PCSK1,NMU,CDK5R2,NGEF,CBARP,TULP1,CALCA,RAC3,PRKCG,CAD,FSCN1,L1CAM,DBN1,GPRIN1,KIF20B,GAD1,GRIK5,CPLX1,UNC13A,GAP43,TH,FKBP4,PCDHGB1	30
CC	GO:0016324	apical plasma membrane	37/1232	358/19594	0.00206094	0.0276549	0.0234599	SLC5A12,SLC15A1,TF,SLC2A1,NPC1L1,DSG1,ASPM,PTPRH,RHCG,SLC29A4,SAPCD2,ABCC2,MUC13,SLC7A5,ANXA13,SLC16A1,SLC7A9,CD300LG,CDH2,OTOG,GJB6,UPK2,UPK1A,CDHR2,SLC38A1,LHFPL5,ATP6V0A4,CEACAM5,SLC26A9,SLC38A3,MTCL1,SLC16A8,SLC2A5,UPK1B,SLC5A6,VANGL2,ATP12A	37
CC	GO:0000803	sex chromosome	7/1232	30/19594	0.00216291	0.0283636	0.0240611	DMRTC2,PLK4,ESCO2,MAEL,H2AX,CDK2,DNMT3A	7
CC	GO:0005916	fascia adherens	4/1232	10/19594	0.00240367	0.0305768	0.0259385	DSP,CDH2,JUP,ACTN1	4
CC	GO:0005721	pericentric heterochromatin	6/1232	23/19594	0.00243766	0.0305768	0.0259385	CENPA,ESCO2,HELLS,EZH2,INCENP,NCAPD3	6
CC	GO:0016342	catenin complex	7/1232	31/19594	0.00264433	0.0324634	0.027539	CDH18,CDH24,CDH17,CDH3,CDH2,CDH7,JUP	7
CC	GO:0099060	integral component of postsynaptic specialization membrane	12/1232	77/19594	0.00298119	0.0351355	0.0298057	GABRA3,GRIN2D,CHRNA9,NLGN4Y,GABRG2,NETO1,KCND2,CDH2,CACNG4,GRIK5,LRFN4,CNIH2	12
CC	GO:0044306	neuron projection terminus	17/1232	129/19594	0.00298378	0.0351355	0.0298057	SNCG,PTPRN,UCHL1,SYT1,NTS,PACSIN1,PCSK1,NMU,TULP1,CALCA,PRKCG,CAD,GAD1,GRIK5,CPLX1,UNC13A,TH	17
CC	GO:0042599	lamellar body	5/1232	17/19594	0.00319008	0.0368136	0.0312292	SFTPA1,SFTPC,SFTPA2,SFTPB,NAPSA	5
CC	GO:0043186	P granule	6/1232	25/19594	0.00383952	0.0418001	0.0354593	DDX3Y,TDRD5,PIWIL3,HENMT1,MAEL,PIWIL2	6
CC	GO:0045495	pole plasm	6/1232	25/19594	0.00383952	0.0418001	0.0354593	DDX3Y,TDRD5,PIWIL3,HENMT1,MAEL,PIWIL2	6
CC	GO:0060293	germ plasm	6/1232	25/19594	0.00383952	0.0418001	0.0354593	DDX3Y,TDRD5,PIWIL3,HENMT1,MAEL,PIWIL2	6
CC	GO:0098948	intrinsic component of postsynaptic specialization membrane	12/1232	80/19594	0.0041129	0.0439471	0.0372807	GABRA3,GRIN2D,CHRNA9,NLGN4Y,GABRG2,NETO1,KCND2,CDH2,CACNG4,GRIK5,LRFN4,CNIH2	12
CC	GO:0005788	endoplasmic reticulum lumen	32/1232	311/19594	0.00424701	0.044555	0.0377964	CHGB,COL11A1,TF,COL2A1,F2,TMEM132A,FGA,COL7A1,FKBP10,STC2,GIP,F7,AHSG,PROC,MELTF,CDH2,PDIA2,SCG3,VGF,IGFBP3,F5,VCAN,COL12A1,ADAMTS7,COL22A1,IL23A,CERCAM,COL9A3,COL11A2,ERO1A,COL1A1,PDIA6	32
CC	GO:0043679	axon terminus	15/1232	113/19594	0.0047625	0.0490707	0.0416271	SNCG,PTPRN,NTS,PACSIN1,PCSK1,NMU,TULP1,CALCA,PRKCG,CAD,GAD1,GRIK5,CPLX1,UNC13A,TH	15
MF	GO:0017116	single-stranded DNA helicase activity	16/1199	23/18410	1.51059e-14	1.33234e-11	1.27685e-11	POLQ,MCM2,PIF1,RAD51,DSCC1,MCM4,RFC4,DNA2,MCM8,MCM7,MCM6,CHTF18,MCM3,RFC5,RFC3,MCM5	16
MF	GO:0003678	DNA helicase activity	25/1199	72/18410	1.36039e-12	4.38756e-10	4.20481e-10	RAD54L,POLQ,RECQL4,MCM2,ERCC6L,PIF1,RAD51,DSCC1,MCM4,RFC4,BRIP1,BLM,DNA2,DDX12P,MCM8,MCM7,MCM6,CHTF18,DDX11,RAD54B,MCM3,DQX1,RFC5,RFC3,MCM5	25
MF	GO:0008094	ATP-dependent activity, acting on DNA	30/1199	103/18410	1.49237e-12	4.38756e-10	4.20481e-10	RAD54L,TOP2A,POLQ,RECQL4,MCM2,ERCC6L,PIF1,XRCC2,RAD51,DSCC1,MCM4,RFC4,BRIP1,BLM,DNA2,DDX12P,MCM8,MCM7,MCM6,CHTF18,DMC1,DDX11,RAD54B,MCM3,DQX1,ATAD5,RFC5,RFC3,MCM5,HLTF	30
MF	GO:0140097	catalytic activity, acting on DNA	43/1199	222/18410	9.16982e-11	2.02194e-08	1.93773e-08	HMGA2,RAD54L,TOP2A,EXO1,POLQ,RECQL4,MCM2,ERCC6L,DNMT3B,PIF1,XRCC2,RAD51,DSCC1,TERT,MCM4,NEIL3,RFC4,BRIP1,BLM,DNA2,POLE2,DDX12P,MCM8,MCM7,RAG1,FEN1,MCM6,CHTF18,UNG,DMC1,DDX11,POLE,RAD54B,MCM3,DQX1,ATAD5,PCNA,RFC5,RFC3,DNMT3A,TDG,MCM5,HLTF	43
MF	GO:0008017	microtubule binding	45/1199	272/18410	6.58239e-09	1.16113e-06	1.11277e-06	KIF1A,KIF18B,KIF4A,TPX2,KIF2C,KIFC1,BIRC5,DLGAP5,FAM83D,PLK1,KIF23,GTSE1,SKA1,KIF14,KIF3C,SPAG5,CENPF,FTCD,PRC1,KIF15,KIF11,CENPE,KIF20A,RACGAP1,KLC3,PSRC1,NUSAP1,DIAPH3,NEFH,MAP6D1,SPC24,FSD1,KIF18A,MAST1,DYNC1I1,GJB6,KIF20B,REEP2,GAPDH,DNM1,GAS2L3,KNSTRN,KIF24,MTCL1,KIF5A	45
MF	GO:0004386	helicase activity	31/1199	155/18410	1.73185e-08	2.54582e-06	2.43978e-06	RAD54L,DDX3Y,POLQ,RECQL4,MCM2,TDRD12,ERCC6L,PIF1,RAD51,DSCC1,MCM4,RFC4,BRIP1,BLM,DNA2,HELLS,DDX12P,MCM8,MCM7,MCM6,DDX53,CHTF18,DDX11,RAD54B,MCM3,DQX1,RFC5,DHX37,RFC3,MCM5,HLTF	31
MF	GO:0016887	ATP hydrolysis activity	48/1199	325/18410	8.34074e-08	1.05093e-05	1.00716e-05	KIF1A,KIF18B,SMC1B,KIF2C,KIFC1,RAD54L,DDX3Y,KIF23,KIF14,PFN2,KIF3C,ORC1,TRIP13,RECQL4,MCM2,TDRD12,ERCC6L,KIF15,PIF1,KIF20A,MCM4,RFC4,BRIP1,BLM,ATAD2,DNA2,KIF18A,DDX12P,MCM8,MCM7,MCM6,DDX53,CHTF18,DDX11,HSP90AB3P,KIF20B,MCM3,DQX1,ATAD5,HSP90AA2P,RFC5,DHX37,HSPA2,CCT5,MCM5,KIF5A,CCT6A,FIGN	48
MF	GO:0003777	microtubule motor activity	17/1199	67/18410	9.15776e-07	0.000100964	9.6759e-05	KIF1A,KIF18B,KIF4A,KIF2C,KIFC1,KIF23,KIF14,KIF3C,KIF15,KIF11,CENPE,KIF20A,KIF18A,DYNC1I1,KIF20B,KIF24,KIF5A	17
MF	GO:0035173	histone kinase activity	8/1199	16/18410	2.54028e-06	0.000248947	0.000238578	AURKB,AURKA,CDK1,CHEK1,HASPIN,PRKAA2,CDK2,VRK1	8
MF	GO:0008574	plus-end-directed microtubule motor activity	8/1199	17/18410	4.52389e-06	0.000399007	0.000382388	KIF1A,KIF18B,KIF14,KIF11,CENPE,KIF18A,KIF20B,KIF5A	8
MF	GO:0015631	tubulin binding	48/1199	376/18410	5.99398e-06	0.000480609	0.00046059	KIF1A,KIF18B,KIF4A,TPX2,KIF2C,KIFC1,BIRC5,DLGAP5,FAM83D,PLK1,KIF23,GTSE1,SKA1,KIF14,KIF3C,SPAG5,CENPF,FTCD,PRC1,KIF15,KIF11,CENPE,KIF20A,RACGAP1,KLC3,STMN1,PSRC1,NUSAP1,BRCA1,DIAPH3,NEFH,MAP6D1,SPC24,FSD1,KIF18A,MAST1,DYNC1I1,GJB6,KIF20B,REEP2,GAPDH,DNM1,CCT5,GAS2L3,KNSTRN,KIF24,MTCL1,KIF5A	48
MF	GO:0003688	DNA replication origin binding	7/1199	16/18410	3.31499e-05	0.00243651	0.00233503	CDC45,MCM10,CDC6,ORC1,MCM2,DDX11,MCM5	7
MF	GO:0003774	cytoskeletal motor activity	19/1199	111/18410	9.41999e-05	0.0063911	0.0061249	KIF1A,KIF18B,KIF4A,MYO18B,KIF2C,KIFC1,KIF23,KIF14,KIF3C,KIF15,KIF11,CENPE,KIF20A,KIF18A,DYNC1I1,KIF20B,MYH6,KIF24,KIF5A	19
MF	GO:0005179	hormone activity	20/1199	122/18410	0.000115912	0.00730245	0.00699829	CHGB,GAL,NTS,RETNLB,STC2,GIP,C1QTNF12,PTHLH,UCN2,CGA,LEP,ADM,SPX,SST,CALCA,VGF,THPO,INSL4,INHA,IGF2	20
MF	GO:0004252	serine-type endopeptidase activity	25/1199	174/18410	0.000158844	0.00934002	0.00895099	CTSV,KLK8,KLK6,F2,TMPRSS11E,MMP12,PCSK1,PRSS21,MMP1,F7,F11,PRSS3,PROC,KLK2,MMP11,PLAU,HP,MMP14,KLK14,PCSK2,TLL2,PRSS45P,ST14,MMP3,GZMB	25
MF	GO:0003697	single-stranded DNA binding	19/1199	120/18410	0.000270372	0.0149043	0.0142835	POU4F1,CDC45,MCM10,RAD54L,RECQL4,MCM2,HROB,RAD51AP1,RAD51,MCM4,NEIL3,BLM,MCM8,MCM7,MCM6,DMC1,DDX11,MCM3,MCM5	19
MF	GO:0016538	cyclin-dependent protein serine/threonine kinase regulator activity	11/1199	50/18410	0.000302404	0.0156894	0.0150359	CCNE1,CCNA2,CCNB2,CCNB1,CDK5R2,CKS1B,CCNP,CDKN2A,CCNF,CCNE2,CDK4	11
MF	GO:0086080	protein binding involved in heterotypic cell-cell adhesion	5/1199	12/18410	0.000625238	0.0306367	0.0293606	DSP,PKP2,DSC2,DSG2,JUP	5
MF	GO:0008236	serine-type peptidase activity	25/1199	191/18410	0.00066973	0.0310896	0.0297946	CTSV,KLK8,KLK6,F2,TMPRSS11E,MMP12,PCSK1,PRSS21,MMP1,F7,F11,PRSS3,PROC,KLK2,MMP11,PLAU,HP,MMP14,KLK14,PCSK2,TLL2,PRSS45P,ST14,MMP3,GZMB	25
MF	GO:0017171	serine hydrolase activity	25/1199	195/18410	0.000908028	0.040044	0.0383761	CTSV,KLK8,KLK6,F2,TMPRSS11E,MMP12,PCSK1,PRSS21,MMP1,F7,F11,PRSS3,PROC,KLK2,MMP11,PLAU,HP,MMP14,KLK14,PCSK2,TLL2,PRSS45P,ST14,MMP3,GZMB	25
MF	GO:0005326	neurotransmitter transmembrane transporter activity	6/1199	19/18410	0.000978786	0.041109	0.0393968	SLC6A15,GABRQ,SLC28A2,SLC29A4,CPLX1,SLC17A7	6
MF	GO:0015293	symporter activity	20/1199	144/18410	0.00106694	0.0427745	0.0409929	SLC5A12,SLC15A1,SLC5A5,SLC6A17,SLC6A15,SLC28A2,SLC6A8,SLC16A1,MFSD2B,SLC38A1,SLC24A2,SLC45A1,SLC5A11,SLC17A7,SLC28A1,SLC2A10,SLC1A6,SLC38A3,SLC16A8,SLC5A6	20

## Sheet: Table S5
Table S5 KEGG enrichment analyses of cluster-specific genes.
ID	Description	GeneRatio	BgRatio	pvalue	p.adjust	qvalue	geneID	Count
hsa04110	Cell cycle	40/529	126/8163	4.56639e-18	1.43841e-15	1.3555e-15	ESPL1,SMC1B,CDC20,TTK,CDC45,CCNE1,CDC6,PLK1,BUB1,PKMYT1,CDC25C,BUB1B,ORC1,CCNA2,MCM2,CCNB2,E2F1,CDC25A,MAD2L1,CCNB1,CDK1,E2F2,ORC6,CHEK1,MCM4,MCM7,CDKN2A,MCM6,PTTG1,CDC7,CCNE2,SKP2,CHEK2,MCM3,PCNA,CDK2,DBF4,CDK4,MCM5,PRKDC	40
hsa03030	DNA replication	16/529	36/8163	1.68392e-10	2.65217e-08	2.49928e-08	MCM2,MCM4,RFC4,DNA2,POLE2,MCM7,FEN1,PRIM1,MCM6,POLE,MCM3,RNASEH2A,PCNA,RFC5,RFC3,MCM5	16
hsa03460	Fanconi anemia pathway	13/529	54/8163	2.89472e-05	0.00243688	0.00229641	EME1,RAD51,UBE2T,FANCB,BRIP1,BRCA1,FANCI,BLM,FANCA,FAAP24,RMI2,FANCG,FANCD2	13
hsa04114	Oocyte meiosis	22/529	131/8163	3.09445e-05	0.00243688	0.00229641	ESPL1,SMC1B,CDC20,CCNE1,PLK1,BUB1,PKMYT1,CDC25C,AURKA,CCNB2,SGO1,MAD2L1,CCNB1,CDK1,CALML5,SPDYC,CAMK2B,PTTG1,FBXO5,CCNE2,CDK2,FBXO43	22
hsa04115	p53 signaling pathway	15/529	73/8163	5.33784e-05	0.00336284	0.00316899	CCNE1,SERPINB5,GTSE1,RRM2,CCNB2,CCNB1,CDK1,CHEK1,CDKN2A,CCNE2,CHEK2,IGFBP3,PMAIP1,CDK2,CDK4	15
hsa04080	Neuroactive ligand-receptor interaction	40/529	362/8163	0.000575059	0.0301906	0.0284503	GABRA3,HTR2C,GRIN2D,GAL,LYPD6,F2,NPW,NPFFR2,GABRQ,CHRNA9,HTR1D,NTS,GPR156,NMU,GPR35,GABRG2,PRLR,GIP,GABRR1,UCN2,PTH2R,CGA,PRSS3,LEP,ADM,SPX,GRM4,SST,CHRNA5,CALCA,VGF,TAC3,AVPR1A,CALCR,GRIK5,SSTR2,KISS1R,SCTR,LYPD6B,BDKRB1	40
hsa01230	Biosynthesis of amino acids	13/529	75/8163	0.000944065	0.0374429	0.0352845	PAH,PHGDH,CPS1,PSAT1,MAT1A,CBS,TKTL1,GAPDH,PFKP,GPT2,SHMT2,PSPH,SDS	13
hsa03440	Homologous recombination	9/529	41/8163	0.00101658	0.0374429	0.0352845	RAD54L,EME1,XRCC2,RAD51,BRIP1,BRCA1,BLM,RAD54B,TOPBP1	9
hsa04218	Cellular senescence	21/529	156/8163	0.0010698	0.0374429	0.0352845	MYBL2,FOXM1,CCNE1,CCNA2,CCNB2,E2F1,CDC25A,CCNB1,CDK1,E2F2,CALML5,CHEK1,EIF4EBP1,CDKN2A,CCNE2,CHEK2,IGFBP3,CXCL8,CDK2,KIR2DL4,CDK4	21
hsa00270	Cysteine and methionine metabolism	10/529	51/8163	0.00136924	0.0431312	0.0406449	PHGDH,DNMT3B,PSAT1,GCLC,MAT1A,CBS,DNMT3A,LDHB,LDHC,SDS	10

## Sheet: Table S6
Table S6 GSVA result of two m6A/m5C-related clusters
logFC	AveExpr	t	P.Value	adj.P.Val	B	ENSEMBL
-0.0313514	0.471045	-8.97699	1.01454e-17	6.29015e-16	28.2289	KEGG_DNA_REPLICATION
0.0244501	0.350345	5.38411	1.22844e-07	1.14245e-06	5.4	KEGG_ASTHMA
-0.022912	0.461499	-8.26519	1.95604e-15	9.09558e-14	23.0243	KEGG_MISMATCH_REPAIR
-0.0225901	0.482053	-10.0481	2.20646e-21	4.10401e-19	36.5894	KEGG_CELL_CYCLE
-0.0201961	0.401901	-8.0379	9.85934e-15	3.66767e-13	21.4267	KEGG_HOMOLOGOUS_RECOMBINATION
0.0200543	0.367047	4.80622	2.16217e-06	1.21868e-05	2.62558	KEGG_INTESTINAL_IMMUNE_NETWORK_FOR_IGA_PRODUCTION
0.0174962	0.350686	4.95299	1.07031e-06	7.37322e-06	3.30385	KEGG_HEMATOPOIETIC_CELL_LINEAGE
-0.0174808	0.460065	-7.34053	1.15331e-12	3.0645e-11	16.7315	KEGG_BASE_EXCISION_REPAIR
0.0169494	-0.223962	5.92479	6.63041e-09	8.22171e-08	8.24165	KEGG_OLFACTORY_TRANSDUCTION
0.0166303	0.158374	4.61608	5.23921e-06	2.70693e-05	1.77401	KEGG_LINOLEIC_ACID_METABOLISM
0.0165595	0.261893	4.88585	1.47962e-06	9.25952e-06	2.9913	KEGG_ALPHA_LINOLENIC_ACID_METABOLISM
0.0156717	0.266881	4.81694	2.05519e-06	1.21868e-05	2.67448	KEGG_AUTOIMMUNE_THYROID_DISEASE
0.0156583	0.430784	3.67494	0.000269488	0.000928238	-1.97663	KEGG_ALLOGRAFT_REJECTION
0.0147215	0.447295	6.66172	8.73357e-11	1.80494e-09	12.4786	KEGG_GLYCOSPHINGOLIPID_BIOSYNTHESIS_GANGLIO_SERIES
0.0141215	0.282755	4.80962	2.1277e-06	1.21868e-05	2.64106	KEGG_ARACHIDONIC_ACID_METABOLISM
0.0138358	0.450365	5.86549	9.23241e-09	9.54016e-08	7.91869	KEGG_FATTY_ACID_METABOLISM
-0.0137972	0.444774	-6.52039	2.06543e-10	3.84171e-09	11.6345	KEGG_ONE_CARBON_POOL_BY_FOLATE
0.0135739	0.31079	3.47783	0.00055959	0.00182603	-2.66169	KEGG_TAURINE_AND_HYPOTAURINE_METABOLISM
0.012964	0.283009	4.99467	8.73804e-07	6.25106e-06	3.49977	KEGG_PRIMARY_BILE_ACID_BIOSYNTHESIS
0.0127133	0.325609	3.7239	0.000223614	0.000831843	-1.80101	KEGG_RENIN_ANGIOTENSIN_SYSTEM
-0.0125928	0.54882	-5.21991	2.85064e-07	2.41009e-06	4.58359	KEGG_PROTEASOME
-0.0120223	0.433041	-9.6455	5.6247e-20	5.23097e-18	33.3768	KEGG_OOCYTE_MEIOSIS
0.0118531	0.348994	5.90132	7.56111e-09	8.48576e-08	8.11349	KEGG_ABC_TRANSPORTERS
0.0115004	0.391405	5.97427	5.02009e-09	6.91671e-08	8.5132	KEGG_ALDOSTERONE_REGULATED_SODIUM_REABSORPTION
0.0110531	0.486715	4.311	2.03764e-05	9.02383e-05	0.4727	KEGG_VIRAL_MYOCARDITIS
-0.0105009	0.454426	-5.65906	2.8626e-08	2.80234e-07	6.81604	KEGG_PYRIMIDINE_METABOLISM
0.0104918	0.386194	3.12691	0.00189241	0.00510128	-3.79283	KEGG_COMPLEMENT_AND_COAGULATION_CASCADES
0.0104704	0.321671	3.70023	0.000244786	0.000892426	-1.88618	KEGG_TYROSINE_METABOLISM
-0.0103254	0.56808	-6.48076	2.62251e-10	4.43443e-09	11.4005	KEGG_SPLICEOSOME
-0.0103022	0.472361	-5.89677	7.7558e-09	8.48576e-08	8.08869	KEGG_NUCLEOTIDE_EXCISION_REPAIR
0.0102165	0.408588	5.96782	5.20613e-09	6.91671e-08	8.47768	KEGG_FC_EPSILON_RI_SIGNALING_PATHWAY
0.0101261	0.423937	3.6933	0.00025133	0.000892426	-1.91101	KEGG_CELL_ADHESION_MOLECULES_CAMS
0.00993983	0.521179	3.75519	0.00019826	0.000752578	-1.68761	KEGG_CIRCADIAN_RHYTHM_MAMMAL
0.00964298	0.365341	4.33723	1.81859e-05	8.25018e-05	0.58138	KEGG_ETHER_LIPID_METABOLISM
0.00954871	0.348864	4.02599	6.75902e-05	0.000261912	-0.669413	KEGG_PROXIMAL_TUBULE_BICARBONATE_RECLAMATION
0.00936329	0.292121	3.42597	0.00067446	0.00209082	-2.83601	KEGG_NITROGEN_METABOLISM
-0.00932086	0.433449	-7.70834	9.7256e-14	3.01494e-12	19.1682	KEGG_PROGESTERONE_MEDIATED_OOCYTE_MATURATION
0.00928865	0.360335	4.24527	2.70295e-05	0.000116918	0.202946	KEGG_DILATED_CARDIOMYOPATHY
0.00919305	0.343203	4.79168	2.31602e-06	1.267e-05	2.55935	KEGG_PPAR_SIGNALING_PATHWAY
0.00906953	0.271626	3.23888	0.00129771	0.0038259	-3.44431	KEGG_CYTOKINE_CYTOKINE_RECEPTOR_INTERACTION
-0.00885597	0.399359	-5.27653	2.13752e-07	1.89323e-06	4.86263	KEGG_BASAL_TRANSCRIPTION_FACTORS
0.00868382	0.390554	4.8963	1.40723e-06	9.25952e-06	3.0397	KEGG_VASCULAR_SMOOTH_MUSCLE_CONTRACTION
0.00867211	0.372081	6.17326	1.60979e-09	2.49517e-08	9.62438	KEGG_LONG_TERM_DEPRESSION
-0.00865109	0.456623	-4.09102	5.17222e-05	0.000209138	-0.415181	KEGG_PENTOSE_PHOSPHATE_PATHWAY
0.008621	0.382508	3.19536	0.00150458	0.00424017	-3.58116	KEGG_HISTIDINE_METABOLISM
0.00858823	0.310715	4.8839	1.49347e-06	9.25952e-06	2.98231	KEGG_JAK_STAT_SIGNALING_PATHWAY
0.00831689	0.367871	4.06678	5.71701e-05	0.000226248	-0.510375	KEGG_HYPERTROPHIC_CARDIOMYOPATHY_HCM
-0.00826035	0.480801	-5.19924	3.16451e-07	2.55913e-06	4.48239	KEGG_P53_SIGNALING_PATHWAY
-0.00797687	0.402923	-4.13664	4.27771e-05	0.000176812	-0.234534	KEGG_ALANINE_ASPARTATE_AND_GLUTAMATE_METABOLISM
-0.00749988	0.529666	-4.59606	5.74119e-06	2.81016e-05	1.68613	KEGG_AMINOACYL_TRNA_BIOSYNTHESIS
0.00726497	0.439493	3.46006	0.000596705	0.00188114	-2.72169	KEGG_GLYCOSAMINOGLYCAN_DEGRADATION
-0.00723063	0.457847	-3.26415	0.00119	0.00362852	-3.36403	KEGG_RNA_POLYMERASE
0.00715896	0.489235	3.23468	0.00131644	0.0038259	-3.45758	KEGG_B_CELL_RECEPTOR_SIGNALING_PATHWAY
0.00678284	0.511562	5.06439	6.20434e-07	4.61603e-06	3.83077	KEGG_VASOPRESSIN_REGULATED_WATER_REABSORPTION
-0.0067102	0.502934	-5.12282	4.64278e-07	3.59815e-06	4.11126	KEGG_LYSINE_DEGRADATION
-0.00668746	0.461782	-3.21564	0.00140466	0.00401949	-3.51761	KEGG_GLYOXYLATE_AND_DICARBOXYLATE_METABOLISM
0.00667819	0.104812	3.53415	0.000455688	0.00151354	-2.46957	KEGG_NEUROACTIVE_LIGAND_RECEPTOR_INTERACTION
0.00660571	0.398761	2.94521	0.00341126	0.00881242	-4.33351	KEGG_ARRHYTHMOGENIC_RIGHT_VENTRICULAR_CARDIOMYOPATHY_ARVC
0.00648369	0.293151	4.43373	1.19079e-05	5.53718e-05	0.986501	KEGG_CALCIUM_SIGNALING_PATHWAY
-0.00646292	0.520198	-4.64316	4.62709e-06	2.45897e-05	1.8934	KEGG_PATHOGENIC_ESCHERICHIA_COLI_INFECTION
0.00629209	0.302045	3.1554	0.00172099	0.00477767	-3.70527	KEGG_HEDGEHOG_SIGNALING_PATHWAY
0.00622887	0.467062	4.49295	9.1485e-06	4.36313e-05	1.23907	KEGG_APOPTOSIS
0.00586838	0.411817	4.2065	3.1878e-05	0.000134757	0.0456016	KEGG_GNRH_SIGNALING_PATHWAY
0.00564011	0.107583	3.04216	0.00249986	0.00654892	-4.04887	KEGG_TASTE_TRANSDUCTION
0.00526012	0.414581	4.60548	5.49959e-06	2.76466e-05	1.72742	KEGG_MAPK_SIGNALING_PATHWAY
-0.00523454	0.445906	-3.64832	0.000298009	0.00100781	-2.07121	KEGG_NON_HOMOLOGOUS_END_JOINING
-0.0050677	0.518207	-6.77079	4.45148e-11	1.03497e-09	13.1399	KEGG_UBIQUITIN_MEDIATED_PROTEOLYSIS
-0.00495834	0.5372	-3.23815	0.00130093	0.0038259	-3.44661	KEGG_BLADDER_CANCER
-0.00495543	0.486585	-3.69022	0.000254293	0.000892426	-1.92204	KEGG_RNA_DEGRADATION
0.00470639	0.440931	3.47229	0.000570914	0.00183086	-2.68041	KEGG_VEGF_SIGNALING_PATHWAY
0.00468367	0.429898	3.10997	0.00200171	0.00531882	-3.84455	KEGG_BETA_ALANINE_METABOLISM
-0.00453971	0.429124	-3.14087	0.00180653	0.00494139	-3.75001	KEGG_CYSTEINE_AND_METHIONINE_METABOLISM

## Sheet: Table S7
Table S7 2^-(∆∆Ct) value of RT-qPCR experiment for 16 pairs tumor and normal samples from LUAD patients
	IGF2BP1	METTL3	NPLOC4	NSUN3	NSUN7	RBM15	YTHDF1
RDKY69P-R	0.42	0.71	0.84	0.92	9.38	1.32	0.47
RDKY118P2-R	0.24	0.63	1.18	1.01	0.64	0.64	0.91
RDKY122N1-R	3.22	0.88	0.85	1.21	1.1	1.18	1.04
RDKY129P1-R	2.3	1.08	1.12	1.19	0.52	1.09	57.5
RDKY108P1-R	1.6	2.39	1.5	1.2	1.33	1.09	0.95
RDKY66P1-R-K	0.64	1	34.43	0.98	0.91	0.99	0.81
RDKY94P1-R-K	0.53	1.37	0.62	1.29	0.61	1.19	1.32
RDKY103P-R-K	0.48	1.37	0.61	1.29	1.17	1.46	0.95
RDKY106P1-R	0.57	0.96	1.18	0.92	2.59	1.05	0.76
RDKY107P2-R-K	0.48	0.72	0.29	0.58	0.37	0.56	0.41
RDKY110P-R-K	6.43	0.64	0.56	0.88	0.55	0.68	0.51
RDKY111P-R-K	0.29	0.6	0.4	0.54	0.5	0.57	0.41
RDKY127P1-R-K	2.25	1.03	0.63	1.14	0.98	0.88	0.59
RDKY126P1-R-K	1.08	1.65	1.18	1.54	0.98	2.04	0.83
RDKY68P1-R	1.3	0.88	0.53	0.62	0.96	0.69	0.7
RDKY96P1-R	3.18	1.31	1.77	1.37	1.38	1.76	1.81
RDKY69T1-R	10.63	1.35	2.27	1.15	27.69	2.03	0.73
RDKY118T1-R	0.57	0.17	0.24	0.14	0.24	0.14	0.3
RDKY122T1-R	1.26	1.18	1.11	1.2	1.96	1.37	0.89
RDKY129T2-R	234.94	0.26	0.61	0.33	1.1	0.24	22.67
RDKY108T1-R	3.73	0.9	1.13	1.18	1.04	0.76	0.86
RDKY66T1-R	0.94	3.65	118.53	1.2	4.45	2.12	2.14
RDKY94T2-R	0.55	2.06	1.05	1.65	1.24	1.47	1.56
RDKY103T2-R	2.47	1.21	1.19	1.3	8.06	2.29	1.04
RDKY106T2-R	0.32	0.36	0.29	0.11	0.53	0.14	0.7
RDKY107T2-R-K	10.69	1.3	0.74	1.35	4.52	0.82	0.87
RDKY110T2-R	0.39	0.53	0.51	0.52	0.32	0.49	0.44
RDKY111T1-R-K	0.81	0.64	0.63	0.66	1.15	0.76	0.47
RDKY127T2-R	0.46	0.77	1.17	1.09	1.12	1.14	0.44
RDKY126T1-R	0.89	2.31	1.29	2.26	1.06	2.12	1.12
RDKY68T2-R-P	0.34	0.81	0.59	0.47	0.77	0.42	0.67
RDKY96T2-R	2.02	0.17	0.3	0.32	0.54	0.58	0.42
